# Supplementary material for: Tumor Mutational Burden Determined by Panel Sequencing Predicts Survival After Immunotherapy in Patients With Advanced Gastric Cancer
Source: Front Oncol. 2020 Mar 13;10:314. doi: 10.3389/fonc.2020.00314 (PMC7082319; doi:10.3389/fonc.2020.00314)
Supplement: Supplementary file 1 [file Data_Sheet_1.pdf]

**Table S1.** Characteristics of biopsy specimens.

**Table S2.** List and genomic regions of target genes in Oncomine Comprehensive Assay v3 (provided in another file).

**Table S3.** List and genomic regions of target genes in Oncomine Tumor Mutation Load Assay (provided in another file).

**Figure S1.** Correlation between TMB and PD-L1 CPS.

The overall linear regression line (blue) is plotted, with the grey region showing 95% confidence interval. Spearman correlation analysis was used to investigate the relationship between two variables.

**Table S4.** Clinicopathologic factors associated with tumor mutational burden.

**Table S5.** Clinicopathologic factors according to molecular subtypes of gastric cancer.

**Table S6.** Univariate Cox-regression analysis for progression-free survival.

**Figure S2.** ROC curve and AUC of each of the indicated biomarkers (A) and their combination (B) based on PFS.

**Table S7.** Genes and size of panel sequencing for tumor mutational burden and their cut-off points.

**Table S1.** Characteristics of biopsy specimens.

| <b>Site</b>          | <b>Number of cases</b> |
|----------------------|------------------------|
| - Stomach            | 56                     |
| - Duodenum           | 1                      |
| - Esophagus          | 1                      |
| - Ileum              | 1                      |
| - Liver              | 1                      |
| - Mesocolon          | 1                      |
| - Peritoneum         | 1                      |
| - Skin               | 1                      |
| <b>Chemotherapy</b>  |                        |
| - before therapy     | 46                     |
| - after therapy      | 17                     |
| <b>Immunotherapy</b> |                        |
| - before therapy     | 58                     |
| - after therapy      | 5                      |

**Figure S1.** Correlation between TMB and PD-L1 CPS.

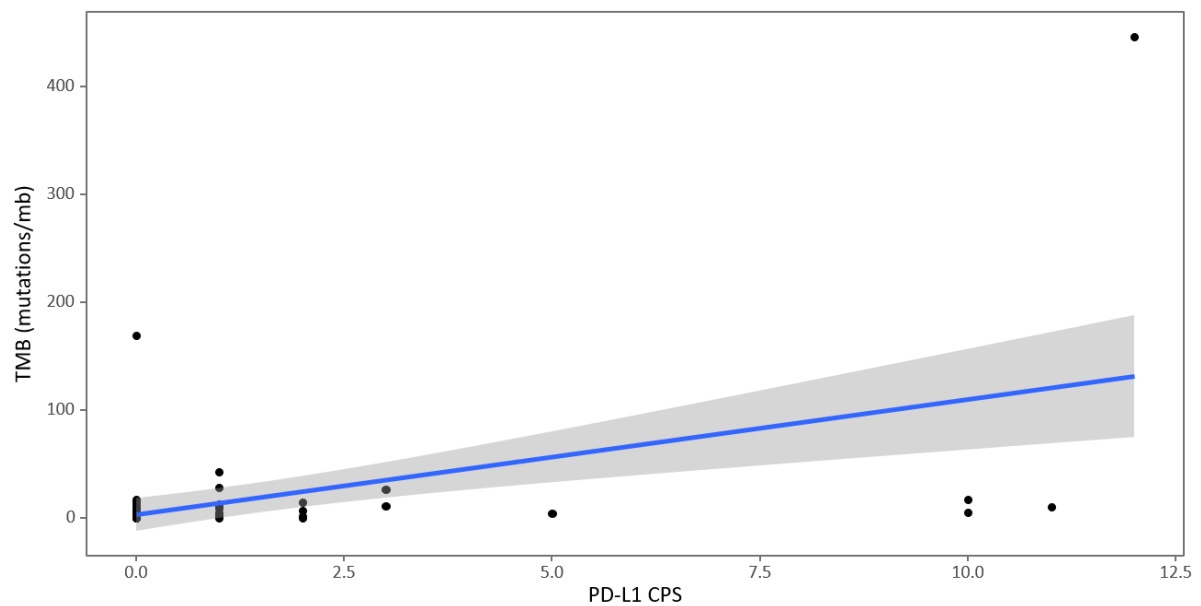

**Table S4.** Clinicopathologic factors associated with tumor mutational burden.

|                     | Median value of TMB (range) | p-value          |
|---------------------|-----------------------------|------------------|
| <b>Sex</b>          |                             | 0.0947           |
| - F                 | 3.38 (0-14.31)              |                  |
| - M                 | 5.19 (0-445.8)              |                  |
| <b>Age</b>          |                             | <b>0.0014</b>    |
| - <65 years         | 3.38 (0-169.32)             |                  |
| - ≥65 years         | 9.39 (2.52-445.8)           |                  |
| <b>MSI status</b>   |                             | <b>&lt;0.001</b> |
| - MSI               | 21.93 (7.58-445.8)          |                  |
| - MSS               | 3.42 (0-169.32)             |                  |
| <b>PD-L1</b>        |                             | 0.0503           |
| - Negative          | 3.42 (0-169.32)             |                  |
| - Positive          | 5.24 (0-445.8)              |                  |
| <b>Chemotherapy</b> |                             | 0.0218           |
| - Chemo-naïve       | 3.42 (0-169.32)             |                  |
| - Chemo-refractory  | 8.43 (0.84-445.8)           |                  |
| <b>Response</b>     |                             | 0.04             |
| - CR/PR             | 7.58 (0-445.8)              |                  |
| - SD                | 2.94 (0-13.45)              |                  |
| - PD                | 4.22 (0-169.32)             |                  |

TMB, tumor mutational burden; MSI, microsatellite instability; MSS, microsatellite-stable; PD-L1, programmed death-ligand 1; CR, complete response; PR, partial response; SD, stable disease; PD, progressive disease.

p<0.05 in bold

**Table S5.** Clinicopathologic factors according to molecular subtypes of gastric cancer.

|                           | EBV (n=4)           | MSI (n=6)             | CIN (n=23)        | TP53 <sup>+</sup> GS <sup>-</sup> (n=6) | GS (n=24)         |
|---------------------------|---------------------|-----------------------|-------------------|-----------------------------------------|-------------------|
| <b>Age (med, range)</b>   | 67 (52-71)          | 74.5 (66-82)          | 55 (29-74)        | 46.5 (38-64)                            | 53 (32-71)        |
| <b>Sex (M:F)</b>          | 4:0                 | 6:0                   | 13:10             | 4:2                                     | 10:14             |
| <b>Pathology</b>          |                     |                       |                   |                                         |                   |
| - TADC                    | 4 (100%)            | 6 (100%)              | 20 (87%)          | 4 (66.6%)                               | 17 (70.8%)        |
| - SRC                     | 0                   | 0                     | 2 (8.7%)          | 1 (16.7%)                               | 7 (29.2%)         |
| - NED                     | 0                   | 0                     | 1 (4.3%)          | 1 (16.7%)                               | 0                 |
| <b>PD-L1</b>              |                     |                       |                   |                                         |                   |
| - Positive                | 3 (75%)             | 4 (66.7%)             | 12 (52.2%)        | 2 (33.3%)                               | 5 (20.8%)         |
| - Negative                | 1 (25%)             | 2 (33.3%)             | 11 (47.8%)        | 4 (66.7%)                               | 19 (79.2%)        |
| <b>Median TMB (range)</b> | 5.06<br>(4.23-9.32) | 21.92<br>(7.58-445.8) | 5.19<br>(0-26.15) | 8.01<br>(4.23-169.32)                   | 2.12<br>(0-10.93) |
| - High                    | 0                   | 4 (66.7%)             | 2 (8.7%)          | 2 (33.3%)                               | 0                 |
| - Low                     | 4 (100%)            | 2 (33.3%)             | 21 (91.3%)        | 4 (66.7%)                               | 21 (100%)         |
| <b>Response</b>           |                     |                       |                   |                                         |                   |
| - CR/PR                   | 2 (50%)             | 5 (83.3%)             | 3 (13%)           | 2 (33.3%)                               | 1 (4.2%)          |
| - SD/PD                   | 2 (50%)             | 1 (16.7%)             | 20 (87%)          | 4 (66.7%)                               | 23 (95.8%)        |
| <b>Median PFS (month)</b> | 4.32                | 12.05                 | 2.6               | 3.07                                    | 1.27              |

EBV, Epstein-Barr virus; MSI, microsatellite instability-high; CIN, chromosomal instability; GS, genomically stable; TADC, tubular adenocarcinoma; SRC, signet ring cell carcinoma; NED, adenocarcinoma with neuroendocrine differentiation; PD-L1, programmed death-ligand 1; TMB, tumor mutational burden; CR, complete response; PR, partial response; SD, stable disease; PD, progressive disease; PFS, progression-free survival.

**Table S6.** Univariate Cox-regression analysis for progression-free survival.

|                                               | Hazard ratio | 95% CI     | p-value          |
|-----------------------------------------------|--------------|------------|------------------|
| Male vs. Female                               | 0.69         | 0.40-1.19  | 0.182            |
| Age (continuous)                              | 0.98         | 0.96-1.00  | 0.108            |
| EBV positive vs. negative                     | 1.08         | 0.39-3.03  | 0.877            |
| TMB-high vs. TMB-low                          | 0.32         | 0.12-0.90  | <b>0.031</b>     |
| MSS vs. MSI                                   | 5.17         | 1.24-21.53 | <b>0.024</b>     |
| PD-L1 positive vs. negative                   | 0.84         | 0.48-1.46  | 0.530            |
| Response (SD/PD) vs. (CR/PR)                  | 6.34         | 2.61-15.44 | <b>&lt;0.001</b> |
| ECOG PS $\leq 1$ vs. $> 1$                    | 0.39         | 0.21-0.73  | <b>0.003</b>     |
| Previous Gastrectomy Yes vs. No               | 0.93         | 0.54-1.61  | 0.789            |
| Previous line of treatment $\leq 2$ vs. $> 2$ | 0.88         | 0.51-1.53  | 0.647            |
| Peritoneal carcinomatosis Yes vs. No          | 1.60         | 0.78-3.31  | 0.202            |

CI, confidence interval; EBV, Epstein-Barr virus; TMB, tumor mutational burden; MSS, microsatellite-stable; MSI, microsatellite instability-high; PD-L1, programmed death-ligand 1; SD, stable disease; PD, progressive disease; CR, complete response; PR, partial response; ECOG PS, Eastern Cooperative Oncology Group performance status.

p<0.05 in bold

**Figure S2.** ROC curve and AUC of each of the indicated biomarkers (A) and their combination (B) based on PFS.

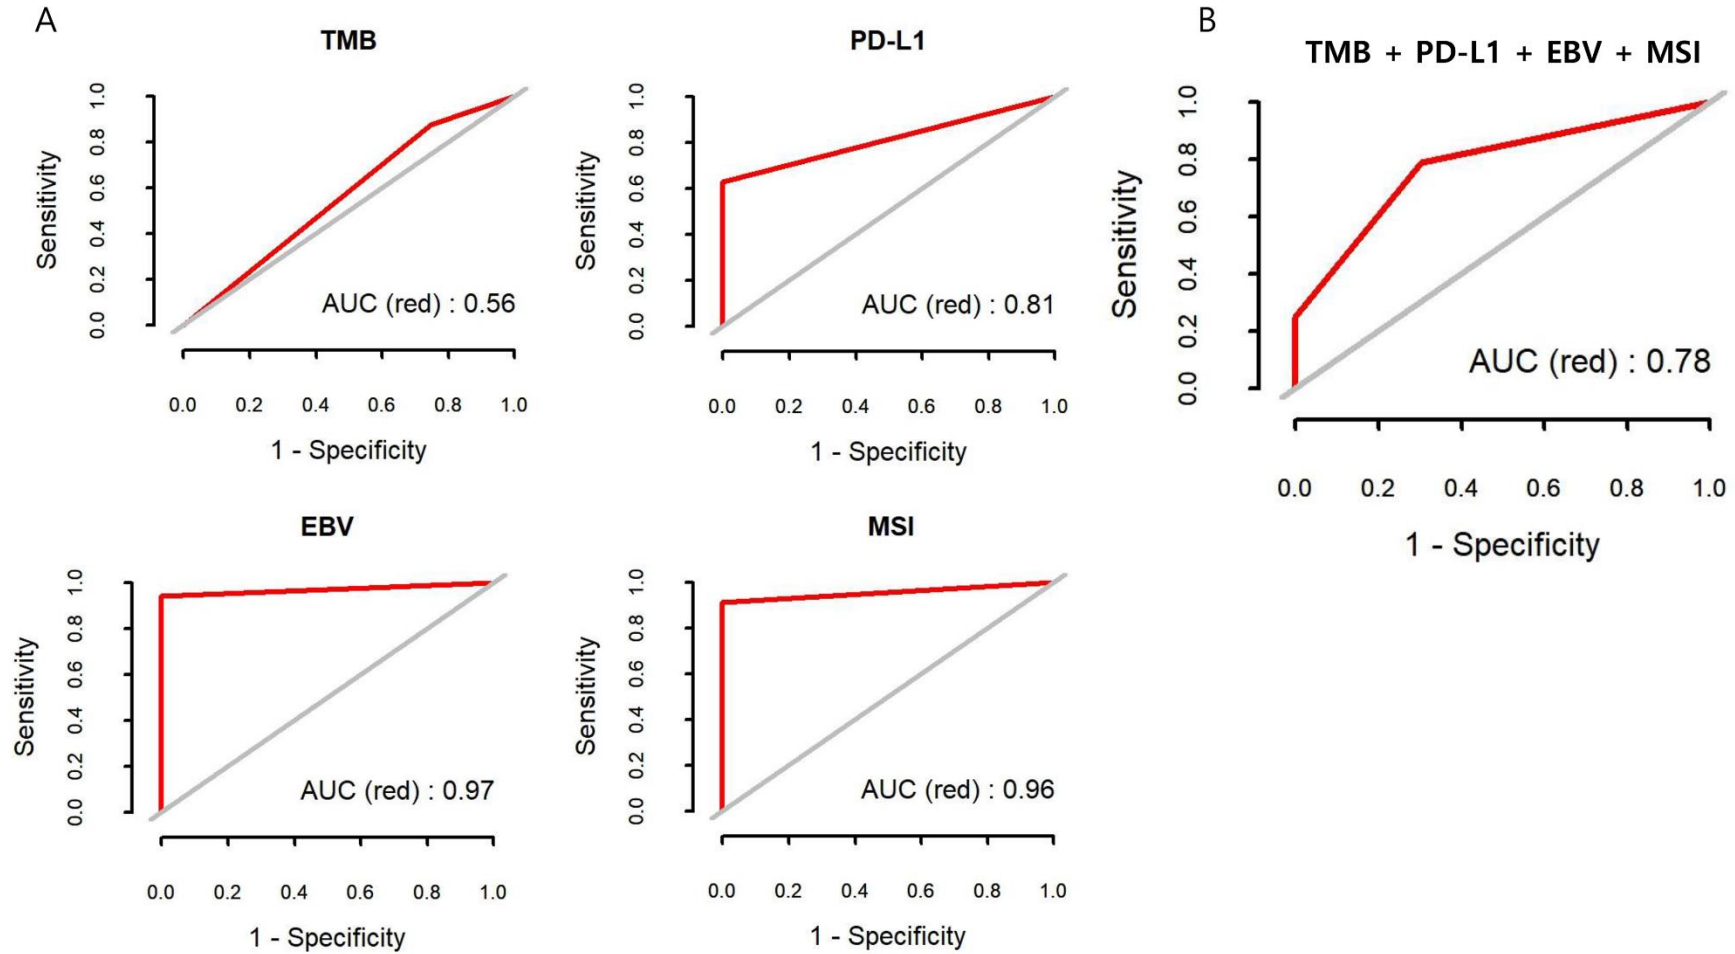

Abbreviations: ROC, receiver operating characteristic; AUC, area under the curve; TMB, tumour mutational burden; PD-L1, programmed death-ligand 1; EBV, Epstein–Barr virus; MSI, microsatellite instability

**Table S7.** Genes and size of panel sequencing for tumor mutational burden and their cut-off points.

| Cancer type | Drug                              | TMB panel<br>(number of gene, size)  | Cut-off<br>(mt/mb) | Percentile  | RR                   | PFS (months)                                   | OS (months)                                    | Reference            |
|-------------|-----------------------------------|--------------------------------------|--------------------|-------------|----------------------|------------------------------------------------|------------------------------------------------|----------------------|
| Solid tumor | Various IO therapies              | F1 (~315 genes, ~1.2mb)              | 20                 | 90          | 58% vs. 20%          | 12.8 vs. 3.3                                   | Not reached vs. 16.3                           | [1]                  |
| Solid tumor | NA                                | SSXT (592 genes, 1.4mb)              | 17                 | 92.3        | NA                   | NA                                             | NA                                             | [2]                  |
| Solid tumor | Various IO therapies              | IMPACT v3<br>(468 genes, 1.22mb)     | 8.8                | 80          | NA                   | PFS advantage                                  | OS advantage                                   | [3]                  |
| NSCLC       | Various IO therapies              | IMPACT v1~3<br>(~468 genes, ~1.22mb) | 7.4                | 50          | 38.6% vs. 25.1%      | NA                                             | NA                                             | [4]                  |
| NSCLC       | Nivolumab + ipilimumab            | F1 (324 genes, 0.8mb)                | 10                 | 50          | 44% vs. 12%          | 7.1 vs. 2.6                                    | NA                                             | [5]                  |
| NSCLC       | Nivolumab ± ipilimumab            | F1 (324 genes, 0.8mb)                | 10                 | 50          | 45.3% vs. 24.6%      | 7.1 vs. 3.2                                    | NA                                             | [6]                  |
| NSCLC       | Atezolizumab                      | F1 (315 genes, 1.2mb)                | 9.9                | 50          | 25% vs. 14%          | HR 0.64                                        | HR 0.87                                        | [7]                  |
| NSCLC       | Atezolizumab                      | F1 (315 genes, 1.2mb)                | 9.9                | 50          | 20% vs. 4%           | 7.3 vs. 2.8                                    | 16.2 vs. 8.3                                   | [8]                  |
| BLCA        | Atezolizumab                      | F1 (315 genes, 1.2mb)                | 16                 | 75          | NA                   | NA                                             | OS advantage                                   | [9]                  |
| BLCA        | Atezolizumab                      | F1 (NA)                              | 9.65               | 50          | NA                   | NA                                             | HR 0.68                                        | [10]                 |
| GC          | NA                                | CS (404 genes, 2.3mb)                | 10.5               | 89          | NA                   | NA                                             | NA                                             | [11]                 |
| GC          | NA                                | SSXT (592 genes, 1.4mb)              | 17                 | 93.1        | NA                   | NA                                             | NA                                             | [12]                 |
| GC          | Nivolumab                         | OCA v3 (161 genes, 0.39mb)           | 10                 | 41          | 22%                  | 1.4 vs. 2.3                                    | NA                                             | [13]                 |
| <b>GC</b>   | <b>Pembrolizumab or nivolumab</b> | <b>TML (409 genes, 1.7mb)</b>        | <b>14.31</b>       | <b>87.3</b> | <b>50% vs. 16.4%</b> | <b>13.4 vs. 2.1</b><br><b>HR 0.32, p=0.023</b> | <b>16.1 vs. 4.8</b><br><b>HR 0.47, p=0.149</b> | <b>Present study</b> |
| <b>GC</b>   | <b>Pembrolizumab or nivolumab</b> | <b>TML (409 genes, 1.7mb)</b>        | <b>10.6</b>        | <b>80</b>   | <b>38.5% vs. 16%</b> | <b>2.6 vs. 2.3</b><br><b>HR 0.53, p=0.08</b>   | <b>6.4 vs. 4.8</b><br><b>HR 0.63, p=0.22</b>   | <b>Present study</b> |

TMB, tumor mutational burden; RR, response rate; PFS, progression-free survival; OS, overall survival; NSCLC, non-small cell lung cancer; BLCA, bladder urothelial carcinoma; GC, gastric carcinoma; IO therapy, immune-oncologic therapy; F1, FoundationOne panel; SSXT, a custom-designed SureSelect XT assay; IMPACT, IMPACT MSKCC panel; CS, Illumina based-CancerScan; OCA, Oncomine Comprehensive Assay; TML, Oncomine Tumor Mutation Load Assay; HR, hazard ratio; NA, not available

## REFERENCES

1. Goodman AM, Kato S, Bazhenova L et al. Tumor Mutational Burden as an Independent Predictor of Response to Immunotherapy in Diverse Cancers. *Mol Cancer Ther* 2017; 16: 2598-2608.
2. Vanderwalde A, Spetzler D, Xiao N et al. Microsatellite instability status determined by next-generation sequencing and compared with PD-L1 and tumor mutational burden in 11,348 patients. *Cancer Med* 2018; 7: 746-756.
3. Samstein RM, Lee CH, Shoushtari AN et al. Tumor mutational load predicts survival after immunotherapy across multiple cancer types. *Nat Genet* 2019; 51: 202-206.
4. Rizvi H, Sanchez-Vega F, La K et al. Molecular Determinants of Response to Anti-Programmed Cell Death (PD)-1 and Anti-Programmed Death-Ligand 1 (PD-L1) Blockade in Patients With Non-Small-Cell Lung Cancer Profiled With Targeted Next-Generation Sequencing. *J Clin Oncol* 2018; 36: 633-641.
5. Carbone DP, Reck M, Paz-Ares L et al. First-Line Nivolumab in Stage IV or Recurrent Non-Small-Cell Lung Cancer. *N Engl J Med* 2017; 376: 2415-2426.
6. Hellmann MD, Ciuleanu TE, Pluzanski A et al. Nivolumab plus Ipilimumab in Lung Cancer with a High Tumor Mutational Burden. *N Engl J Med* 2018; 378: 2093-2104.
7. Kowanetz M, Zou W, Shames DS et al. Tumor mutation load assessed by FoundationOne (FM1) is associated with improved efficacy of atezolizumab (atezo) in patients with advanced NSCLC. *Annals of Oncology* 2016; 27.
8. Kowanetz M, Zou W, Shames D et al. Tumor Mutation Burden (TMB) is Associated with Improved Efficacy of Atezolizumab in 1L and 2L+NSCLC Patients. *Journal of Thoracic Oncology* 2017; 12: S321-S322.
9. Rosenberg JE, Hoffman-Censits J, Powles T et al. Atezolizumab in patients with locally advanced and metastatic urothelial carcinoma who have progressed following treatment with platinum-based chemotherapy: a single-arm, multicentre, phase 2 trial. *Lancet* 2016; 387: 1909-1920.
10. Powles T, Duran I, van der Heijden MS et al. Atezolizumab versus chemotherapy in patients with platinum-treated locally advanced or metastatic urothelial carcinoma (IMvigor211): a multicentre, open-label, phase 3 randomised controlled trial. *Lancet* 2018; 391: 748-757.
11. Cho J, Ahn S, Son DS et al. Bridging genomics and phenomics of gastric carcinoma. *Int J Cancer* 2019.
12. Weinberg BA, Xiu J, Hwang JJ et al. Immuno-Oncology Biomarkers for Gastric and Gastroesophageal Junction Adenocarcinoma: Why PD-L1 Testing May Not Be Enough. *Oncologist* 2018; 23: 1171-1177.
13. Mishima S, Kawazoe A, Nakamura Y et al. Clinicopathological and molecular features of responders to nivolumab for patients with advanced gastric cancer. *J Immunother Cancer* 2019; 7: 24.
