# Supplementary material for: Tumor Mutational Burden Determined by Panel Sequencing Predicts Survival After Immunotherapy in Patients With Advanced Gastric Cancer
Source: Front Oncol. 2020 Mar 13;10:314. doi: 10.3389/fonc.2020.00314 (PMC7082319; doi:10.3389/fonc.2020.00314)
Supplement: Supplementary file 3 [file Table_3.xlsx]

## Sheet: OCAv3.20170110.designed
track name="OCAv3_Designed" description="Amplicon_Insert_OCAv3" ionVersion=4.0 type=bedDetail fileVersion=20170110 db=hg19 reference=hg19
chr1	11168314	11168438	SP_1.33743	.	GENE_ID=MTOR;Pool=1;PURPOSE=Hotspot;CNV_ID=MTOR;CNV_HS=0
chr1	11169343	11169466	SP_2.43457	.	GENE_ID=MTOR;Pool=2;PURPOSE=Hotspot;CNV_ID=MTOR;CNV_HS=0
chr1	11174374	11174494	SP_3.22245	.	GENE_ID=MTOR;Pool=1;PURPOSE=Hotspot;CNV_ID=MTOR;CNV_HS=0
chr1	11182093	11182218	SP_4.29997	.	GENE_ID=MTOR;Pool=2;PURPOSE=Hotspot;CNV_ID=MTOR;CNV_HS=0
chr1	11184539	11184658	SP_5.9350	.	GENE_ID=MTOR;Pool=1;PURPOSE=Hotspot;CNV_ID=MTOR;CNV_HS=0
chr1	11187794	11187920	SP_6.86169	.	GENE_ID=MTOR;Pool=2;PURPOSE=Hotspot;CNV_ID=MTOR;CNV_HS=0
chr1	11188005	11188099	SP_6.87526	.	GENE_ID=MTOR;Pool=1;PURPOSE=Hotspot;CNV_ID=MTOR;CNV_HS=0
chr1	11188114	11188228	SP_6.100237	.	GENE_ID=MTOR;Pool=2;PURPOSE=Hotspot;CNV_ID=MTOR;CNV_HS=0
chr1	11189759	11189881	SP_7.34238	.	GENE_ID=MTOR;Pool=1;PURPOSE=Hotspot;CNV_ID=MTOR;CNV_HS=0
chr1	11190791	11190899	SP_8.22255	.	GENE_ID=MTOR;Pool=2;PURPOSE=Hotspot;CNV_ID=MTOR;CNV_HS=0
chr1	11210100	11210228	SP_9.9440	.	GENE_ID=MTOR;Pool=1;PURPOSE=Hotspot;CNV_ID=MTOR;CNV_HS=0
chr1	11217203	11217324	SP_10.26453	.	GENE_ID=MTOR;Pool=2;PURPOSE=Hotspot;CNV_ID=MTOR;CNV_HS=0
chr1	11227467	11227591	SP_11.41365	.	GENE_ID=MTOR;Pool=1;PURPOSE=Hotspot;CNV_ID=MTOR;CNV_HS=0
chr1	27022879	27023026	ARID1A_1.908	.	GENE_ID=ARID1A;Pool=2;PURPOSE=CDS;CNV_ID=ARID1A;CNV_HS=1
chr1	27022976	27023113	ARID1A_1.1.16110	.	GENE_ID=ARID1A;Pool=1;PURPOSE=CDS;CNV_ID=ARID1A;CNV_HS=1;TRIM_LEFT=13
chr1	27023113	27023219	ARID1A_1.1.8321	.	GENE_ID=ARID1A;Pool=2;PURPOSE=CDS;CNV_ID=ARID1A;CNV_HS=1
chr1	27023211	27023298	ARID1A_1.1.10694	.	GENE_ID=ARID1A;Pool=1;PURPOSE=CDS;CNV_ID=ARID1A;CNV_HS=1
chr1	27023249	27023347	ARID1A_1.1.6920	.	GENE_ID=ARID1A;Pool=2;PURPOSE=CDS;CNV_ID=ARID1A;CNV_HS=1;TRIM_LEFT=8
chr1	27023344	27023468	ARID1A_3.1838	.	GENE_ID=ARID1A;Pool=1;PURPOSE=CDS;CNV_ID=ARID1A;CNV_HS=1
chr1	27023377	27023516	ARID1A_1.1.21853	.	GENE_ID=ARID1A;Pool=2;PURPOSE=CDS;CNV_ID=ARID1A;CNV_HS=1;TRIM_LEFT=12
chr1	27023509	27023596	ARID1A_1.1.4195	.	GENE_ID=ARID1A;Pool=1;PURPOSE=CDS;CNV_ID=ARID1A;CNV_HS=1
chr1	27023551	27023684	ARID1A_1.1.15785	.	GENE_ID=ARID1A;Pool=2;PURPOSE=CDS;CNV_ID=ARID1A;CNV_HS=1;TRIM_LEFT=6
chr1	27023684	27023772	ARID1A_1.1.7999	.	GENE_ID=ARID1A;Pool=1;PURPOSE=CDS;CNV_ID=ARID1A;CNV_HS=1
chr1	27023710	27023837	ARID1A_1.1.15446	.	GENE_ID=ARID1A;Pool=2;PURPOSE=CDS;CNV_ID=ARID1A;CNV_HS=1;TRIM_LEFT=4
chr1	27023829	27023942	ARID1A_1.2.5109	.	GENE_ID=ARID1A;Pool=1;PURPOSE=CDS;CNV_ID=ARID1A;CNV_HS=1
chr1	27023895	27024032	ARID1A_1.2.2526	.	GENE_ID=ARID1A;Pool=2;PURPOSE=CDS;CNV_ID=ARID1A;CNV_HS=1;TRIM_LEFT=8
chr1	27024031	27024138	ARID1A_1.2.3761	.	GENE_ID=ARID1A;Pool=1;PURPOSE=CDS;CNV_ID=ARID1A;CNV_HS=1
chr1	27056093	27056167	ARID1A_2.55370	.	GENE_ID=ARID1A;Pool=2;PURPOSE=CDS;CNV_ID=ARID1A;CNV_HS=1
chr1	27056167	27056290	ARID1A_2.50064	.	GENE_ID=ARID1A;Pool=1;PURPOSE=CDS;CNV_ID=ARID1A;CNV_HS=1
chr1	27056218	27056348	ARID1A_2.65751	.	GENE_ID=ARID1A;Pool=2;PURPOSE=CDS;CNV_ID=ARID1A;CNV_HS=1;TRIM_LEFT=4
chr1	27056347	27056442	ARID1A_2.46744	.	GENE_ID=ARID1A;Pool=1;PURPOSE=CDS;CNV_ID=ARID1A;CNV_HS=1
chr1	27057611	27057690	ARID1A_3.72618	.	GENE_ID=ARID1A;Pool=2;PURPOSE=CDS;CNV_ID=ARID1A;CNV_HS=1
chr1	27057652	27057780	ARID1A_3.213747	.	GENE_ID=ARID1A;Pool=1;PURPOSE=CDS;CNV_ID=ARID1A;CNV_HS=1;TRIM_LEFT=5
chr1	27057757	27057842	ARID1A_3.144822	.	GENE_ID=ARID1A;Pool=2;PURPOSE=CDS;CNV_ID=ARID1A;CNV_HS=1;TRIM_LEFT=5
chr1	27057813	27057942	ARID1A_3.21358	.	GENE_ID=ARID1A;Pool=1;PURPOSE=CDS;CNV_ID=ARID1A;CNV_HS=1;TRIM_LEFT=9
chr1	27057908	27057995	ARID1A_3.84310	.	GENE_ID=ARID1A;Pool=2;PURPOSE=CDS;CNV_ID=ARID1A;CNV_HS=1;TRIM_LEFT=7
chr1	27057974	27058097	ARID1A_3.63720	.	GENE_ID=ARID1A;Pool=1;PURPOSE=CDS;CNV_ID=ARID1A;CNV_HS=1;TRIM_LEFT=10
chr1	27058070	27058149	ARID1A_3.34538	.	GENE_ID=ARID1A;Pool=2;PURPOSE=CDS;CNV_ID=ARID1A;CNV_HS=1;TRIM_LEFT=9
chr1	27059096	27059169	ARID1A_4.38018	.	GENE_ID=ARID1A;Pool=1;PURPOSE=CDS;CNV_ID=ARID1A;CNV_HS=1
chr1	27059166	27059286	ARID1A_4.36739	.	GENE_ID=ARID1A;Pool=2;PURPOSE=CDS;CNV_ID=ARID1A;CNV_HS=1
chr1	27059267	27059342	ARID1A_4.24423	.	GENE_ID=ARID1A;Pool=1;PURPOSE=CDS;CNV_ID=ARID1A;CNV_HS=1;TRIM_LEFT=5
chr1	27087331	27087443	ARID1A_5.49309	.	GENE_ID=ARID1A;Pool=2;PURPOSE=CDS;CNV_ID=ARID1A;CNV_HS=1
chr1	27087432	27087550	ARID1A_5.57328	.	GENE_ID=ARID1A;Pool=1;PURPOSE=CDS;CNV_ID=ARID1A;CNV_HS=1;TRIM_LEFT=5
chr1	27087482	27087603	ARID1A_5.16856	.	GENE_ID=ARID1A;Pool=2;PURPOSE=CDS;CNV_ID=ARID1A;CNV_HS=1;TRIM_LEFT=5
chr1	27087856	27087929	ARID1A_6.24685	.	GENE_ID=ARID1A;Pool=1;PURPOSE=CDS;CNV_ID=ARID1A;CNV_HS=1
chr1	27087870	27087994	ARID1A_6.51616	.	GENE_ID=ARID1A;Pool=2;PURPOSE=CDS;CNV_ID=ARID1A;CNV_HS=1;TRIM_LEFT=6
chr1	27088613	27088717	ARID1A_7.63556	.	GENE_ID=ARID1A;Pool=1;PURPOSE=CDS;CNV_ID=ARID1A;CNV_HS=1
chr1	27088716	27088818	ARID1A_7.36631	.	GENE_ID=ARID1A;Pool=2;PURPOSE=CDS;CNV_ID=ARID1A;CNV_HS=1
chr1	27089444	27089556	ARID1A_8.181699	.	GENE_ID=ARID1A;Pool=1;PURPOSE=CDS;CNV_ID=ARID1A;CNV_HS=1
chr1	27089521	27089642	ARID1A_8.51486	.	GENE_ID=ARID1A;Pool=2;PURPOSE=CDS;CNV_ID=ARID1A;CNV_HS=1;TRIM_LEFT=4
chr1	27089625	27089711	ARID1A_8.96734	.	GENE_ID=ARID1A;Pool=1;PURPOSE=CDS;CNV_ID=ARID1A;CNV_HS=1;TRIM_LEFT=6
chr1	27089677	27089796	ARID1A_8.61158	.	GENE_ID=ARID1A;Pool=2;PURPOSE=CDS;CNV_ID=ARID1A;CNV_HS=1;TRIM_LEFT=5
chr1	27092701	27092772	ARID1A_9.96175	.	GENE_ID=ARID1A;Pool=1;PURPOSE=CDS;CNV_ID=ARID1A;CNV_HS=1
chr1	27092768	27092866	ARID1A_9.37268	.	GENE_ID=ARID1A;Pool=2;PURPOSE=CDS;CNV_ID=ARID1A;CNV_HS=1
chr1	27092934	27093052	ARID1A_10.39254	.	GENE_ID=ARID1A;Pool=1;PURPOSE=CDS;CNV_ID=ARID1A;CNV_HS=1
chr1	27093030	27093120	ARID1A_10.31980	.	GENE_ID=ARID1A;Pool=2;PURPOSE=CDS;CNV_ID=ARID1A;CNV_HS=1;TRIM_LEFT=7
chr1	27094275	27094354	ARID1A_11.58186	.	GENE_ID=ARID1A;Pool=1;PURPOSE=CDS;CNV_ID=ARID1A;CNV_HS=1
chr1	27094334	27094424	ARID1A_11.88123	.	GENE_ID=ARID1A;Pool=2;PURPOSE=CDS;CNV_ID=ARID1A;CNV_HS=1;TRIM_LEFT=8
chr1	27094393	27094472	ARID1A_11.134393	.	GENE_ID=ARID1A;Pool=1;PURPOSE=CDS;CNV_ID=ARID1A;CNV_HS=1;TRIM_LEFT=5
chr1	27094469	27094546	ARID1A_11.70754	.	GENE_ID=ARID1A;Pool=2;PURPOSE=CDS;CNV_ID=ARID1A;CNV_HS=1
chr1	27097604	27097729	ARID1A_12.99703	.	GENE_ID=ARID1A;Pool=1;PURPOSE=CDS;CNV_ID=ARID1A;CNV_HS=1
chr1	27097729	27097809	ARID1A_12.27872	.	GENE_ID=ARID1A;Pool=2;PURPOSE=CDS;CNV_ID=ARID1A;CNV_HS=1
chr1	27097778	27097900	ARID1A_12.20703	.	GENE_ID=ARID1A;Pool=1;PURPOSE=CDS;CNV_ID=ARID1A;CNV_HS=1;TRIM_LEFT=9
chr1	27098914	27098992	ARID1A_13.81838	.	GENE_ID=ARID1A;Pool=2;PURPOSE=CDS;CNV_ID=ARID1A;CNV_HS=1
chr1	27098991	27099117	ARID1A_13.83235	.	GENE_ID=ARID1A;Pool=1;PURPOSE=CDS;CNV_ID=ARID1A;CNV_HS=1
chr1	27099077	27099161	ARID1A_13.16992	.	GENE_ID=ARID1A;Pool=2;PURPOSE=CDS;CNV_ID=ARID1A;CNV_HS=1;TRIM_LEFT=2
chr1	27099295	27099370	ARID1A_14.134873	.	GENE_ID=ARID1A;Pool=1;PURPOSE=CDS;CNV_ID=ARID1A;CNV_HS=1
chr1	27099360	27099432	ARID1A_14.170633	.	GENE_ID=ARID1A;Pool=2;PURPOSE=CDS;CNV_ID=ARID1A;CNV_HS=1;TRIM_LEFT=6
chr1	27099402	27099483	ARID1A_14.962	.	GENE_ID=ARID1A;Pool=1;PURPOSE=CDS;CNV_ID=ARID1A;CNV_HS=1
chr1	27099765	27099842	ARID1A_15.17905	.	GENE_ID=ARID1A;Pool=2;PURPOSE=CDS;CNV_ID=ARID1A;CNV_HS=1
chr1	27099833	27099979	ARID1A_15.35608	.	GENE_ID=ARID1A;Pool=1;PURPOSE=CDS;CNV_ID=ARID1A;CNV_HS=1
chr1	27099978	27100082	ARID1A_15.9793	.	GENE_ID=ARID1A;Pool=2;PURPOSE=CDS;CNV_ID=ARID1A;CNV_HS=1
chr1	27100080	27100210	ARID1A_16.19485	.	GENE_ID=ARID1A;Pool=1;PURPOSE=CDS;CNV_ID=ARID1A;CNV_HS=1
chr1	27100176	27100298	ARID1A_16.61141	.	GENE_ID=ARID1A;Pool=2;PURPOSE=CDS;CNV_ID=ARID1A;CNV_HS=1;TRIM_LEFT=6
chr1	27100288	27100417	ARID1A_17.37639	.	GENE_ID=ARID1A;Pool=1;PURPOSE=CDS;CNV_ID=ARID1A;CNV_HS=1;TRIM_LEFT=4
chr1	27100814	27100963	ARID1A_18.123409	.	GENE_ID=ARID1A;Pool=2;PURPOSE=CDS;CNV_ID=ARID1A;CNV_HS=1
chr1	27100896	27100994	ARID1A_18.225615	.	GENE_ID=ARID1A;Pool=1;PURPOSE=CDS;CNV_ID=ARID1A;CNV_HS=1
chr1	27100994	27101125	ARID1A_18.88844	.	GENE_ID=ARID1A;Pool=2;PURPOSE=CDS;CNV_ID=ARID1A;CNV_HS=1
chr1	27101097	27101178	ARID1A_18.85623	.	GENE_ID=ARID1A;Pool=1;PURPOSE=CDS;CNV_ID=ARID1A;CNV_HS=1;TRIM_LEFT=7
chr1	27101158	27101287	ARID1A_18.184554	.	GENE_ID=ARID1A;Pool=2;PURPOSE=CDS;CNV_ID=ARID1A;CNV_HS=1;TRIM_LEFT=10
chr1	27101256	27101335	ARID1A_18.176948	.	GENE_ID=ARID1A;Pool=1;PURPOSE=CDS;CNV_ID=ARID1A;CNV_HS=1;TRIM_LEFT=7
chr1	27101320	27101450	ARID1A_18.128480	.	GENE_ID=ARID1A;Pool=2;PURPOSE=CDS;CNV_ID=ARID1A;CNV_HS=1;TRIM_LEFT=4
chr1	27101433	27101513	ARID1A_18.73364	.	GENE_ID=ARID1A;Pool=1;PURPOSE=CDS;CNV_ID=ARID1A;CNV_HS=1;TRIM_LEFT=3
chr1	27101485	27101614	ARID1A_18.253696	.	GENE_ID=ARID1A;Pool=2;PURPOSE=CDS;CNV_ID=ARID1A;CNV_HS=1;TRIM_LEFT=5
chr1	27101570	27101691	ARID1A_18.181619	.	GENE_ID=ARID1A;Pool=1;PURPOSE=CDS;CNV_ID=ARID1A;CNV_HS=1;TRIM_LEFT=5
chr1	27101642	27101727	ARID1A_18.146093	.	GENE_ID=ARID1A;Pool=2;PURPOSE=CDS;CNV_ID=ARID1A;CNV_HS=1;TRIM_LEFT=5
chr1	27102049	27102127	ARID1A_19.41328	.	GENE_ID=ARID1A;Pool=1;PURPOSE=CDS;CNV_ID=ARID1A;CNV_HS=1
chr1	27102068	27102199	ARID1A_19.10197	.	GENE_ID=ARID1A;Pool=2;PURPOSE=CDS;CNV_ID=ARID1A;CNV_HS=1;TRIM_LEFT=7
chr1	27102171	27102253	ARID1A_19.20895	.	GENE_ID=ARID1A;Pool=1;PURPOSE=CDS;CNV_ID=ARID1A;CNV_HS=1;TRIM_LEFT=9
chr1	27105496	27105615	ARID1A_20.1.226444	.	GENE_ID=ARID1A;Pool=2;PURPOSE=CDS;CNV_ID=ARID1A;CNV_HS=1
chr1	27105603	27105697	ARID1A_20.1.353649	.	GENE_ID=ARID1A;Pool=1;PURPOSE=CDS;CNV_ID=ARID1A;CNV_HS=1;TRIM_LEFT=6
chr1	27105646	27105756	ARID1A_20.1.304084	.	GENE_ID=ARID1A;Pool=2;PURPOSE=CDS;CNV_ID=ARID1A;CNV_HS=1;TRIM_LEFT=4
chr1	27105752	27105821	ARID1A_20.1.66890	.	GENE_ID=ARID1A;Pool=1;PURPOSE=CDS;CNV_ID=ARID1A;CNV_HS=1
chr1	27105791	27105896	ARID1A_20.1.191781	.	GENE_ID=ARID1A;Pool=2;PURPOSE=CDS;CNV_ID=ARID1A;CNV_HS=1;TRIM_LEFT=9
chr1	27105881	27105961	ARID1A_20.1.274729	.	GENE_ID=ARID1A;Pool=1;PURPOSE=CDS;CNV_ID=ARID1A;CNV_HS=1;TRIM_LEFT=5
chr1	27105926	27106058	ARID1A_20.1.145075	.	GENE_ID=ARID1A;Pool=2;PURPOSE=CDS;CNV_ID=ARID1A;CNV_HS=1;TRIM_LEFT=7
chr1	27106054	27106135	ARID1A_20.1.283498	.	GENE_ID=ARID1A;Pool=1;PURPOSE=CDS;CNV_ID=ARID1A;CNV_HS=1
chr1	27106096	27106194	ARID1A_20.1.133741	.	GENE_ID=ARID1A;Pool=2;PURPOSE=CDS;CNV_ID=ARID1A;CNV_HS=1;TRIM_LEFT=9
chr1	27106191	27106289	ARID1A_20.1.232386	.	GENE_ID=ARID1A;Pool=1;PURPOSE=CDS;CNV_ID=ARID1A;CNV_HS=1
chr1	27106227	27106356	ARID1A_20.1.121354	.	GENE_ID=ARID1A;Pool=2;PURPOSE=CDS;CNV_ID=ARID1A;CNV_HS=1;TRIM_LEFT=6
chr1	27106356	27106438	ARID1A_20.1.273086	.	GENE_ID=ARID1A;Pool=1;PURPOSE=CDS;CNV_ID=ARID1A;CNV_HS=1
chr1	27106388	27106504	ARID1A_20.2.221784	.	GENE_ID=ARID1A;Pool=2;PURPOSE=CDS;CNV_ID=ARID1A;CNV_HS=1;TRIM_LEFT=3
chr1	27106497	27106574	ARID1A_20.2.84585	.	GENE_ID=ARID1A;Pool=1;PURPOSE=CDS;CNV_ID=ARID1A;CNV_HS=1;TRIM_LEFT=5
chr1	27106535	27106654	ARID1A_20.2.254180	.	GENE_ID=ARID1A;Pool=2;PURPOSE=CDS;CNV_ID=ARID1A;CNV_HS=1;TRIM_LEFT=6
chr1	27106630	27106732	ARID1A_20.2.235987	.	GENE_ID=ARID1A;Pool=1;PURPOSE=CDS;CNV_ID=ARID1A;CNV_HS=1;TRIM_LEFT=10
chr1	27106692	27106822	ARID1A_20.2.148387	.	GENE_ID=ARID1A;Pool=2;PURPOSE=CDS;CNV_ID=ARID1A;CNV_HS=1;TRIM_LEFT=8
chr1	27106805	27106891	ARID1A_20.2.156796	.	GENE_ID=ARID1A;Pool=1;PURPOSE=CDS;CNV_ID=ARID1A;CNV_HS=1;TRIM_LEFT=5
chr1	27106857	27106983	ARID1A_20.2.52109	.	GENE_ID=ARID1A;Pool=2;PURPOSE=CDS;CNV_ID=ARID1A;CNV_HS=1;TRIM_LEFT=5
chr1	27106971	27107053	ARID1A_20.2.68833	.	GENE_ID=ARID1A;Pool=1;PURPOSE=CDS;CNV_ID=ARID1A;CNV_HS=1;TRIM_LEFT=6
chr1	27107012	27107146	ARID1A_20.2.105668	.	GENE_ID=ARID1A;Pool=2;PURPOSE=CDS;CNV_ID=ARID1A;CNV_HS=1;TRIM_LEFT=8
chr1	27107144	27107220	ARID1A_20.2.196226	.	GENE_ID=ARID1A;Pool=1;PURPOSE=CDS;CNV_ID=ARID1A;CNV_HS=1
chr1	27107177	27107279	ARID1A_20.2.206730	.	GENE_ID=ARID1A;Pool=2;PURPOSE=CDS;CNV_ID=ARID1A;CNV_HS=1
chr1	40362965	40363091	MYCL_1.248652	.	GENE_ID=MYCL;Pool=1;PURPOSE=CNV;CNV_ID=MYCL;CNV_HS=1
chr1	40363087	40363221	MYCL_1.50058	.	GENE_ID=MYCL;Pool=2;PURPOSE=CNV;CNV_ID=MYCL;CNV_HS=1
chr1	40363157	40363288	MYCL_1.56819	.	GENE_ID=MYCL;Pool=1;PURPOSE=CNV;CNV_ID=MYCL;CNV_HS=1;TRIM_LEFT=6
chr1	40363391	40363511	MYCL_1.176254	.	GENE_ID=MYCL;Pool=2;PURPOSE=CNV;CNV_ID=MYCL;CNV_HS=1
chr1	40363490	40363604	MYCL_1.136241	.	GENE_ID=MYCL;Pool=1;PURPOSE=CNV;CNV_ID=MYCL;CNV_HS=1;TRIM_LEFT=8
chr1	40366404	40366510	MYCL_2.45511	.	GENE_ID=MYCL;Pool=2;PURPOSE=CNV;CNV_ID=MYCL;CNV_HS=1
chr1	40366490	40366602	MYCL_2.45255	.	GENE_ID=MYCL;Pool=1;PURPOSE=CNV;CNV_ID=MYCL;CNV_HS=1;TRIM_LEFT=8
chr1	40366591	40366709	MYCL_2.67961	.	GENE_ID=MYCL;Pool=2;PURPOSE=CNV;CNV_ID=MYCL;CNV_HS=1;TRIM_LEFT=3
chr1	40366825	40366928	MYCL_2.33929	.	GENE_ID=MYCL;Pool=1;PURPOSE=CNV;CNV_ID=MYCL;CNV_HS=1
chr1	40366909	40367017	MYCL_2.79801	.	GENE_ID=MYCL;Pool=2;PURPOSE=CNV;CNV_ID=MYCL;CNV_HS=1;TRIM_LEFT=6
chr1	53692718	53692842	SP_12.20695	.	GENE_ID=MAGOH;Pool=1;PURPOSE=Hotspot;CNV_ID=MAGOH;CNV_HS=0
chr1	65310459	65310579	SP_13.23267	.	GENE_ID=JAK1;Pool=2;PURPOSE=Hotspot;CNV_ID=JAK1;CNV_HS=0
chr1	65311191	65311309	SP_14.25834	.	GENE_ID=JAK1;Pool=1;PURPOSE=Hotspot;CNV_ID=JAK1;CNV_HS=0
chr1	65312329	65312435	SP_15.8053	.	GENE_ID=JAK1;Pool=2;PURPOSE=Hotspot;CNV_ID=JAK1;CNV_HS=0
chr1	115252190	115252312	SP_16.9245	.	GENE_ID=NRAS;Pool=1;PURPOSE=Hotspot;CNV_ID=NRAS;CNV_HS=0
chr1	115256445	115256564	SP_17.46884	.	GENE_ID=NRAS;Pool=2;PURPOSE=Hotspot;CNV_ID=NRAS;CNV_HS=0
chr1	115258718	115258831	SP_18.20086	.	GENE_ID=NRAS;Pool=1;PURPOSE=Hotspot;CNV_ID=NRAS;CNV_HS=0
chr1	120457923	120458050	NOTCH2_1.1.264673	.	GENE_ID=NOTCH2;Pool=2;PURPOSE=CDS;CNV_ID=NOTCH2;CNV_HS=1
chr1	120458050	120458134	NOTCH2_1.1.18674	.	GENE_ID=NOTCH2;Pool=1;PURPOSE=CDS;CNV_ID=NOTCH2;CNV_HS=1
chr1	120458083	120458215	NOTCH2_1.1.32370	.	GENE_ID=NOTCH2;Pool=2;PURPOSE=CDS;CNV_ID=NOTCH2;CNV_HS=1;TRIM_LEFT=6
chr1	120458187	120458270	NOTCH2_1.1.188832	.	GENE_ID=NOTCH2;Pool=1;PURPOSE=CDS;CNV_ID=NOTCH2;CNV_HS=1;TRIM_LEFT=7
chr1	120458250	120458345	NOTCH2_1.1.202596	.	GENE_ID=NOTCH2;Pool=2;PURPOSE=CDS;CNV_ID=NOTCH2;CNV_HS=1;TRIM_LEFT=4
chr1	120458334	120458457	NOTCH2_1.1.109883	.	GENE_ID=NOTCH2;Pool=1;PURPOSE=CDS;CNV_ID=NOTCH2;CNV_HS=1;TRIM_LEFT=3
chr1	120458404	120458537	NOTCH2_1.1.116518	.	GENE_ID=NOTCH2;Pool=2;PURPOSE=CDS;CNV_ID=NOTCH2;CNV_HS=1;TRIM_LEFT=5
chr1	120458512	120458597	NOTCH2_1.1.229114	.	GENE_ID=NOTCH2;Pool=1;PURPOSE=CDS;CNV_ID=NOTCH2;CNV_HS=1;TRIM_LEFT=6
chr1	120458575	120458707	NOTCH2_1.1.30911	.	GENE_ID=NOTCH2;Pool=2;PURPOSE=CDS;CNV_ID=NOTCH2;CNV_HS=1;TRIM_LEFT=6
chr1	120458698	120458784	NOTCH2_1.1.225614	.	GENE_ID=NOTCH2;Pool=1;PURPOSE=CDS;CNV_ID=NOTCH2;CNV_HS=1
chr1	120458747	120458845	NOTCH2_1.1.200588	.	GENE_ID=NOTCH2;Pool=2;PURPOSE=CDS;CNV_ID=NOTCH2;CNV_HS=1
chr1	120458822	120458925	NOTCH2_1.2.142751	.	GENE_ID=NOTCH2;Pool=1;PURPOSE=CDS;CNV_ID=NOTCH2;CNV_HS=1;TRIM_LEFT=4
chr1	120458888	120459008	NOTCH2_1.2.14404	.	GENE_ID=NOTCH2;Pool=2;PURPOSE=CDS;CNV_ID=NOTCH2;CNV_HS=1;TRIM_LEFT=6
chr1	120458968	120459059	NOTCH2_1.2.84672	.	GENE_ID=NOTCH2;Pool=1;PURPOSE=CDS;CNV_ID=NOTCH2;CNV_HS=1;TRIM_LEFT=6
chr1	120459040	120459160	NOTCH2_1.2.95583	.	GENE_ID=NOTCH2;Pool=2;PURPOSE=CDS;CNV_ID=NOTCH2;CNV_HS=1;TRIM_LEFT=5
chr1	120459123	120459208	NOTCH2_1.2.144339	.	GENE_ID=NOTCH2;Pool=1;PURPOSE=CDS;CNV_ID=NOTCH2;CNV_HS=1;TRIM_LEFT=6
chr1	120459192	120459322	NOTCH2_1.2.173548	.	GENE_ID=NOTCH2;Pool=2;PURPOSE=CDS;CNV_ID=NOTCH2;CNV_HS=1;TRIM_LEFT=2
chr1	120460221	120460315	NOTCH2_2.11018	.	GENE_ID=NOTCH2;Pool=1;PURPOSE=CDS;CNV_ID=NOTCH2;CNV_HS=1
chr1	120460294	120460383	NOTCH2_2.58299	.	GENE_ID=NOTCH2;Pool=2;PURPOSE=CDS;CNV_ID=NOTCH2;CNV_HS=1;TRIM_LEFT=4
chr1	120460361	120460435	NOTCH2_2.88198	.	GENE_ID=NOTCH2;Pool=1;PURPOSE=CDS;CNV_ID=NOTCH2;CNV_HS=1;TRIM_LEFT=7
chr1	120461023	120461150	NOTCH2_3.14766	.	GENE_ID=NOTCH2;Pool=2;PURPOSE=CDS;CNV_ID=NOTCH2;CNV_HS=1
chr1	120461149	120461226	NOTCH2_3.101105	.	GENE_ID=NOTCH2;Pool=1;PURPOSE=CDS;CNV_ID=NOTCH2;CNV_HS=1
chr1	120461930	120462055	NOTCH2_4.7005	.	GENE_ID=NOTCH2;Pool=2;PURPOSE=CDS;CNV_ID=NOTCH2;CNV_HS=1
chr1	120462055	120462137	NOTCH2_4.105867	.	GENE_ID=NOTCH2;Pool=1;PURPOSE=CDS;CNV_ID=NOTCH2;CNV_HS=1
chr1	120462082	120462220	NOTCH2_4.103417	.	GENE_ID=NOTCH2;Pool=2;PURPOSE=CDS;CNV_ID=NOTCH2;CNV_HS=1;TRIM_LEFT=6
chr1	120462199	120462273	NOTCH2_4.149931	.	GENE_ID=NOTCH2;Pool=1;PURPOSE=CDS;CNV_ID=NOTCH2;CNV_HS=1;TRIM_LEFT=5
chr1	120462804	120462917	NOTCH2_5.6376	.	GENE_ID=NOTCH2;Pool=2;PURPOSE=CDS;CNV_ID=NOTCH2;CNV_HS=1
chr1	120462878	120463007	NOTCH2_5.56166	.	GENE_ID=NOTCH2;Pool=1;PURPOSE=CDS;CNV_ID=NOTCH2;CNV_HS=1;TRIM_LEFT=6
chr1	120463007	120463105	NOTCH2_5.67117	.	GENE_ID=NOTCH2;Pool=2;PURPOSE=CDS;CNV_ID=NOTCH2;CNV_HS=1
chr1	120464321	120464411	NOTCH2_6.20274	.	GENE_ID=NOTCH2;Pool=1;PURPOSE=CDS;CNV_ID=NOTCH2;CNV_HS=1
chr1	120464411	120464483	NOTCH2_6.91523	.	GENE_ID=NOTCH2;Pool=2;PURPOSE=CDS;CNV_ID=NOTCH2;CNV_HS=1
chr1	120464840	120464959	NOTCH2_7.124982	.	GENE_ID=NOTCH2;Pool=1;PURPOSE=CDS;CNV_ID=NOTCH2;CNV_HS=1
chr1	120464927	120465024	NOTCH2_7.145669	.	GENE_ID=NOTCH2;Pool=2;PURPOSE=CDS;CNV_ID=NOTCH2;CNV_HS=1;TRIM_LEFT=6
chr1	120464998	120465081	NOTCH2_7.55119	.	GENE_ID=NOTCH2;Pool=1;PURPOSE=CDS;CNV_ID=NOTCH2;CNV_HS=1;TRIM_LEFT=4
chr1	120465222	120465348	NOTCH2_8.88885	.	GENE_ID=NOTCH2;Pool=2;PURPOSE=CDS;CNV_ID=NOTCH2;CNV_HS=1
chr1	120465300	120465385	NOTCH2_8.93087	.	GENE_ID=NOTCH2;Pool=1;PURPOSE=CDS;CNV_ID=NOTCH2;CNV_HS=1;TRIM_LEFT=8
chr1	120465384	120465466	NOTCH2_8.34345	.	GENE_ID=NOTCH2;Pool=2;PURPOSE=CDS;CNV_ID=NOTCH2;CNV_HS=1
chr1	120466229	120466305	NOTCH2_9.189633	.	GENE_ID=NOTCH2;Pool=1;PURPOSE=CDS;CNV_ID=NOTCH2;CNV_HS=1
chr1	120466296	120466378	NOTCH2_9.144873	.	GENE_ID=NOTCH2;Pool=2;PURPOSE=CDS;CNV_ID=NOTCH2;CNV_HS=1
chr1	120466344	120466474	NOTCH2_9.17615	.	GENE_ID=NOTCH2;Pool=1;PURPOSE=CDS;CNV_ID=NOTCH2;CNV_HS=1;TRIM_LEFT=6
chr1	120466472	120466573	NOTCH2_9.144194	.	GENE_ID=NOTCH2;Pool=2;PURPOSE=CDS;CNV_ID=NOTCH2;CNV_HS=1
chr1	120466507	120466619	NOTCH2_9.199929	.	GENE_ID=NOTCH2;Pool=1;PURPOSE=CDS;CNV_ID=NOTCH2;CNV_HS=1;TRIM_LEFT=10
chr1	120467922	120468053	NOTCH2_10.37165	.	GENE_ID=NOTCH2;Pool=2;PURPOSE=CDS;CNV_ID=NOTCH2;CNV_HS=1
chr1	120468026	120468106	NOTCH2_10.98020	.	GENE_ID=NOTCH2;Pool=1;PURPOSE=CDS;CNV_ID=NOTCH2;CNV_HS=1;TRIM_LEFT=5
chr1	120468088	120468217	NOTCH2_10.24389	.	GENE_ID=NOTCH2;Pool=2;PURPOSE=CDS;CNV_ID=NOTCH2;CNV_HS=1;TRIM_LEFT=3
chr1	120468163	120468248	NOTCH2_10.153278	.	GENE_ID=NOTCH2;Pool=1;PURPOSE=CDS;CNV_ID=NOTCH2;CNV_HS=1;TRIM_LEFT=6
chr1	120468247	120468351	NOTCH2_10.145825	.	GENE_ID=NOTCH2;Pool=2;PURPOSE=CDS;CNV_ID=NOTCH2;CNV_HS=1
chr1	120468317	120468425	NOTCH2_10.96450	.	GENE_ID=NOTCH2;Pool=1;PURPOSE=CDS;CNV_ID=NOTCH2;CNV_HS=1
chr1	120468388	120468518	NOTCH2_10.52572	.	GENE_ID=NOTCH2;Pool=2;PURPOSE=CDS;CNV_ID=NOTCH2;CNV_HS=1;TRIM_LEFT=4
chr1	120469109	120469225	NOTCH2_11.42395	.	GENE_ID=NOTCH2;Pool=1;PURPOSE=CDS;CNV_ID=NOTCH2;CNV_HS=1
chr1	120469224	120469313	NOTCH2_11.73748	.	GENE_ID=NOTCH2;Pool=2;PURPOSE=CDS;CNV_ID=NOTCH2;CNV_HS=1
chr1	120471554	120471629	NOTCH2_12.54296	.	GENE_ID=NOTCH2;Pool=1;PURPOSE=CDS;CNV_ID=NOTCH2;CNV_HS=1
chr1	120471614	120471742	NOTCH2_12.132290	.	GENE_ID=NOTCH2;Pool=2;PURPOSE=CDS;CNV_ID=NOTCH2;CNV_HS=1;TRIM_LEFT=9
chr1	120471704	120471805	NOTCH2_12.88287	.	GENE_ID=NOTCH2;Pool=1;PURPOSE=CDS;CNV_ID=NOTCH2;CNV_HS=1;TRIM_LEFT=7
chr1	120471783	120471863	NOTCH2_12.71579	.	GENE_ID=NOTCH2;Pool=2;PURPOSE=CDS;CNV_ID=NOTCH2;CNV_HS=1;TRIM_LEFT=4
chr1	120477988	120478061	NOTCH2_13.109668	.	GENE_ID=NOTCH2;Pool=1;PURPOSE=CDS;CNV_ID=NOTCH2;CNV_HS=1
chr1	120478049	120478127	NOTCH2_13.68947	.	GENE_ID=NOTCH2;Pool=2;PURPOSE=CDS;CNV_ID=NOTCH2;CNV_HS=1;TRIM_LEFT=4
chr1	120478102	120478230	NOTCH2_13.108845	.	GENE_ID=NOTCH2;Pool=1;PURPOSE=CDS;CNV_ID=NOTCH2;CNV_HS=1;TRIM_LEFT=9
chr1	120478217	120478293	NOTCH2_13.77384	.	GENE_ID=NOTCH2;Pool=2;PURPOSE=CDS;CNV_ID=NOTCH2;CNV_HS=1;TRIM_LEFT=6
chr1	120479867	120479966	NOTCH2_14.95720	.	GENE_ID=NOTCH2;Pool=1;PURPOSE=CDS;CNV_ID=NOTCH2;CNV_HS=1
chr1	120479939	120480020	NOTCH2_14.104543	.	GENE_ID=NOTCH2;Pool=2;PURPOSE=CDS;CNV_ID=NOTCH2;CNV_HS=1;TRIM_LEFT=8
chr1	120479999	120480094	NOTCH2_14.121101	.	GENE_ID=NOTCH2;Pool=1;PURPOSE=CDS;CNV_ID=NOTCH2;CNV_HS=1;TRIM_LEFT=8
chr1	120480431	120480508	NOTCH2_15.104242	.	GENE_ID=NOTCH2;Pool=2;PURPOSE=CDS;CNV_ID=NOTCH2;CNV_HS=1
chr1	120480492	120480638	NOTCH2_15.81659	.	GENE_ID=NOTCH2;Pool=1;PURPOSE=CDS;CNV_ID=NOTCH2;CNV_HS=1;TRIM_LEFT=5
chr1	120483146	120483244	NOTCH2_16.30344	.	GENE_ID=NOTCH2;Pool=2;PURPOSE=CDS;CNV_ID=NOTCH2;CNV_HS=1
chr1	120483239	120483327	NOTCH2_16.110692	.	GENE_ID=NOTCH2;Pool=1;PURPOSE=CDS;CNV_ID=NOTCH2;CNV_HS=1
chr1	120483282	120483387	NOTCH2_16.56618	.	GENE_ID=NOTCH2;Pool=2;PURPOSE=CDS;CNV_ID=NOTCH2;CNV_HS=1;TRIM_LEFT=7
chr1	120484129	120484257	NOTCH2_17.188342	.	GENE_ID=NOTCH2;Pool=1;PURPOSE=CDS;CNV_ID=NOTCH2;CNV_HS=1
chr1	120484241	120484329	NOTCH2_17.3111	.	GENE_ID=NOTCH2;Pool=2;PURPOSE=CDS;CNV_ID=NOTCH2;CNV_HS=1;TRIM_LEFT=6
chr1	120484299	120484392	NOTCH2_17.81393	.	GENE_ID=NOTCH2;Pool=1;PURPOSE=CDS;CNV_ID=NOTCH2;CNV_HS=1;TRIM_LEFT=5
chr1	120490926	120491040	NOTCH2_18.2477	.	GENE_ID=NOTCH2;Pool=2;PURPOSE=CDS;CNV_ID=NOTCH2;CNV_HS=1
chr1	120491039	120491173	NOTCH2_18.82691	.	GENE_ID=NOTCH2;Pool=1;PURPOSE=CDS;CNV_ID=NOTCH2;CNV_HS=1
chr1	120491173	120491263	NOTCH2_18.68093	.	GENE_ID=NOTCH2;Pool=2;PURPOSE=CDS;CNV_ID=NOTCH2;CNV_HS=1
chr1	120491612	120491730	NOTCH2_19.106642	.	GENE_ID=NOTCH2;Pool=1;PURPOSE=CDS;CNV_ID=NOTCH2;CNV_HS=1
chr1	120491692	120491804	NOTCH2_19.38466	.	GENE_ID=NOTCH2;Pool=2;PURPOSE=CDS;CNV_ID=NOTCH2;CNV_HS=1;TRIM_LEFT=6
chr1	120493312	120493436	NOTCH2_20.39859	.	GENE_ID=NOTCH2;Pool=1;PURPOSE=CDS;CNV_ID=NOTCH2;CNV_HS=1
chr1	120493409	120493485	NOTCH2_20.96073	.	GENE_ID=NOTCH2;Pool=2;PURPOSE=CDS;CNV_ID=NOTCH2;CNV_HS=1;TRIM_LEFT=6
chr1	120496117	120496204	NOTCH2_21.99385	.	GENE_ID=NOTCH2;Pool=1;PURPOSE=CDS;CNV_ID=NOTCH2;CNV_HS=1
chr1	120496182	120496252	NOTCH2_21.132237	.	GENE_ID=NOTCH2;Pool=2;PURPOSE=CDS;CNV_ID=NOTCH2;CNV_HS=1;TRIM_LEFT=4
chr1	120496243	120496362	NOTCH2_21.61011	.	GENE_ID=NOTCH2;Pool=1;PURPOSE=CDS;CNV_ID=NOTCH2;CNV_HS=1;TRIM_LEFT=6
chr1	120497650	120497772	NOTCH2_22.11635	.	GENE_ID=NOTCH2;Pool=2;PURPOSE=CDS;CNV_ID=NOTCH2;CNV_HS=1
chr1	120497731	120497814	NOTCH2_22.109577	.	GENE_ID=NOTCH2;Pool=1;PURPOSE=CDS;CNV_ID=NOTCH2;CNV_HS=1;TRIM_LEFT=5
chr1	120497809	120497889	NOTCH2_22.32864	.	GENE_ID=NOTCH2;Pool=2;PURPOSE=CDS;CNV_ID=NOTCH2;CNV_HS=1
chr1	120501985	120502060	NOTCH2_23.104014	.	GENE_ID=NOTCH2;Pool=1;PURPOSE=CDS;CNV_ID=NOTCH2;CNV_HS=1
chr1	120502048	120502131	NOTCH2_23.111484	.	GENE_ID=NOTCH2;Pool=2;PURPOSE=CDS;CNV_ID=NOTCH2;CNV_HS=1;TRIM_LEFT=6
chr1	120506190	120506313	NOTCH2_24.81677	.	GENE_ID=NOTCH2;Pool=1;PURPOSE=CDS;CNV_ID=NOTCH2;CNV_HS=1
chr1	120506301	120506379	NOTCH2_24.143384	.	GENE_ID=NOTCH2;Pool=2;PURPOSE=CDS;CNV_ID=NOTCH2;CNV_HS=1
chr1	120506347	120506443	NOTCH2_24.176290	.	GENE_ID=NOTCH2;Pool=1;PURPOSE=CDS;CNV_ID=NOTCH2;CNV_HS=1;TRIM_LEFT=3
chr1	120508066	120508190	NOTCH2_25.53366	.	GENE_ID=NOTCH2;Pool=2;PURPOSE=CDS;CNV_ID=NOTCH2;CNV_HS=1
chr1	120508175	120508244	NOTCH2_25.5029	.	GENE_ID=NOTCH2;Pool=1;PURPOSE=CDS;CNV_ID=NOTCH2;CNV_HS=1;TRIM_LEFT=7
chr1	120508976	120509097	NOTCH2_26.124621	.	GENE_ID=NOTCH2;Pool=2;PURPOSE=CDS;CNV_ID=NOTCH2;CNV_HS=1
chr1	120509044	120509124	NOTCH2_26.76354	.	GENE_ID=NOTCH2;Pool=1;PURPOSE=CDS;CNV_ID=NOTCH2;CNV_HS=1;TRIM_LEFT=4
chr1	120510044	120510124	NOTCH2_27.85907	.	GENE_ID=NOTCH2;Pool=2;PURPOSE=CDS;CNV_ID=NOTCH2;CNV_HS=1
chr1	120510112	120510195	NOTCH2_27.147954	.	GENE_ID=NOTCH2;Pool=1;PURPOSE=CDS;CNV_ID=NOTCH2;CNV_HS=1;TRIM_LEFT=3
chr1	120510167	120510251	NOTCH2_27.38651	.	GENE_ID=NOTCH2;Pool=2;PURPOSE=CDS;CNV_ID=NOTCH2;CNV_HS=1;TRIM_LEFT=5
chr1	120510688	120510766	NOTCH2_28.15824	.	GENE_ID=NOTCH2;Pool=1;PURPOSE=CDS;CNV_ID=NOTCH2;CNV_HS=1
chr1	120510704	120510832	NOTCH2_28.2343	.	GENE_ID=NOTCH2;Pool=2;PURPOSE=CDS;CNV_ID=NOTCH2;CNV_HS=1;TRIM_LEFT=6
chr1	120510831	120510950	NOTCH2_28.119975	.	GENE_ID=NOTCH2;Pool=1;PURPOSE=CDS;CNV_ID=NOTCH2;CNV_HS=1
chr1	120512127	120512256	NOTCH2_29.124005	.	GENE_ID=NOTCH2;Pool=2;PURPOSE=CDS;CNV_ID=NOTCH2;CNV_HS=1
chr1	120512247	120512358	NOTCH2_29.29305	.	GENE_ID=NOTCH2;Pool=1;PURPOSE=CDS;CNV_ID=NOTCH2;CNV_HS=1
chr1	120512290	120512375	NOTCH2_29.18828	.	GENE_ID=NOTCH2;Pool=2;PURPOSE=CDS;CNV_ID=NOTCH2;CNV_HS=1;TRIM_LEFT=6
chr1	120529560	120529640	NOTCH2_30.76480	.	GENE_ID=NOTCH2;Pool=1;PURPOSE=CDS;CNV_ID=NOTCH2;CNV_HS=1
chr1	120529581	120529697	NOTCH2_30.97685	.	GENE_ID=NOTCH2;Pool=2;PURPOSE=CDS;CNV_ID=NOTCH2;CNV_HS=1;TRIM_LEFT=3
chr1	120529695	120529771	NOTCH2_30.20393	.	GENE_ID=NOTCH2;Pool=1;PURPOSE=CDS;CNV_ID=NOTCH2;CNV_HS=1
chr1	120539524	120539624	NOTCH2_31.72509	.	GENE_ID=NOTCH2;Pool=2;PURPOSE=CDS;CNV_ID=NOTCH2;CNV_HS=1
chr1	120539624	120539772	NOTCH2_31.31356	.	GENE_ID=NOTCH2;Pool=1;PURPOSE=CDS;CNV_ID=NOTCH2;CNV_HS=1
chr1	120539681	120539793	NOTCH2_31.14176	.	GENE_ID=NOTCH2;Pool=2;PURPOSE=CDS;CNV_ID=NOTCH2;CNV_HS=1;TRIM_LEFT=6
chr1	120539799	120539944	NOTCH2_31.133184	.	GENE_ID=NOTCH2;Pool=1;PURPOSE=CDS;CNV_ID=NOTCH2;CNV_HS=1
chr1	120539831	120539960	NOTCH2_31.117349	.	GENE_ID=NOTCH2;Pool=2;PURPOSE=CDS;CNV_ID=NOTCH2;CNV_HS=1;TRIM_LEFT=6
chr1	120547975	120548124	NOTCH2_32.19081	.	GENE_ID=NOTCH2;Pool=1;PURPOSE=CDS;CNV_ID=NOTCH2;CNV_HS=1
chr1	120548019	120548164	NOTCH2_32.157022	.	GENE_ID=NOTCH2;Pool=2;PURPOSE=CDS;CNV_ID=NOTCH2;CNV_HS=1;TRIM_LEFT=8
chr1	120611942	120612056	NOTCH2_34.5445	.	GENE_ID=NOTCH2;Pool=1;PURPOSE=CDS;CNV_ID=NOTCH2;CNV_HS=1;TRIM_LEFT=200
chr1	156785511	156785630	NTRK1_1.11378	.	GENE_ID=NTRK1;Pool=2;PURPOSE=CNV,Hotspot;CNV_ID=NTRK1;CNV_HS=1
chr1	156834086	156834208	SP_19.120215	.	GENE_ID=NTRK1;Pool=1;PURPOSE=CNV,Hotspot;CNV_ID=NTRK1;CNV_HS=1
chr1	156834549	156834671	SP_19.131355	.	GENE_ID=NTRK1;Pool=2;PURPOSE=CNV,Hotspot;CNV_ID=NTRK1;CNV_HS=1
chr1	156838270	156838402	SP_20.9941	.	GENE_ID=NTRK1;Pool=1;PURPOSE=CNV,Hotspot;CNV_ID=NTRK1;CNV_HS=1
chr1	156843536	156843630	SP_21.51335	.	GENE_ID=NTRK1;Pool=2;PURPOSE=CNV,Hotspot;CNV_ID=NTRK1;CNV_HS=1
chr1	156843576	156843705	SP_21.53430	.	GENE_ID=NTRK1;Pool=1;PURPOSE=CNV,Hotspot;CNV_ID=NTRK1;CNV_HS=1;TRIM_LEFT=5
chr1	156843702	156843841	NTRK1_10.82787	.	GENE_ID=NTRK1;Pool=2;PURPOSE=CNV,Hotspot;CNV_ID=NTRK1;CNV_HS=1
chr1	156844656	156844782	SP_22.13367	.	GENE_ID=NTRK1;Pool=1;PURPOSE=CNV,Hotspot;CNV_ID=NTRK1;CNV_HS=1
chr1	156846217	156846354	SP_23.28464	.	GENE_ID=NTRK1;Pool=2;PURPOSE=CNV,Hotspot;CNV_ID=NTRK1;CNV_HS=1
chr1	156849080	156849209	SP_24.15561	.	GENE_ID=NTRK1;Pool=1;PURPOSE=CNV,Hotspot;CNV_ID=NTRK1;CNV_HS=1
chr1	156851284	156851413	SP_25.9158	.	GENE_ID=NTRK1;Pool=2;PURPOSE=CNV,Hotspot;CNV_ID=NTRK1;CNV_HS=1
chr1	162724519	162724643	SP_26.32259	.	GENE_ID=DDR2;Pool=1;PURPOSE=Hotspot;CNV_ID=DDR2;CNV_HS=0
chr1	162729596	162729706	ON_DDR2_3	.	GENE_ID=DDR2;Pool=1;PURPOSE=Hotspot;CNV_ID=DDR2;CNV_HS=0
chr1	162729659	162729751	SP_27.7165	.	GENE_ID=DDR2;Pool=2;PURPOSE=Hotspot;CNV_ID=DDR2;CNV_HS=0;TRIM_LEFT=8
chr1	162741929	162742047	DDR2_1.20748	.	GENE_ID=DDR2;Pool=1;PURPOSE=Hotspot;CNV_ID=DDR2;CNV_HS=0
chr1	162743228	162743298	DDR2_2.21163	.	GENE_ID=DDR2;Pool=2;PURPOSE=Hotspot;CNV_ID=DDR2;CNV_HS=0
chr1	162743271	162743386	DDR2_2.97498	.	GENE_ID=DDR2;Pool=1;PURPOSE=Hotspot;CNV_ID=DDR2;CNV_HS=0;TRIM_LEFT=3
chr1	162745430	162745506	DDR2_3.92637	.	GENE_ID=DDR2;Pool=2;PURPOSE=Hotspot;CNV_ID=DDR2;CNV_HS=0
chr1	162745484	162745555	DDR2_3.16302	.	GENE_ID=DDR2;Pool=1;PURPOSE=Hotspot;CNV_ID=DDR2;CNV_HS=0;TRIM_LEFT=6
chr1	162745548	162745669	DDR2_3.81084	.	GENE_ID=DDR2;Pool=2;PURPOSE=Hotspot;CNV_ID=DDR2;CNV_HS=0;TRIM_LEFT=3
chr1	162745924	162746004	DDR2_4.17946	.	GENE_ID=DDR2;Pool=1;PURPOSE=Hotspot;CNV_ID=DDR2;CNV_HS=0
chr1	162746004	162746076	DDR2_4.69299	.	GENE_ID=DDR2;Pool=2;PURPOSE=Hotspot;CNV_ID=DDR2;CNV_HS=0
chr1	162746050	162746160	DDR2_4.158263	.	GENE_ID=DDR2;Pool=1;PURPOSE=Hotspot;CNV_ID=DDR2;CNV_HS=0;TRIM_LEFT=2
chr1	162748358	162748478	DDR2_5.39469	.	GENE_ID=DDR2;Pool=2;PURPOSE=Hotspot;CNV_ID=DDR2;CNV_HS=0
chr1	162748448	162748524	DDR2_5.12913	.	GENE_ID=DDR2;Pool=1;PURPOSE=Hotspot;CNV_ID=DDR2;CNV_HS=0;TRIM_LEFT=3
chr1	162749840	162749919	DDR2_6.24475	.	GENE_ID=DDR2;Pool=2;PURPOSE=Hotspot;CNV_ID=DDR2;CNV_HS=0
chr1	162749908	162750018	DDR2_6.112635	.	GENE_ID=DDR2;Pool=1;PURPOSE=Hotspot;CNV_ID=DDR2;CNV_HS=0;TRIM_LEFT=7
chr1	162749989	162750078	DDR2_6.5570	.	GENE_ID=DDR2;Pool=2;PURPOSE=Hotspot;CNV_ID=DDR2;CNV_HS=0;TRIM_LEFT=5
chr1	204494575	204494697	MDM4_1.53830	.	GENE_ID=MDM4;Pool=1;PURPOSE=CNV,Hotspot;CNV_ID=MDM4;CNV_HS=1
chr1	204495444	204495559	MDM4_2.40726	.	GENE_ID=MDM4;Pool=2;PURPOSE=CNV,Hotspot;CNV_ID=MDM4;CNV_HS=1
chr1	204501277	204501401	MDM4_4.37411	.	GENE_ID=MDM4;Pool=1;PURPOSE=CNV,Hotspot;CNV_ID=MDM4;CNV_HS=1
chr1	204506515	204506638	SP_29.36152	.	GENE_ID=MDM4;Pool=2;PURPOSE=CNV,Hotspot;CNV_ID=MDM4;CNV_HS=1
chr1	204507397	204507520	MDM4_6.17534	.	GENE_ID=MDM4;Pool=1;PURPOSE=CNV,Hotspot;CNV_ID=MDM4;CNV_HS=1
chr1	204512035	204512124	MDM4_7.21849	.	GENE_ID=MDM4;Pool=2;PURPOSE=CNV,Hotspot;CNV_ID=MDM4;CNV_HS=1
chr1	204513676	204513796	MDM4_8.136024	.	GENE_ID=MDM4;Pool=1;PURPOSE=CNV,Hotspot;CNV_ID=MDM4;CNV_HS=1
chr1	204518227	204518339	MDM4_10.262225	.	GENE_ID=MDM4;Pool=2;PURPOSE=CNV,Hotspot;CNV_ID=MDM4;CNV_HS=1
chr1	204518380	204518495	MDM4_10.155256	.	GENE_ID=MDM4;Pool=1;PURPOSE=CNV,Hotspot;CNV_ID=MDM4;CNV_HS=1
chr1	204518619	204518712	MDM4_10.179074	.	GENE_ID=MDM4;Pool=2;PURPOSE=CNV,Hotspot;CNV_ID=MDM4;CNV_HS=1
chr1	226252021	226252158	SP_30.8892	.	GENE_ID=H3F3A;Pool=1;PURPOSE=Hotspot;CNV_ID=H3F3A;CNV_HS=0
chr1	243662991	243663088	AKT3_1.56376	.	GENE_ID=AKT3;Pool=2;PURPOSE=CNV,Hotspot;CNV_ID=AKT3;CNV_HS=1
chr1	243708866	243708980	AKT3_4.37614	.	GENE_ID=AKT3;Pool=1;PURPOSE=CNV,Hotspot;CNV_ID=AKT3;CNV_HS=1
chr1	243716094	243716215	AKT3_5.23955	.	GENE_ID=AKT3;Pool=2;PURPOSE=CNV,Hotspot;CNV_ID=AKT3;CNV_HS=1
chr1	243716202	243716322	SP_31.16518	.	GENE_ID=AKT3;Pool=1;PURPOSE=CNV,Hotspot;CNV_ID=AKT3;CNV_HS=1;TRIM_LEFT=8
chr1	243736247	243736359	AKT3_7.95981	.	GENE_ID=AKT3;Pool=2;PURPOSE=CNV,Hotspot;CNV_ID=AKT3;CNV_HS=1
chr1	243778394	243778478	AKT3_9.8855	.	GENE_ID=AKT3;Pool=1;PURPOSE=CNV,Hotspot;CNV_ID=AKT3;CNV_HS=1
chr1	243809138	243809257	AKT3_11.41467	.	GENE_ID=AKT3;Pool=2;PURPOSE=CNV,Hotspot;CNV_ID=AKT3;CNV_HS=1
chr1	243828041	243828112	AKT3_12.3558	.	GENE_ID=AKT3;Pool=1;PURPOSE=CNV,Hotspot;CNV_ID=AKT3;CNV_HS=1
chr1	243828084	243828160	SP_32.1729	.	GENE_ID=AKT3;Pool=2;PURPOSE=CNV,Hotspot;CNV_ID=AKT3;CNV_HS=1
chr1	243858813	243858921	SP_33.40092	.	GENE_ID=AKT3;Pool=1;PURPOSE=CNV,Hotspot;CNV_ID=AKT3;CNV_HS=1
chr1	243858983	243859103	SP_33.26253	.	GENE_ID=AKT3;Pool=2;PURPOSE=CNV,Hotspot;CNV_ID=AKT3;CNV_HS=1
chr2	16082140	16082254	MYCN_1.41120	.	GENE_ID=MYCN;Pool=1;PURPOSE=CNV,Hotspot;CNV_ID=MYCN;CNV_HS=1
chr2	16082250	16082336	MYCN_1.654	.	GENE_ID=MYCN;Pool=2;PURPOSE=CNV,Hotspot;CNV_ID=MYCN;CNV_HS=1
chr2	16082288	16082420	SP_109.12845	.	GENE_ID=MYCN;Pool=1;PURPOSE=CNV,Hotspot;CNV_ID=MYCN;CNV_HS=1;TRIM_LEFT=3
chr2	16082420	16082561	MYCN_1.8725	.	GENE_ID=MYCN;Pool=2;PURPOSE=CNV,Hotspot;CNV_ID=MYCN;CNV_HS=1
chr2	16082871	16082980	MYCN_1.31840	.	GENE_ID=MYCN;Pool=1;PURPOSE=CNV,Hotspot;CNV_ID=MYCN;CNV_HS=1
chr2	16085594	16085703	MYCN_2.243665	.	GENE_ID=MYCN;Pool=2;PURPOSE=CNV,Hotspot;CNV_ID=MYCN;CNV_HS=1
chr2	16085669	16085783	MYCN_2.145925	.	GENE_ID=MYCN;Pool=1;PURPOSE=CNV,Hotspot;CNV_ID=MYCN;CNV_HS=1;TRIM_LEFT=6
chr2	16085739	16085870	MYCN_2.57629	.	GENE_ID=MYCN;Pool=2;PURPOSE=CNV,Hotspot;CNV_ID=MYCN;CNV_HS=1
chr2	16085935	16086057	MYCN_2.101198	.	GENE_ID=MYCN;Pool=1;PURPOSE=CNV,Hotspot;CNV_ID=MYCN;CNV_HS=1
chr2	16086044	16086172	MYCN_2.143254	.	GENE_ID=MYCN;Pool=2;PURPOSE=CNV,Hotspot;CNV_ID=MYCN;CNV_HS=1
chr2	29419630	29419717	ALK_1.8694	.	GENE_ID=ALK;Pool=1;PURPOSE=CNV,Hotspot;CNV_ID=ALK;CNV_HS=1
chr2	29419678	29419807	ALK_1.18820	.	GENE_ID=ALK;Pool=2;PURPOSE=CNV,Hotspot;CNV_ID=ALK;CNV_HS=1;TRIM_LEFT=5
chr2	29420405	29420514	ALK_2.33476	.	GENE_ID=ALK;Pool=1;PURPOSE=CNV,Hotspot;CNV_ID=ALK;CNV_HS=1
chr2	29420478	29420555	ALK_2.42361	.	GENE_ID=ALK;Pool=2;PURPOSE=CNV,Hotspot;CNV_ID=ALK;CNV_HS=1;TRIM_LEFT=7
chr2	29430035	29430145	ALK_3.32178	.	GENE_ID=ALK;Pool=1;PURPOSE=CNV,Hotspot;CNV_ID=ALK;CNV_HS=1
chr2	29432579	29432667	ALK_4.22883	.	GENE_ID=ALK;Pool=2;PURPOSE=CNV,Hotspot;CNV_ID=ALK;CNV_HS=1
chr2	29432654	29432778	ALK_4.65385	.	GENE_ID=ALK;Pool=1;PURPOSE=CNV,Hotspot;CNV_ID=ALK;CNV_HS=1
chr2	29436766	29436863	ALK_5.40065	.	GENE_ID=ALK;Pool=2;PURPOSE=CNV,Hotspot;CNV_ID=ALK;CNV_HS=1
chr2	29436861	29436982	ALK_5.67599	.	GENE_ID=ALK;Pool=1;PURPOSE=CNV,Hotspot;CNV_ID=ALK;CNV_HS=1
chr2	29443570	29443695	ALK_6.20619	.	GENE_ID=ALK;Pool=2;PURPOSE=CNV,Hotspot;CNV_ID=ALK;CNV_HS=1
chr2	29443688	29443769	ALK_6.24845	.	GENE_ID=ALK;Pool=1;PURPOSE=CNV,Hotspot;CNV_ID=ALK;CNV_HS=1
chr2	29445149	29445247	ALK_7.19434	.	GENE_ID=ALK;Pool=2;PURPOSE=CNV,Hotspot;CNV_ID=ALK;CNV_HS=1
chr2	29445246	29445360	ALK_7.61973	.	GENE_ID=ALK;Pool=1;PURPOSE=CNV,Hotspot;CNV_ID=ALK;CNV_HS=1
chr2	29445343	29445474	ALK_8.26770	.	GENE_ID=ALK;Pool=2;PURPOSE=CNV,Hotspot;CNV_ID=ALK;CNV_HS=1;TRIM_LEFT=5
chr2	29446171	29446279	ALK_9.6962	.	GENE_ID=ALK;Pool=1;PURPOSE=CNV,Hotspot;CNV_ID=ALK;CNV_HS=1
chr2	47630308	47630435	OCP1_MSH2_1	.	GENE_ID=MSH2;Pool=2;PURPOSE=CDS;CNV_ID=MSH2;CNV_HS=1
chr2	47630400	47630515	OCP1_MSH2_2	.	GENE_ID=MSH2;Pool=1;PURPOSE=CDS;CNV_ID=MSH2;CNV_HS=1;TRIM_LEFT=5
chr2	47630504	47630595	OCP1_MSH2_3	.	GENE_ID=MSH2;Pool=2;PURPOSE=CDS;CNV_ID=MSH2;CNV_HS=1;TRIM_LEFT=3
chr2	47635516	47635601	MSH2_1.46606	.	GENE_ID=MSH2;Pool=1;PURPOSE=CDS;CNV_ID=MSH2;CNV_HS=1
chr2	47635590	47635675	OCP1_MSH2_5	.	GENE_ID=MSH2;Pool=2;PURPOSE=CDS;CNV_ID=MSH2;CNV_HS=1;TRIM_LEFT=3
chr2	47635665	47635783	MSH2_1.34172	.	GENE_ID=MSH2;Pool=1;PURPOSE=CDS;CNV_ID=MSH2;CNV_HS=1;TRIM_LEFT=7
chr2	47637167	47637274	OCP1_MSH2_7	.	GENE_ID=MSH2;Pool=2;PURPOSE=CDS;CNV_ID=MSH2;CNV_HS=1
chr2	47637245	47637348	OCP1_MSH2_8	.	GENE_ID=MSH2;Pool=1;PURPOSE=CDS;CNV_ID=MSH2;CNV_HS=1;TRIM_LEFT=10
chr2	47637337	47637442	OCP1_MSH2_9	.	GENE_ID=MSH2;Pool=2;PURPOSE=CDS;CNV_ID=MSH2;CNV_HS=1;TRIM_LEFT=7
chr2	47637431	47637536	OCP1_MSH2_10	.	GENE_ID=MSH2;Pool=1;PURPOSE=CDS;CNV_ID=MSH2;CNV_HS=1;TRIM_LEFT=9
chr2	47639523	47639604	OCP1_MSH2_11	.	GENE_ID=MSH2;Pool=2;PURPOSE=CDS;CNV_ID=MSH2;CNV_HS=1
chr2	47639590	47639684	OCP1_MSH2_12	.	GENE_ID=MSH2;Pool=1;PURPOSE=CDS;CNV_ID=MSH2;CNV_HS=1;TRIM_LEFT=5
chr2	47639684	47639797	MSH2_3.14556	.	GENE_ID=MSH2;Pool=2;PURPOSE=CDS;CNV_ID=MSH2;CNV_HS=1
chr2	47641372	47641451	OCP1_MSH2_14	.	GENE_ID=MSH2;Pool=1;PURPOSE=CDS;CNV_ID=MSH2;CNV_HS=1
chr2	47641423	47641536	OCP1_MSH2_15	.	GENE_ID=MSH2;Pool=2;PURPOSE=CDS;CNV_ID=MSH2;CNV_HS=1
chr2	47643378	47643473	OCP1_MSH2_16	.	GENE_ID=MSH2;Pool=1;PURPOSE=CDS;CNV_ID=MSH2;CNV_HS=1
chr2	47643462	47643544	OCP1_MSH2_17	.	GENE_ID=MSH2;Pool=2;PURPOSE=CDS;CNV_ID=MSH2;CNV_HS=1;TRIM_LEFT=8
chr2	47643533	47643605	OCP1_MSH2_18	.	GENE_ID=MSH2;Pool=1;PURPOSE=CDS;CNV_ID=MSH2;CNV_HS=1;TRIM_LEFT=9
chr2	47656786	47656903	MSH2_4.45067	.	GENE_ID=MSH2;Pool=2;PURPOSE=CDS;CNV_ID=MSH2;CNV_HS=1
chr2	47656901	47656969	OCP1_MSH2_20	.	GENE_ID=MSH2;Pool=1;PURPOSE=CDS;CNV_ID=MSH2;CNV_HS=1
chr2	47656958	47657036	OCP1_MSH2_21	.	GENE_ID=MSH2;Pool=2;PURPOSE=CDS;CNV_ID=MSH2;CNV_HS=1
chr2	47657025	47657133	OCP1_MSH2_22	.	GENE_ID=MSH2;Pool=1;PURPOSE=CDS;CNV_ID=MSH2;CNV_HS=1;TRIM_LEFT=2
chr2	47672615	47672731	OCP1_MSH2_23	.	GENE_ID=MSH2;Pool=2;PURPOSE=CDS;CNV_ID=MSH2;CNV_HS=1
chr2	47672718	47672822	OCP1_MSH2_24	.	GENE_ID=MSH2;Pool=1;PURPOSE=CDS;CNV_ID=MSH2;CNV_HS=1;TRIM_LEFT=4
chr2	47690160	47690241	OCP1_MSH2_25	.	GENE_ID=MSH2;Pool=2;PURPOSE=CDS;CNV_ID=MSH2;CNV_HS=1
chr2	47690230	47690337	OCP1_MSH2_26	.	GENE_ID=MSH2;Pool=1;PURPOSE=CDS;CNV_ID=MSH2;CNV_HS=1;TRIM_LEFT=8
chr2	47693767	47693847	MSH2_5.7399	.	GENE_ID=MSH2;Pool=2;PURPOSE=CDS;CNV_ID=MSH2;CNV_HS=1
chr2	47693846	47693967	MSH2_5.33899	.	GENE_ID=MSH2;Pool=1;PURPOSE=CDS;CNV_ID=MSH2;CNV_HS=1
chr2	47698043	47698139	OCP1_MSH2_29	.	GENE_ID=MSH2;Pool=2;PURPOSE=CDS;CNV_ID=MSH2;CNV_HS=1
chr2	47698128	47698215	OCP1_MSH2_30	.	GENE_ID=MSH2;Pool=1;PURPOSE=CDS;CNV_ID=MSH2;CNV_HS=1;TRIM_LEFT=5
chr2	47702080	47702187	OCP1_MSH2_31	.	GENE_ID=MSH2;Pool=2;PURPOSE=CDS;CNV_ID=MSH2;CNV_HS=1
chr2	47702176	47702277	OCP1_MSH2_32	.	GENE_ID=MSH2;Pool=1;PURPOSE=CDS;CNV_ID=MSH2;CNV_HS=1;TRIM_LEFT=3
chr2	47702266	47702386	OCP1_MSH2_33	.	GENE_ID=MSH2;Pool=2;PURPOSE=CDS;CNV_ID=MSH2;CNV_HS=1;TRIM_LEFT=4
chr2	47702380	47702493	MSH2_7.45942	.	GENE_ID=MSH2;Pool=1;PURPOSE=CDS;CNV_ID=MSH2;CNV_HS=1;TRIM_LEFT=2
chr2	47703418	47703540	OCP1_MSH2_35	.	GENE_ID=MSH2;Pool=2;PURPOSE=CDS;CNV_ID=MSH2;CNV_HS=1
chr2	47703529	47703648	OCP1_MSH2_36	.	GENE_ID=MSH2;Pool=1;PURPOSE=CDS;CNV_ID=MSH2;CNV_HS=1;TRIM_LEFT=8
chr2	47703637	47703746	OCP1_MSH2_37	.	GENE_ID=MSH2;Pool=2;PURPOSE=CDS;CNV_ID=MSH2;CNV_HS=1;TRIM_LEFT=4
chr2	47705405	47705475	OCP1_MSH2_38	.	GENE_ID=MSH2;Pool=1;PURPOSE=CDS;CNV_ID=MSH2;CNV_HS=1
chr2	47705464	47705544	OCP1_MSH2_39	.	GENE_ID=MSH2;Pool=2;PURPOSE=CDS;CNV_ID=MSH2;CNV_HS=1;TRIM_LEFT=8
chr2	47705530	47705623	OCP1_MSH2_40	.	GENE_ID=MSH2;Pool=1;PURPOSE=CDS;CNV_ID=MSH2;CNV_HS=1;TRIM_LEFT=3
chr2	47705612	47705686	OCP1_MSH2_41	.	GENE_ID=MSH2;Pool=2;PURPOSE=CDS;CNV_ID=MSH2;CNV_HS=1;TRIM_LEFT=9
chr2	47707806	47707931	OCP1_MSH2_42	.	GENE_ID=MSH2;Pool=1;PURPOSE=CDS;CNV_ID=MSH2;CNV_HS=1
chr2	47707920	47708035	OCP1_MSH2_43	.	GENE_ID=MSH2;Pool=2;PURPOSE=CDS;CNV_ID=MSH2;CNV_HS=1;TRIM_LEFT=5
chr2	47709859	47709930	OCP1_MSH2_44	.	GENE_ID=MSH2;Pool=1;PURPOSE=CDS;CNV_ID=MSH2;CNV_HS=1
chr2	47709916	47710012	OCP1_MSH2_45	.	GENE_ID=MSH2;Pool=2;PURPOSE=CDS;CNV_ID=MSH2;CNV_HS=1;TRIM_LEFT=5
chr2	47709992	47710103	OCP1_MSH2_46	.	GENE_ID=MSH2;Pool=1;PURPOSE=CDS;CNV_ID=MSH2;CNV_HS=1;TRIM_LEFT=7
chr2	48010362	48010452	MSH6_1.13009	.	GENE_ID=MSH6;Pool=2;PURPOSE=CDS;CNV_ID=MSH6;CNV_HS=1
chr2	48010440	48010577	MSH6_1.24823	.	GENE_ID=MSH6;Pool=1;PURPOSE=CDS;CNV_ID=MSH6;CNV_HS=1;TRIM_LEFT=6
chr2	48010527	48010626	MSH6_1.14842	.	GENE_ID=MSH6;Pool=2;PURPOSE=CDS;CNV_ID=MSH6;CNV_HS=1;TRIM_LEFT=16
chr2	48010608	48010699	MSH6_1.9166	.	GENE_ID=MSH6;Pool=1;PURPOSE=CDS;CNV_ID=MSH6;CNV_HS=1;TRIM_LEFT=3
chr2	48018028	48018156	MSH6_2.3043	.	GENE_ID=MSH6;Pool=2;PURPOSE=CDS;CNV_ID=MSH6;CNV_HS=1
chr2	48018077	48018203	MSH6_2.40532	.	GENE_ID=MSH6;Pool=1;PURPOSE=CDS;CNV_ID=MSH6;CNV_HS=1;TRIM_LEFT=4
chr2	48018191	48018320	MSH6_2.11492	.	GENE_ID=MSH6;Pool=2;PURPOSE=CDS;CNV_ID=MSH6;CNV_HS=1;TRIM_LEFT=2
chr2	48023025	48023146	MSH6_3.42685	.	GENE_ID=MSH6;Pool=1;PURPOSE=CDS;CNV_ID=MSH6;CNV_HS=1
chr2	48023110	48023223	MSH6_3.55113	.	GENE_ID=MSH6;Pool=2;PURPOSE=CDS;CNV_ID=MSH6;CNV_HS=1
chr2	48025671	48025790	MSH6_4.1.391708	.	GENE_ID=MSH6;Pool=1;PURPOSE=CDS;CNV_ID=MSH6;CNV_HS=1
chr2	48025752	48025881	MSH6_4.1.432790	.	GENE_ID=MSH6;Pool=2;PURPOSE=CDS;CNV_ID=MSH6;CNV_HS=1;TRIM_LEFT=7
chr2	48025839	48025915	MSH6_4.1.147237	.	GENE_ID=MSH6;Pool=1;PURPOSE=CDS;CNV_ID=MSH6;CNV_HS=1;TRIM_LEFT=5
chr2	48025915	48026006	MSH6_4.1.429838	.	GENE_ID=MSH6;Pool=2;PURPOSE=CDS;CNV_ID=MSH6;CNV_HS=1
chr2	48025968	48026041	MSH6_4.1.258681	.	GENE_ID=MSH6;Pool=1;PURPOSE=CDS;CNV_ID=MSH6;CNV_HS=1;TRIM_LEFT=5
chr2	48026038	48026172	MSH6_4.1.273881	.	GENE_ID=MSH6;Pool=2;PURPOSE=CDS;CNV_ID=MSH6;CNV_HS=1
chr2	48026165	48026237	MSH6_4.1.370338	.	GENE_ID=MSH6;Pool=1;PURPOSE=CDS;CNV_ID=MSH6;CNV_HS=1;TRIM_LEFT=5
chr2	48026204	48026334	MSH6_4.1.92154	.	GENE_ID=MSH6;Pool=2;PURPOSE=CDS;CNV_ID=MSH6;CNV_HS=1;TRIM_LEFT=4
chr2	48026333	48026409	MSH6_4.1.369106	.	GENE_ID=MSH6;Pool=1;PURPOSE=CDS;CNV_ID=MSH6;CNV_HS=1
chr2	48026371	48026501	MSH6_4.1.115419	.	GENE_ID=MSH6;Pool=2;PURPOSE=CDS;CNV_ID=MSH6;CNV_HS=1;TRIM_LEFT=7
chr2	48026461	48026541	MSH6_4.1.291727	.	GENE_ID=MSH6;Pool=1;PURPOSE=CDS;CNV_ID=MSH6;CNV_HS=1;TRIM_LEFT=6
chr2	48026539	48026628	MSH6_4.1.126923	.	GENE_ID=MSH6;Pool=2;PURPOSE=CDS;CNV_ID=MSH6;CNV_HS=1
chr2	48026628	48026701	MSH6_4.1.255478	.	GENE_ID=MSH6;Pool=1;PURPOSE=CDS;CNV_ID=MSH6;CNV_HS=1
chr2	48026667	48026780	MSH6_4.2.314265	.	GENE_ID=MSH6;Pool=2;PURPOSE=CDS;CNV_ID=MSH6;CNV_HS=1
chr2	48026780	48026852	MSH6_4.2.22238	.	GENE_ID=MSH6;Pool=1;PURPOSE=CDS;CNV_ID=MSH6;CNV_HS=1
chr2	48026820	48026940	MSH6_4.2.337819	.	GENE_ID=MSH6;Pool=2;PURPOSE=CDS;CNV_ID=MSH6;CNV_HS=1;TRIM_LEFT=9
chr2	48026912	48027004	MSH6_4.2.52876	.	GENE_ID=MSH6;Pool=1;PURPOSE=CDS;CNV_ID=MSH6;CNV_HS=1;TRIM_LEFT=5
chr2	48026987	48027091	MSH6_4.2.187313	.	GENE_ID=MSH6;Pool=2;PURPOSE=CDS;CNV_ID=MSH6;CNV_HS=1;TRIM_LEFT=5
chr2	48027076	48027168	MSH6_4.2.364582	.	GENE_ID=MSH6;Pool=1;PURPOSE=CDS;CNV_ID=MSH6;CNV_HS=1;TRIM_LEFT=4
chr2	48027135	48027248	MSH6_4.2.452608	.	GENE_ID=MSH6;Pool=2;PURPOSE=CDS;CNV_ID=MSH6;CNV_HS=1;TRIM_LEFT=6
chr2	48027239	48027310	MSH6_4.2.410422	.	GENE_ID=MSH6;Pool=1;PURPOSE=CDS;CNV_ID=MSH6;CNV_HS=1
chr2	48027290	48027415	MSH6_4.2.43428	.	GENE_ID=MSH6;Pool=2;PURPOSE=CDS;CNV_ID=MSH6;CNV_HS=1
chr2	48027373	48027488	MSH6_4.2.19624	.	GENE_ID=MSH6;Pool=1;PURPOSE=CDS;CNV_ID=MSH6;CNV_HS=1;TRIM_LEFT=5
chr2	48027449	48027566	MSH6_4.2.321272	.	GENE_ID=MSH6;Pool=2;PURPOSE=CDS;CNV_ID=MSH6;CNV_HS=1;TRIM_LEFT=5
chr2	48027560	48027633	MSH6_4.2.12473	.	GENE_ID=MSH6;Pool=1;PURPOSE=CDS;CNV_ID=MSH6;CNV_HS=1
chr2	48027610	48027701	MSH6_4.3.233924	.	GENE_ID=MSH6;Pool=2;PURPOSE=CDS;CNV_ID=MSH6;CNV_HS=1;TRIM_LEFT=7
chr2	48027687	48027770	MSH6_4.3.194846	.	GENE_ID=MSH6;Pool=1;PURPOSE=CDS;CNV_ID=MSH6;CNV_HS=1;TRIM_LEFT=4
chr2	48027751	48027860	MSH6_4.3.86178	.	GENE_ID=MSH6;Pool=2;PURPOSE=CDS;CNV_ID=MSH6;CNV_HS=1;TRIM_LEFT=6
chr2	48027857	48027928	MSH6_4.3.173605	.	GENE_ID=MSH6;Pool=1;PURPOSE=CDS;CNV_ID=MSH6;CNV_HS=1
chr2	48027897	48028027	MSH6_4.3.313034	.	GENE_ID=MSH6;Pool=2;PURPOSE=CDS;CNV_ID=MSH6;CNV_HS=1;TRIM_LEFT=8
chr2	48028027	48028103	MSH6_4.3.202278	.	GENE_ID=MSH6;Pool=1;PURPOSE=CDS;CNV_ID=MSH6;CNV_HS=1
chr2	48028063	48028187	MSH6_4.3.289400	.	GENE_ID=MSH6;Pool=2;PURPOSE=CDS;CNV_ID=MSH6;CNV_HS=1;TRIM_LEFT=5
chr2	48028167	48028241	MSH6_4.3.176431	.	GENE_ID=MSH6;Pool=1;PURPOSE=CDS;CNV_ID=MSH6;CNV_HS=1;TRIM_LEFT=6
chr2	48028223	48028315	MSH6_4.3.297217	.	GENE_ID=MSH6;Pool=2;PURPOSE=CDS;CNV_ID=MSH6;CNV_HS=1;TRIM_LEFT=4
chr2	48030532	48030651	MSH6_5.80313	.	GENE_ID=MSH6;Pool=1;PURPOSE=CDS;CNV_ID=MSH6;CNV_HS=1
chr2	48030629	48030712	MSH6_5.113709	.	GENE_ID=MSH6;Pool=2;PURPOSE=CDS;CNV_ID=MSH6;CNV_HS=1;TRIM_LEFT=5
chr2	48030690	48030810	MSH6_5.58405	.	GENE_ID=MSH6;Pool=1;PURPOSE=CDS;CNV_ID=MSH6;CNV_HS=1;TRIM_LEFT=9
chr2	48030799	48030887	MSH6_5.126419	.	GENE_ID=MSH6;Pool=2;PURPOSE=CDS;CNV_ID=MSH6;CNV_HS=1;TRIM_LEFT=4
chr2	48032036	48032107	MSH6_6.16019	.	GENE_ID=MSH6;Pool=1;PURPOSE=CDS;CNV_ID=MSH6;CNV_HS=1
chr2	48032059	48032176	MSH6_6.43426	.	GENE_ID=MSH6;Pool=2;PURPOSE=CDS;CNV_ID=MSH6;CNV_HS=1;TRIM_LEFT=2
chr2	48032700	48032827	MSH6_7.24296	.	GENE_ID=MSH6;Pool=1;PURPOSE=CDS;CNV_ID=MSH6;CNV_HS=1
chr2	48032825	48032940	MSH6_7.9122	.	GENE_ID=MSH6;Pool=2;PURPOSE=CDS;CNV_ID=MSH6;CNV_HS=1
chr2	48033270	48033348	MSH6_8.13198	.	GENE_ID=MSH6;Pool=1;PURPOSE=CDS;CNV_ID=MSH6;CNV_HS=1
chr2	48033346	48033479	MSH6_8.54713	.	GENE_ID=MSH6;Pool=2;PURPOSE=CDS;CNV_ID=MSH6;CNV_HS=1
chr2	48033462	48033579	MSH6_8.37405	.	GENE_ID=MSH6;Pool=1;PURPOSE=CDS;CNV_ID=MSH6;CNV_HS=1;TRIM_LEFT=7
chr2	48033585	48033700	MSH6_9.82129	.	GENE_ID=MSH6;Pool=2;PURPOSE=CDS;CNV_ID=MSH6;CNV_HS=1
chr2	48033693	48033760	MSH6_9.84082	.	GENE_ID=MSH6;Pool=1;PURPOSE=CDS;CNV_ID=MSH6;CNV_HS=1
chr2	48033739	48033840	MSH6_9.47573	.	GENE_ID=MSH6;Pool=2;PURPOSE=CDS;CNV_ID=MSH6;CNV_HS=1;TRIM_LEFT=8
chr2	48033880	48033955	MSH6_10.20930	.	GENE_ID=MSH6;Pool=1;PURPOSE=CDS;CNV_ID=MSH6;CNV_HS=1
chr2	48033933	48034005	MSH6_10.27548	.	GENE_ID=MSH6;Pool=2;PURPOSE=CDS;CNV_ID=MSH6;CNV_HS=1
chr2	61719378	61719496	SP_114.22856	.	GENE_ID=XPO1;Pool=1;PURPOSE=Hotspot;CNV_ID=XPO1;CNV_HS=0
chr2	178098710	178098824	SP_115.82201	.	GENE_ID=NFE2L2;Pool=2;PURPOSE=Hotspot;CNV_ID=NFE2L2;CNV_HS=0
chr2	178098869	178098977	SP_115.41276	.	GENE_ID=NFE2L2;Pool=1;PURPOSE=Hotspot;CNV_ID=NFE2L2;CNV_HS=0
chr2	198266596	198266720	SP_116.66271	.	GENE_ID=SF3B1;Pool=2;PURPOSE=Hotspot;CNV_ID=SF3B1;CNV_HS=0
chr2	198266786	198266899	SP_116.120672	.	GENE_ID=SF3B1;Pool=1;PURPOSE=Hotspot;CNV_ID=SF3B1;CNV_HS=0
chr2	198267321	198267394	SP_116.303298	.	GENE_ID=SF3B1;Pool=2;PURPOSE=Hotspot;CNV_ID=SF3B1;CNV_HS=0
chr2	198267438	198267556	SP_116.350767	.	GENE_ID=SF3B1;Pool=1;PURPOSE=Hotspot;CNV_ID=SF3B1;CNV_HS=0
chr2	209113083	209113207	SP_117.4911	.	GENE_ID=IDH1;Pool=2;PURPOSE=Hotspot;CNV_ID=IDH1;CNV_HS=0
chr2	212248560	212248686	SP_118.12032	.	GENE_ID=ERBB4;Pool=1;PURPOSE=Hotspot;CNV_ID=ERBB4;CNV_HS=0
chr2	212426648	212426772	SP_119.26808	.	GENE_ID=ERBB4;Pool=2;PURPOSE=Hotspot;CNV_ID=ERBB4;CNV_HS=0
chr2	212488673	212488800	SP_120.11146	.	GENE_ID=ERBB4;Pool=1;PURPOSE=Hotspot;CNV_ID=ERBB4;CNV_HS=0
chr2	212495254	212495373	SP_121.13230	.	GENE_ID=ERBB4;Pool=2;PURPOSE=Hotspot;CNV_ID=ERBB4;CNV_HS=0
chr2	212566748	212566872	SP_122.12756	.	GENE_ID=ERBB4;Pool=1;PURPOSE=Hotspot;CNV_ID=ERBB4;CNV_HS=0
chr3	10070318	10070425	FANCD2_1.94296	.	GENE_ID=FANCD2;Pool=2;PURPOSE=CDS;CNV_ID=FANCD2;CNV_HS=1
chr3	10074480	10074567	FANCD2_2.63572	.	GENE_ID=FANCD2;Pool=1;PURPOSE=CDS;CNV_ID=FANCD2;CNV_HS=1
chr3	10074565	10074680	FANCD2_2.62201	.	GENE_ID=FANCD2;Pool=2;PURPOSE=CDS;CNV_ID=FANCD2;CNV_HS=1
chr3	10076102	10076198	FANCD2_3.15007	.	GENE_ID=FANCD2;Pool=1;PURPOSE=CDS;CNV_ID=FANCD2;CNV_HS=1
chr3	10076165	10076238	FANCD2_3.55306	.	GENE_ID=FANCD2;Pool=2;PURPOSE=CDS;CNV_ID=FANCD2;CNV_HS=1;TRIM_LEFT=7
chr3	10076306	10076415	FANCD2_4.12592	.	GENE_ID=FANCD2;Pool=1;PURPOSE=CDS;CNV_ID=FANCD2;CNV_HS=1
chr3	10076401	10076491	FANCD2_4.64959	.	GENE_ID=FANCD2;Pool=2;PURPOSE=CDS;CNV_ID=FANCD2;CNV_HS=1;TRIM_LEFT=6
chr3	10076833	10076932	FANCD2_5.22077	.	GENE_ID=FANCD2;Pool=1;PURPOSE=CDS;CNV_ID=FANCD2;CNV_HS=1
chr3	10077951	10078039	FANCD2_6.33684	.	GENE_ID=FANCD2;Pool=2;PURPOSE=CDS;CNV_ID=FANCD2;CNV_HS=1
chr3	10080955	10081075	FANCD2_7.34238	.	GENE_ID=FANCD2;Pool=1;PURPOSE=CDS;CNV_ID=FANCD2;CNV_HS=1
chr3	10081355	10081430	FANCD2_8.91189	.	GENE_ID=FANCD2;Pool=2;PURPOSE=CDS;CNV_ID=FANCD2;CNV_HS=1
chr3	10081409	10081545	FANCD2_8.76345	.	GENE_ID=FANCD2;Pool=1;PURPOSE=CDS;CNV_ID=FANCD2;CNV_HS=1;TRIM_LEFT=9
chr3	10083283	10083397	FANCD2_9.28064	.	GENE_ID=FANCD2;Pool=2;PURPOSE=CDS;CNV_ID=FANCD2;CNV_HS=1
chr3	10083348	10083443	FANCD2_9.21191	.	GENE_ID=FANCD2;Pool=1;PURPOSE=CDS;CNV_ID=FANCD2;CNV_HS=1;TRIM_LEFT=3
chr3	10084198	10084270	FANCD2_10.19960	.	GENE_ID=FANCD2;Pool=2;PURPOSE=CDS;CNV_ID=FANCD2;CNV_HS=1
chr3	10084250	10084359	FANCD2_10.78571	.	GENE_ID=FANCD2;Pool=1;PURPOSE=CDS;CNV_ID=FANCD2;CNV_HS=1;TRIM_LEFT=6
chr3	10084706	10084840	FANCD2_11.28856	.	GENE_ID=FANCD2;Pool=2;PURPOSE=CDS;CNV_ID=FANCD2;CNV_HS=1
chr3	10085115	10085192	FANCD2_12.76416	.	GENE_ID=FANCD2;Pool=1;PURPOSE=CDS;CNV_ID=FANCD2;CNV_HS=1
chr3	10085171	10085281	FANCD2_12.121204	.	GENE_ID=FANCD2;Pool=2;PURPOSE=CDS;CNV_ID=FANCD2;CNV_HS=1;TRIM_LEFT=6
chr3	10085488	10085564	FANCD2_13.33794	.	GENE_ID=FANCD2;Pool=1;PURPOSE=CDS;CNV_ID=FANCD2;CNV_HS=1
chr3	10088219	10088356	FANCD2_14.95885	.	GENE_ID=FANCD2;Pool=2;PURPOSE=CDS;CNV_ID=FANCD2;CNV_HS=1;TRIM_LEFT=200
chr3	10088398	10088527	FANCD2_14.95434	.	GENE_ID=FANCD2;Pool=1;PURPOSE=CDS;CNV_ID=FANCD2;CNV_HS=1
chr3	10089531	10089645	FANCD2_15.76363	.	GENE_ID=FANCD2;Pool=2;PURPOSE=CDS;CNV_ID=FANCD2;CNV_HS=1
chr3	10089617	10089739	FANCD2_15.44801	.	GENE_ID=FANCD2;Pool=1;PURPOSE=CDS;CNV_ID=FANCD2;CNV_HS=1;TRIM_LEFT=3
chr3	10089708	10089792	FANCD2_15.115210	.	GENE_ID=FANCD2;Pool=2;PURPOSE=CDS;CNV_ID=FANCD2;CNV_HS=1;TRIM_LEFT=10
chr3	10091048	10091177	FANCD2_16.111268	.	GENE_ID=FANCD2;Pool=1;PURPOSE=CDS;CNV_ID=FANCD2;CNV_HS=1
chr3	10091078	10091196	FANCD2_16.46891	.	GENE_ID=FANCD2;Pool=2;PURPOSE=CDS;CNV_ID=FANCD2;CNV_HS=1;TRIM_LEFT=5
chr3	10094054	10094179	FANCD2_17.45069	.	GENE_ID=FANCD2;Pool=1;PURPOSE=CDS;CNV_ID=FANCD2;CNV_HS=1
chr3	10094152	10094230	FANCD2_17.43595	.	GENE_ID=FANCD2;Pool=2;PURPOSE=CDS;CNV_ID=FANCD2;CNV_HS=1;TRIM_LEFT=3
chr3	10101920	10102018	FANCD2_18.26187	.	GENE_ID=FANCD2;Pool=1;PURPOSE=CDS;CNV_ID=FANCD2;CNV_HS=1
chr3	10101973	10102093	FANCD2_18.21046	.	GENE_ID=FANCD2;Pool=2;PURPOSE=CDS;CNV_ID=FANCD2;CNV_HS=1;TRIM_LEFT=6
chr3	10105397	10105484	FANCD2_20.63138	.	GENE_ID=FANCD2;Pool=1;PURPOSE=CDS;CNV_ID=FANCD2;CNV_HS=1
chr3	10105484	10105612	FANCD2_20.127767	.	GENE_ID=FANCD2;Pool=2;PURPOSE=CDS;CNV_ID=FANCD2;CNV_HS=1
chr3	10106024	10106150	FANCD2_21.62366	.	GENE_ID=FANCD2;Pool=1;PURPOSE=CDS;CNV_ID=FANCD2;CNV_HS=1
chr3	10106380	10106461	FANCD2_22.91210	.	GENE_ID=FANCD2;Pool=2;PURPOSE=CDS;CNV_ID=FANCD2;CNV_HS=1
chr3	10106413	10106543	FANCD2_22.15459	.	GENE_ID=FANCD2;Pool=1;PURPOSE=CDS;CNV_ID=FANCD2;CNV_HS=1;TRIM_LEFT=7
chr3	10106526	10106609	FANCD2_22.112149	.	GENE_ID=FANCD2;Pool=2;PURPOSE=CDS;CNV_ID=FANCD2;CNV_HS=1;TRIM_LEFT=4
chr3	10107069	10107183	FANCD2_23.38991	.	GENE_ID=FANCD2;Pool=1;PURPOSE=CDS;CNV_ID=FANCD2;CNV_HS=1
chr3	10107519	10107649	FANCD2_24.35252	.	GENE_ID=FANCD2;Pool=2;PURPOSE=CDS;CNV_ID=FANCD2;CNV_HS=1
chr3	10107644	10107733	FANCD2_24.38890	.	GENE_ID=FANCD2;Pool=1;PURPOSE=CDS;CNV_ID=FANCD2;CNV_HS=1
chr3	10108835	10108948	FANCD2_25.21912	.	GENE_ID=FANCD2;Pool=2;PURPOSE=CDS;CNV_ID=FANCD2;CNV_HS=1
chr3	10108896	10109006	FANCD2_25.82131	.	GENE_ID=FANCD2;Pool=1;PURPOSE=CDS;CNV_ID=FANCD2;CNV_HS=1;TRIM_LEFT=5
chr3	10114546	10114683	FANCD2_26.72314	.	GENE_ID=FANCD2;Pool=2;PURPOSE=CDS;CNV_ID=FANCD2;CNV_HS=1
chr3	10114893	10115043	FANCD2_27.15662	.	GENE_ID=FANCD2;Pool=1;PURPOSE=CDS;CNV_ID=FANCD2;CNV_HS=1
chr3	10116208	10116279	FANCD2_28.73676	.	GENE_ID=FANCD2;Pool=2;PURPOSE=CDS;CNV_ID=FANCD2;CNV_HS=1
chr3	10116219	10116348	FANCD2_28.39513	.	GENE_ID=FANCD2;Pool=1;PURPOSE=CDS;CNV_ID=FANCD2;CNV_HS=1;TRIM_LEFT=14
chr3	10116342	10116435	FANCD2_28.10691	.	GENE_ID=FANCD2;Pool=2;PURPOSE=CDS;CNV_ID=FANCD2;CNV_HS=1
chr3	10119759	10119887	FANCD2_29.103157	.	GENE_ID=FANCD2;Pool=1;PURPOSE=CDS;CNV_ID=FANCD2;CNV_HS=1
chr3	10122776	10122898	FANCD2_30.44568	.	GENE_ID=FANCD2;Pool=2;PURPOSE=CDS;CNV_ID=FANCD2;CNV_HS=1
chr3	10122860	10122931	FANCD2_30.52558	.	GENE_ID=FANCD2;Pool=1;PURPOSE=CDS;CNV_ID=FANCD2;CNV_HS=1;TRIM_LEFT=8
chr3	10123021	10123139	FANCD2_31.98449	.	GENE_ID=FANCD2;Pool=2;PURPOSE=CDS;CNV_ID=FANCD2;CNV_HS=1
chr3	10123115	10123188	FANCD2_31.48115	.	GENE_ID=FANCD2;Pool=1;PURPOSE=CDS;CNV_ID=FANCD2;CNV_HS=1;TRIM_LEFT=9
chr3	10127489	10127608	FANCD2_32.5175	.	GENE_ID=FANCD2;Pool=2;PURPOSE=CDS;CNV_ID=FANCD2;CNV_HS=1
chr3	10127555	10127631	FANCD2_32.86913	.	GENE_ID=FANCD2;Pool=1;PURPOSE=CDS;CNV_ID=FANCD2;CNV_HS=1;TRIM_LEFT=6
chr3	10128790	10128860	FANCD2_33.28828	.	GENE_ID=FANCD2;Pool=2;PURPOSE=CDS;CNV_ID=FANCD2;CNV_HS=1
chr3	10128818	10128940	FANCD2_33.116919	.	GENE_ID=FANCD2;Pool=1;PURPOSE=CDS;CNV_ID=FANCD2;CNV_HS=1;TRIM_LEFT=6
chr3	10128927	10128997	FANCD2_33.84279	.	GENE_ID=FANCD2;Pool=2;PURPOSE=CDS;CNV_ID=FANCD2;CNV_HS=1
chr3	10130114	10130219	FANCD2_34.67364	.	GENE_ID=FANCD2;Pool=1;PURPOSE=CDS;CNV_ID=FANCD2;CNV_HS=1
chr3	10130215	10130289	FANCD2_34.30575	.	GENE_ID=FANCD2;Pool=2;PURPOSE=CDS;CNV_ID=FANCD2;CNV_HS=1
chr3	10130458	10130535	FANCD2_35.100029	.	GENE_ID=FANCD2;Pool=1;PURPOSE=CDS;CNV_ID=FANCD2;CNV_HS=1
chr3	10130521	10130641	FANCD2_35.110145	.	GENE_ID=FANCD2;Pool=2;PURPOSE=CDS;CNV_ID=FANCD2;CNV_HS=1;TRIM_LEFT=8
chr3	10131935	10132009	FANCD2_36.99171	.	GENE_ID=FANCD2;Pool=1;PURPOSE=CDS;CNV_ID=FANCD2;CNV_HS=1
chr3	10131981	10132085	FANCD2_36.60439	.	GENE_ID=FANCD2;Pool=2;PURPOSE=CDS;CNV_ID=FANCD2;CNV_HS=1;TRIM_LEFT=10
chr3	10133835	10133951	FANCD2_37.42577	.	GENE_ID=FANCD2;Pool=1;PURPOSE=CDS;CNV_ID=FANCD2;CNV_HS=1
chr3	10134959	10135040	FANCD2_38.30426	.	GENE_ID=FANCD2;Pool=2;PURPOSE=CDS;CNV_ID=FANCD2;CNV_HS=1
chr3	10135959	10136074	FANCD2_39.24484	.	GENE_ID=FANCD2;Pool=1;PURPOSE=CDS;CNV_ID=FANCD2;CNV_HS=1
chr3	10136815	10136904	FANCD2_40.92809	.	GENE_ID=FANCD2;Pool=2;PURPOSE=CDS;CNV_ID=FANCD2;CNV_HS=1
chr3	10136898	10136994	FANCD2_40.10870	.	GENE_ID=FANCD2;Pool=1;PURPOSE=CDS;CNV_ID=FANCD2;CNV_HS=1;TRIM_LEFT=3
chr3	10137989	10138071	FANCD2_41.79600	.	GENE_ID=FANCD2;Pool=2;PURPOSE=CDS;CNV_ID=FANCD2;CNV_HS=1
chr3	10138025	10138154	FANCD2_41.46215	.	GENE_ID=FANCD2;Pool=1;PURPOSE=CDS;CNV_ID=FANCD2;CNV_HS=1;TRIM_LEFT=3
chr3	10138114	10138192	FANCD2_41.82922	.	GENE_ID=FANCD2;Pool=2;PURPOSE=CDS;CNV_ID=FANCD2;CNV_HS=1;TRIM_LEFT=5
chr3	10140395	10140500	FANCD2_42.153588	.	GENE_ID=FANCD2;Pool=1;PURPOSE=CDS;CNV_ID=FANCD2;CNV_HS=1
chr3	10140436	10140550	FANCD2_42.27028	.	GENE_ID=FANCD2;Pool=2;PURPOSE=CDS;CNV_ID=FANCD2;CNV_HS=1;TRIM_LEFT=7
chr3	10140550	10140639	FANCD2_42.127718	.	GENE_ID=FANCD2;Pool=1;PURPOSE=CDS;CNV_ID=FANCD2;CNV_HS=1
chr3	10142851	10142949	FANCD2_43.18440	.	GENE_ID=FANCD2;Pool=2;PURPOSE=CDS;CNV_ID=FANCD2;CNV_HS=1
chr3	10142929	10142999	FANCD2_43.26124	.	GENE_ID=FANCD2;Pool=1;PURPOSE=CDS;CNV_ID=FANCD2;CNV_HS=1;TRIM_LEFT=8
chr3	12393076	12393188	PPARG_1.3141	.	GENE_ID=PPARG;Pool=2;PURPOSE=CNV;CNV_ID=PPARG;CNV_HS=1
chr3	12421279	12421354	PPARG_2.89326	.	GENE_ID=PPARG;Pool=1;PURPOSE=CNV;CNV_ID=PPARG;CNV_HS=1
chr3	12422788	12422911	PPARG_3.123001	.	GENE_ID=PPARG;Pool=2;PURPOSE=CNV;CNV_ID=PPARG;CNV_HS=1
chr3	12422965	12423084	PPARG_3.60205	.	GENE_ID=PPARG;Pool=1;PURPOSE=CNV;CNV_ID=PPARG;CNV_HS=1
chr3	12434137	12434231	PPARG_4.89338	.	GENE_ID=PPARG;Pool=2;PURPOSE=CNV;CNV_ID=PPARG;CNV_HS=1
chr3	12447345	12447444	PPARG_5.27045	.	GENE_ID=PPARG;Pool=1;PURPOSE=CNV;CNV_ID=PPARG;CNV_HS=1
chr3	12447531	12447647	PPARG_5.43240	.	GENE_ID=PPARG;Pool=2;PURPOSE=CNV;CNV_ID=PPARG;CNV_HS=1
chr3	12458229	12458346	PPARG_6.166403	.	GENE_ID=PPARG;Pool=1;PURPOSE=CNV;CNV_ID=PPARG;CNV_HS=1
chr3	12458432	12458553	PPARG_6.27803	.	GENE_ID=PPARG;Pool=2;PURPOSE=CNV;CNV_ID=PPARG;CNV_HS=1
chr3	12475387	12475508	PPARG_7.63568	.	GENE_ID=PPARG;Pool=1;PURPOSE=CNV;CNV_ID=PPARG;CNV_HS=1
chr3	12632341	12632448	SP_131.28973	.	GENE_ID=RAF1;Pool=2;PURPOSE=Hotspot;CNV_ID=RAF1;CNV_HS=0
chr3	12645642	12645765	SP_132.18133	.	GENE_ID=RAF1;Pool=1;PURPOSE=Hotspot;CNV_ID=RAF1;CNV_HS=0
chr3	37035027	37035144	MLH1_1.22506	.	GENE_ID=MLH1;Pool=2;PURPOSE=CDS;CNV_ID=MLH1;CNV_HS=1
chr3	37035048	37035177	MLH1_1.58342	.	GENE_ID=MLH1;Pool=1;PURPOSE=CDS;CNV_ID=MLH1;CNV_HS=1;TRIM_LEFT=4
chr3	37038050	37038134	MLH1_2.26093	.	GENE_ID=MLH1;Pool=2;PURPOSE=CDS;CNV_ID=MLH1;CNV_HS=1
chr3	37038118	37038205	MLH1_2.85934	.	GENE_ID=MLH1;Pool=1;PURPOSE=CDS;CNV_ID=MLH1;CNV_HS=1;TRIM_LEFT=5
chr3	37042408	37042514	MLH1_3.39606	.	GENE_ID=MLH1;Pool=2;PURPOSE=CDS;CNV_ID=MLH1;CNV_HS=1
chr3	37042503	37042573	MLH1_3.57787	.	GENE_ID=MLH1;Pool=1;PURPOSE=CDS;CNV_ID=MLH1;CNV_HS=1;TRIM_LEFT=4
chr3	37045831	37045905	MLH1_4.69999	.	GENE_ID=MLH1;Pool=2;PURPOSE=CDS;CNV_ID=MLH1;CNV_HS=1
chr3	37045895	37046015	MLH1_4.76142	.	GENE_ID=MLH1;Pool=1;PURPOSE=CDS;CNV_ID=MLH1;CNV_HS=1;TRIM_LEFT=6
chr3	37048436	37048552	MLH1_5.24738	.	GENE_ID=MLH1;Pool=2;PURPOSE=CDS;CNV_ID=MLH1;CNV_HS=1
chr3	37048537	37048653	MLH1_5.33478	.	GENE_ID=MLH1;Pool=1;PURPOSE=CDS;CNV_ID=MLH1;CNV_HS=1;TRIM_LEFT=6
chr3	37050238	37050325	MLH1_6.81677	.	GENE_ID=MLH1;Pool=2;PURPOSE=CDS;CNV_ID=MLH1;CNV_HS=1
chr3	37050309	37050417	MLH1_6.16243	.	GENE_ID=MLH1;Pool=1;PURPOSE=CDS;CNV_ID=MLH1;CNV_HS=1;TRIM_LEFT=6
chr3	37053301	37053368	MLH1_7.35818	.	GENE_ID=MLH1;Pool=2;PURPOSE=CDS;CNV_ID=MLH1;CNV_HS=1
chr3	37053480	37053580	MLH1_8.8453	.	GENE_ID=MLH1;Pool=1;PURPOSE=CDS;CNV_ID=MLH1;CNV_HS=1
chr3	37053547	37053647	MLH1_8.66035	.	GENE_ID=MLH1;Pool=2;PURPOSE=CDS;CNV_ID=MLH1;CNV_HS=1;TRIM_LEFT=3
chr3	37055848	37055951	MLH1_9.81700	.	GENE_ID=MLH1;Pool=1;PURPOSE=CDS;CNV_ID=MLH1;CNV_HS=1
chr3	37055948	37056039	MLH1_9.21225	.	GENE_ID=MLH1;Pool=2;PURPOSE=CDS;CNV_ID=MLH1;CNV_HS=1
chr3	37056006	37056080	MLH1_9.15126	.	GENE_ID=MLH1;Pool=1;PURPOSE=CDS;CNV_ID=MLH1;CNV_HS=1;TRIM_LEFT=5
chr3	37058986	37059102	MLH1_10.62753	.	GENE_ID=MLH1;Pool=2;PURPOSE=CDS;CNV_ID=MLH1;CNV_HS=1
chr3	37061754	37061844	MLH1_11.19219	.	GENE_ID=MLH1;Pool=1;PURPOSE=CDS;CNV_ID=MLH1;CNV_HS=1
chr3	37061833	37061961	MLH1_11.33163	.	GENE_ID=MLH1;Pool=2;PURPOSE=CDS;CNV_ID=MLH1;CNV_HS=1;TRIM_LEFT=5
chr3	37067067	37067175	MLH1_1.11206	.	GENE_ID=MLH1;Pool=1;PURPOSE=CDS;CNV_ID=MLH1;CNV_HS=1
chr3	37067146	37067222	MLH1_12.5328	.	GENE_ID=MLH1;Pool=2;PURPOSE=CDS;CNV_ID=MLH1;CNV_HS=1;TRIM_LEFT=5
chr3	37067208	37067348	MLH1_12.122073	.	GENE_ID=MLH1;Pool=1;PURPOSE=CDS;CNV_ID=MLH1;CNV_HS=1;TRIM_LEFT=7
chr3	37067345	37067436	MLH1_12.47638	.	GENE_ID=MLH1;Pool=2;PURPOSE=CDS;CNV_ID=MLH1;CNV_HS=1
chr3	37067377	37067503	MLH1_12.88749	.	GENE_ID=MLH1;Pool=1;PURPOSE=CDS;CNV_ID=MLH1;CNV_HS=1;TRIM_LEFT=4
chr3	37070217	37070291	MLH1_13.54065	.	GENE_ID=MLH1;Pool=2;PURPOSE=CDS;CNV_ID=MLH1;CNV_HS=1
chr3	37070287	37070413	MLH1_13.62831	.	GENE_ID=MLH1;Pool=1;PURPOSE=CDS;CNV_ID=MLH1;CNV_HS=1
chr3	37070413	37070486	MLH1_13.27560	.	GENE_ID=MLH1;Pool=2;PURPOSE=CDS;CNV_ID=MLH1;CNV_HS=1
chr3	37081651	37081738	MLH1_14.65935	.	GENE_ID=MLH1;Pool=1;PURPOSE=CDS;CNV_ID=MLH1;CNV_HS=1
chr3	37081689	37081796	MLH1_14.77502	.	GENE_ID=MLH1;Pool=2;PURPOSE=CDS;CNV_ID=MLH1;CNV_HS=1;TRIM_LEFT=4
chr3	37083739	37083856	MLH1_15.9442	.	GENE_ID=MLH1;Pool=1;PURPOSE=CDS;CNV_ID=MLH1;CNV_HS=1
chr3	37088983	37089083	MLH1_16.87413	.	GENE_ID=MLH1;Pool=2;PURPOSE=CDS;CNV_ID=MLH1;CNV_HS=1
chr3	37089057	37089179	MLH1_16.37834	.	GENE_ID=MLH1;Pool=1;PURPOSE=CDS;CNV_ID=MLH1;CNV_HS=1;TRIM_LEFT=6
chr3	37089993	37090114	MLH1_17.14805	.	GENE_ID=MLH1;Pool=2;PURPOSE=CDS;CNV_ID=MLH1;CNV_HS=1
chr3	37090349	37090421	MLH1_18.114253	.	GENE_ID=MLH1;Pool=1;PURPOSE=CDS;CNV_ID=MLH1;CNV_HS=1
chr3	37090414	37090538	MLH1_18.49944	.	GENE_ID=MLH1;Pool=2;PURPOSE=CDS;CNV_ID=MLH1;CNV_HS=1;TRIM_LEFT=5
chr3	37091971	37092085	MLH1_19.119950	.	GENE_ID=MLH1;Pool=1;PURPOSE=CDS;CNV_ID=MLH1;CNV_HS=1
chr3	37092074	37092147	MLH1_19.79609	.	GENE_ID=MLH1;Pool=2;PURPOSE=CDS;CNV_ID=MLH1;CNV_HS=1
chr3	37092128	37092244	MLH1_19.107619	.	GENE_ID=MLH1;Pool=1;PURPOSE=CDS;CNV_ID=MLH1;CNV_HS=1;TRIM_LEFT=5
chr3	38181918	38182037	SP_133.35672	.	GENE_ID=MYD88;Pool=2;PURPOSE=Hotspot;CNV_ID=MYD88;CNV_HS=0
chr3	38182550	38182653	SP_134.7462	.	GENE_ID=MYD88;Pool=1;PURPOSE=Hotspot;CNV_ID=MYD88;CNV_HS=0
chr3	41266008	41266088	SP_135.58895	.	GENE_ID=CTNNB1;Pool=2;PURPOSE=Hotspot;CNV_ID=CTNNB1;CNV_HS=0
chr3	41266076	41266202	SP_135.23532	.	GENE_ID=CTNNB1;Pool=1;PURPOSE=Hotspot;CNV_ID=CTNNB1;CNV_HS=0;TRIM_LEFT=8
chr3	41268741	41268864	SP_136.23899	.	GENE_ID=CTNNB1;Pool=2;PURPOSE=Hotspot;CNV_ID=CTNNB1;CNV_HS=0
chr3	47058548	47058621	SETD2_1.26544	.	GENE_ID=SETD2;Pool=1;PURPOSE=CDS;CNV_ID=SETD2;CNV_HS=1
chr3	47058596	47058724	SETD2_1.81724	.	GENE_ID=SETD2;Pool=2;PURPOSE=CDS;CNV_ID=SETD2;CNV_HS=1;TRIM_LEFT=9
chr3	47058717	47058790	SETD2_1.90269	.	GENE_ID=SETD2;Pool=1;PURPOSE=CDS;CNV_ID=SETD2;CNV_HS=1;TRIM_LEFT=5
chr3	47059084	47059208	SETD2_2.71055	.	GENE_ID=SETD2;Pool=2;PURPOSE=CDS;CNV_ID=SETD2;CNV_HS=1
chr3	47059198	47059275	SETD2_2.97753	.	GENE_ID=SETD2;Pool=1;PURPOSE=CDS;CNV_ID=SETD2;CNV_HS=1;TRIM_LEFT=5
chr3	47061236	47061360	SETD2_3.50130	.	GENE_ID=SETD2;Pool=2;PURPOSE=CDS;CNV_ID=SETD2;CNV_HS=1
chr3	47079147	47079267	SETD2_4.3976	.	GENE_ID=SETD2;Pool=1;PURPOSE=CDS;CNV_ID=SETD2;CNV_HS=1
chr3	47079190	47079293	SETD2_4.79848	.	GENE_ID=SETD2;Pool=2;PURPOSE=CDS;CNV_ID=SETD2;CNV_HS=1;TRIM_LEFT=6
chr3	47083997	47084069	SETD2_5.71234	.	GENE_ID=SETD2;Pool=1;PURPOSE=CDS;CNV_ID=SETD2;CNV_HS=1
chr3	47084058	47084180	SETD2_5.52082	.	GENE_ID=SETD2;Pool=2;PURPOSE=CDS;CNV_ID=SETD2;CNV_HS=1;TRIM_LEFT=5
chr3	47084133	47084205	SETD2_5.124483	.	GENE_ID=SETD2;Pool=1;PURPOSE=CDS;CNV_ID=SETD2;CNV_HS=1;TRIM_LEFT=12
chr3	47087969	47088083	SETD2_6.14392	.	GENE_ID=SETD2;Pool=2;PURPOSE=CDS;CNV_ID=SETD2;CNV_HS=1
chr3	47088074	47088159	SETD2_6.55192	.	GENE_ID=SETD2;Pool=1;PURPOSE=CDS;CNV_ID=SETD2;CNV_HS=1;TRIM_LEFT=6
chr3	47098281	47098389	SETD2_7.39537	.	GENE_ID=SETD2;Pool=2;PURPOSE=CDS;CNV_ID=SETD2;CNV_HS=1
chr3	47098377	47098451	SETD2_7.35272	.	GENE_ID=SETD2;Pool=1;PURPOSE=CDS;CNV_ID=SETD2;CNV_HS=1;TRIM_LEFT=5
chr3	47098423	47098538	SETD2_7.45187	.	GENE_ID=SETD2;Pool=2;PURPOSE=CDS;CNV_ID=SETD2;CNV_HS=1;TRIM_LEFT=5
chr3	47098534	47098619	SETD2_7.38443	.	GENE_ID=SETD2;Pool=1;PURPOSE=CDS;CNV_ID=SETD2;CNV_HS=1
chr3	47098578	47098710	SETD2_7.156156	.	GENE_ID=SETD2;Pool=2;PURPOSE=CDS;CNV_ID=SETD2;CNV_HS=1;TRIM_LEFT=3
chr3	47098675	47098781	SETD2_7.204561	.	GENE_ID=SETD2;Pool=1;PURPOSE=CDS;CNV_ID=SETD2;CNV_HS=1;TRIM_LEFT=9
chr3	47098744	47098877	SETD2_7.114905	.	GENE_ID=SETD2;Pool=2;PURPOSE=CDS;CNV_ID=SETD2;CNV_HS=1;TRIM_LEFT=3
chr3	47098828	47098910	SETD2_7.256480	.	GENE_ID=SETD2;Pool=1;PURPOSE=CDS;CNV_ID=SETD2;CNV_HS=1;TRIM_LEFT=4
chr3	47098910	47098987	SETD2_7.138434	.	GENE_ID=SETD2;Pool=2;PURPOSE=CDS;CNV_ID=SETD2;CNV_HS=1
chr3	47103613	47103699	SETD2_8.46306	.	GENE_ID=SETD2;Pool=1;PURPOSE=CDS;CNV_ID=SETD2;CNV_HS=1
chr3	47103653	47103773	SETD2_8.10992	.	GENE_ID=SETD2;Pool=2;PURPOSE=CDS;CNV_ID=SETD2;CNV_HS=1
chr3	47103758	47103835	SETD2_8.71412	.	GENE_ID=SETD2;Pool=1;PURPOSE=CDS;CNV_ID=SETD2;CNV_HS=1;TRIM_LEFT=8
chr3	47103805	47103886	SETD2_8.58597	.	GENE_ID=SETD2;Pool=2;PURPOSE=CDS;CNV_ID=SETD2;CNV_HS=1;TRIM_LEFT=6
chr3	47108511	47108620	SETD2_9.72052	.	GENE_ID=SETD2;Pool=1;PURPOSE=CDS;CNV_ID=SETD2;CNV_HS=1
chr3	47125204	47125321	SETD2_10.330691	.	GENE_ID=SETD2;Pool=2;PURPOSE=CDS;CNV_ID=SETD2;CNV_HS=1
chr3	47125283	47125386	SETD2_10.58998	.	GENE_ID=SETD2;Pool=1;PURPOSE=CDS;CNV_ID=SETD2;CNV_HS=1;TRIM_LEFT=3
chr3	47125370	47125489	SETD2_10.287407	.	GENE_ID=SETD2;Pool=2;PURPOSE=CDS;CNV_ID=SETD2;CNV_HS=1;TRIM_LEFT=5
chr3	47125464	47125537	SETD2_10.123459	.	GENE_ID=SETD2;Pool=1;PURPOSE=CDS;CNV_ID=SETD2;CNV_HS=1;TRIM_LEFT=3
chr3	47125528	47125672	SETD2_10.340296	.	GENE_ID=SETD2;Pool=2;PURPOSE=CDS;CNV_ID=SETD2;CNV_HS=1;TRIM_LEFT=5
chr3	47125665	47125739	SETD2_10.69491	.	GENE_ID=SETD2;Pool=1;PURPOSE=CDS;CNV_ID=SETD2;CNV_HS=1
chr3	47125703	47125844	SETD2_10.213753	.	GENE_ID=SETD2;Pool=2;PURPOSE=CDS;CNV_ID=SETD2;CNV_HS=1;TRIM_LEFT=10
chr3	47127654	47127731	SETD2_11.30338	.	GENE_ID=SETD2;Pool=1;PURPOSE=CDS;CNV_ID=SETD2;CNV_HS=1
chr3	47127681	47127788	SETD2_11.17701	.	GENE_ID=SETD2;Pool=2;PURPOSE=CDS;CNV_ID=SETD2;CNV_HS=1;TRIM_LEFT=8
chr3	47127781	47127857	SETD2_11.38871	.	GENE_ID=SETD2;Pool=1;PURPOSE=CDS;CNV_ID=SETD2;CNV_HS=1
chr3	47129570	47129650	SETD2_12.71192	.	GENE_ID=SETD2;Pool=2;PURPOSE=CDS;CNV_ID=SETD2;CNV_HS=1
chr3	47129642	47129717	SETD2_12.51187	.	GENE_ID=SETD2;Pool=1;PURPOSE=CDS;CNV_ID=SETD2;CNV_HS=1;TRIM_LEFT=5
chr3	47129684	47129792	SETD2_12.55933	.	GENE_ID=SETD2;Pool=2;PURPOSE=CDS;CNV_ID=SETD2;CNV_HS=1;TRIM_LEFT=3
chr3	47139376	47139459	SETD2_13.73340	.	GENE_ID=SETD2;Pool=1;PURPOSE=CDS;CNV_ID=SETD2;CNV_HS=1
chr3	47139459	47139572	SETD2_13.5007	.	GENE_ID=SETD2;Pool=2;PURPOSE=CDS;CNV_ID=SETD2;CNV_HS=1
chr3	47139516	47139603	SETD2_13.89002	.	GENE_ID=SETD2;Pool=1;PURPOSE=CDS;CNV_ID=SETD2;CNV_HS=1;TRIM_LEFT=5
chr3	47142941	47143042	SETD2_14.12939	.	GENE_ID=SETD2;Pool=2;PURPOSE=CDS;CNV_ID=SETD2;CNV_HS=1
chr3	47143012	47143133	SETD2_14.43131	.	GENE_ID=SETD2;Pool=1;PURPOSE=CDS;CNV_ID=SETD2;CNV_HS=1;TRIM_LEFT=12
chr3	47144811	47144883	SETD2_15.11537	.	GENE_ID=SETD2;Pool=2;PURPOSE=CDS;CNV_ID=SETD2;CNV_HS=1
chr3	47144833	47144950	SETD2_15.31818	.	GENE_ID=SETD2;Pool=1;PURPOSE=CDS;CNV_ID=SETD2;CNV_HS=1;TRIM_LEFT=8
chr3	47147481	47147589	SETD2_16.83783	.	GENE_ID=SETD2;Pool=2;PURPOSE=CDS;CNV_ID=SETD2;CNV_HS=1
chr3	47147587	47147657	SETD2_16.15244	.	GENE_ID=SETD2;Pool=1;PURPOSE=CDS;CNV_ID=SETD2;CNV_HS=1
chr3	47155269	47155393	SETD2_17.20362	.	GENE_ID=SETD2;Pool=2;PURPOSE=CDS;CNV_ID=SETD2;CNV_HS=1
chr3	47155380	47155500	SETD2_17.1558	.	GENE_ID=SETD2;Pool=1;PURPOSE=CDS;CNV_ID=SETD2;CNV_HS=1;TRIM_LEFT=2
chr3	47158092	47158176	SETD2_18.20154	.	GENE_ID=SETD2;Pool=2;PURPOSE=CDS;CNV_ID=SETD2;CNV_HS=1
chr3	47158108	47158222	SETD2_18.49094	.	GENE_ID=SETD2;Pool=1;PURPOSE=CDS;CNV_ID=SETD2;CNV_HS=1;TRIM_LEFT=6
chr3	47158222	47158316	SETD2_18.18040	.	GENE_ID=SETD2;Pool=2;PURPOSE=CDS;CNV_ID=SETD2;CNV_HS=1
chr3	47161620	47161720	SETD2_19.1.25566	.	GENE_ID=SETD2;Pool=1;PURPOSE=CDS;CNV_ID=SETD2;CNV_HS=1
chr3	47161679	47161758	SETD2_19.1.268723	.	GENE_ID=SETD2;Pool=2;PURPOSE=CDS;CNV_ID=SETD2;CNV_HS=1;TRIM_LEFT=9
chr3	47161755	47161849	SETD2_19.1.206345	.	GENE_ID=SETD2;Pool=1;PURPOSE=CDS;CNV_ID=SETD2;CNV_HS=1
chr3	47161849	47161964	SETD2_19.1.141916	.	GENE_ID=SETD2;Pool=2;PURPOSE=CDS;CNV_ID=SETD2;CNV_HS=1
chr3	47161888	47162010	SETD2_19.1.214377	.	GENE_ID=SETD2;Pool=1;PURPOSE=CDS;CNV_ID=SETD2;CNV_HS=1;TRIM_LEFT=6
chr3	47162010	47162089	SETD2_19.1.61647	.	GENE_ID=SETD2;Pool=2;PURPOSE=CDS;CNV_ID=SETD2;CNV_HS=1
chr3	47162048	47162175	SETD2_19.1.163828	.	GENE_ID=SETD2;Pool=1;PURPOSE=CDS;CNV_ID=SETD2;CNV_HS=1;TRIM_LEFT=3
chr3	47162154	47162231	SETD2_19.1.172083	.	GENE_ID=SETD2;Pool=2;PURPOSE=CDS;CNV_ID=SETD2;CNV_HS=1;TRIM_LEFT=2
chr3	47162212	47162294	SETD2_19.1.293340	.	GENE_ID=SETD2;Pool=1;PURPOSE=CDS;CNV_ID=SETD2;CNV_HS=1;TRIM_LEFT=5
chr3	47162278	47162350	SETD2_19.1.299071	.	GENE_ID=SETD2;Pool=2;PURPOSE=CDS;CNV_ID=SETD2;CNV_HS=1;TRIM_LEFT=8
chr3	47162329	47162432	SETD2_19.1.216779	.	GENE_ID=SETD2;Pool=1;PURPOSE=CDS;CNV_ID=SETD2;CNV_HS=1;TRIM_LEFT=4
chr3	47162418	47162507	SETD2_19.1.338093	.	GENE_ID=SETD2;Pool=2;PURPOSE=CDS;CNV_ID=SETD2;CNV_HS=1;TRIM_LEFT=6
chr3	47162469	47162568	SETD2_19.1.326398	.	GENE_ID=SETD2;Pool=1;PURPOSE=CDS;CNV_ID=SETD2;CNV_HS=1;TRIM_LEFT=5
chr3	47162567	47162678	SETD2_19.2.324235	.	GENE_ID=SETD2;Pool=2;PURPOSE=CDS;CNV_ID=SETD2;CNV_HS=1
chr3	47162611	47162731	SETD2_19.2.85328	.	GENE_ID=SETD2;Pool=1;PURPOSE=CDS;CNV_ID=SETD2;CNV_HS=1;TRIM_LEFT=3
chr3	47162728	47162801	SETD2_19.2.176772	.	GENE_ID=SETD2;Pool=2;PURPOSE=CDS;CNV_ID=SETD2;CNV_HS=1
chr3	47162777	47162899	SETD2_19.2.259712	.	GENE_ID=SETD2;Pool=1;PURPOSE=CDS;CNV_ID=SETD2;CNV_HS=1;TRIM_LEFT=6
chr3	47162870	47162945	SETD2_19.2.245612	.	GENE_ID=SETD2;Pool=2;PURPOSE=CDS;CNV_ID=SETD2;CNV_HS=1;TRIM_LEFT=4
chr3	47162937	47163062	SETD2_19.2.35788	.	GENE_ID=SETD2;Pool=1;PURPOSE=CDS;CNV_ID=SETD2;CNV_HS=1;TRIM_LEFT=6
chr3	47163026	47163137	SETD2_19.2.366705	.	GENE_ID=SETD2;Pool=2;PURPOSE=CDS;CNV_ID=SETD2;CNV_HS=1
chr3	47163107	47163220	SETD2_19.2.42547	.	GENE_ID=SETD2;Pool=1;PURPOSE=CDS;CNV_ID=SETD2;CNV_HS=1;TRIM_LEFT=4
chr3	47163187	47163260	SETD2_19.2.438726	.	GENE_ID=SETD2;Pool=2;PURPOSE=CDS;CNV_ID=SETD2;CNV_HS=1;TRIM_LEFT=7
chr3	47163259	47163383	SETD2_19.2.470393	.	GENE_ID=SETD2;Pool=1;PURPOSE=CDS;CNV_ID=SETD2;CNV_HS=1
chr3	47163378	47163451	SETD2_19.2.183757	.	GENE_ID=SETD2;Pool=2;PURPOSE=CDS;CNV_ID=SETD2;CNV_HS=1
chr3	47163421	47163534	SETD2_19.2.100299	.	GENE_ID=SETD2;Pool=1;PURPOSE=CDS;CNV_ID=SETD2;CNV_HS=1;TRIM_LEFT=5
chr3	47163516	47163597	SETD2_19.2.25375	.	GENE_ID=SETD2;Pool=2;PURPOSE=CDS;CNV_ID=SETD2;CNV_HS=1;TRIM_LEFT=10
chr3	47163570	47163695	SETD2_19.3.245736	.	GENE_ID=SETD2;Pool=1;PURPOSE=CDS;CNV_ID=SETD2;CNV_HS=1;TRIM_LEFT=9
chr3	47163660	47163746	SETD2_19.3.367352	.	GENE_ID=SETD2;Pool=2;PURPOSE=CDS;CNV_ID=SETD2;CNV_HS=1;TRIM_LEFT=10
chr3	47163737	47163847	SETD2_19.3.113089	.	GENE_ID=SETD2;Pool=1;PURPOSE=CDS;CNV_ID=SETD2;CNV_HS=1;TRIM_LEFT=2
chr3	47163809	47163902	SETD2_19.3.294292	.	GENE_ID=SETD2;Pool=2;PURPOSE=CDS;CNV_ID=SETD2;CNV_HS=1;TRIM_LEFT=6
chr3	47163902	47164010	SETD2_19.3.351672	.	GENE_ID=SETD2;Pool=1;PURPOSE=CDS;CNV_ID=SETD2;CNV_HS=1
chr3	47163986	47164059	SETD2_19.3.306539	.	GENE_ID=SETD2;Pool=2;PURPOSE=CDS;CNV_ID=SETD2;CNV_HS=1;TRIM_LEFT=7
chr3	47164055	47164163	SETD2_19.3.286337	.	GENE_ID=SETD2;Pool=1;PURPOSE=CDS;CNV_ID=SETD2;CNV_HS=1
chr3	47164154	47164243	SETD2_19.3.222218	.	GENE_ID=SETD2;Pool=2;PURPOSE=CDS;CNV_ID=SETD2;CNV_HS=1;TRIM_LEFT=4
chr3	47164214	47164331	SETD2_19.3.287167	.	GENE_ID=SETD2;Pool=1;PURPOSE=CDS;CNV_ID=SETD2;CNV_HS=1;TRIM_LEFT=9
chr3	47164314	47164426	SETD2_19.3.147761	.	GENE_ID=SETD2;Pool=2;PURPOSE=CDS;CNV_ID=SETD2;CNV_HS=1;TRIM_LEFT=5
chr3	47164378	47164483	SETD2_19.3.247895	.	GENE_ID=SETD2;Pool=1;PURPOSE=CDS;CNV_ID=SETD2;CNV_HS=1;TRIM_LEFT=11
chr3	47164480	47164547	SETD2_19.3.238715	.	GENE_ID=SETD2;Pool=2;PURPOSE=CDS;CNV_ID=SETD2;CNV_HS=1
chr3	47164516	47164628	SETD2_19.3.150843	.	GENE_ID=SETD2;Pool=1;PURPOSE=CDS;CNV_ID=SETD2;CNV_HS=1;TRIM_LEFT=4
chr3	47164627	47164701	SETD2_19.4.426584	.	GENE_ID=SETD2;Pool=2;PURPOSE=CDS;CNV_ID=SETD2;CNV_HS=1
chr3	47164670	47164796	SETD2_19.4.68357	.	GENE_ID=SETD2;Pool=1;PURPOSE=CDS;CNV_ID=SETD2;CNV_HS=1;TRIM_LEFT=6
chr3	47164780	47164851	SETD2_19.4.164876	.	GENE_ID=SETD2;Pool=2;PURPOSE=CDS;CNV_ID=SETD2;CNV_HS=1;TRIM_LEFT=8
chr3	47164829	47164943	SETD2_19.4.261880	.	GENE_ID=SETD2;Pool=1;PURPOSE=CDS;CNV_ID=SETD2;CNV_HS=1;TRIM_LEFT=5
chr3	47164910	47165001	SETD2_19.4.219832	.	GENE_ID=SETD2;Pool=2;PURPOSE=CDS;CNV_ID=SETD2;CNV_HS=1;TRIM_LEFT=4
chr3	47164990	47165093	SETD2_19.4.31260	.	GENE_ID=SETD2;Pool=1;PURPOSE=CDS;CNV_ID=SETD2;CNV_HS=1;TRIM_LEFT=9
chr3	47165085	47165156	SETD2_19.4.384994	.	GENE_ID=SETD2;Pool=2;PURPOSE=CDS;CNV_ID=SETD2;CNV_HS=1;TRIM_LEFT=5
chr3	47165145	47165249	SETD2_19.4.366472	.	GENE_ID=SETD2;Pool=1;PURPOSE=CDS;CNV_ID=SETD2;CNV_HS=1;TRIM_LEFT=4
chr3	47165246	47165350	SETD2_19.4.445884	.	GENE_ID=SETD2;Pool=2;PURPOSE=CDS;CNV_ID=SETD2;CNV_HS=1
chr3	47165312	47165433	SETD2_19.4.446484	.	GENE_ID=SETD2;Pool=1;PURPOSE=CDS;CNV_ID=SETD2;CNV_HS=1;TRIM_LEFT=7
chr3	47165424	47165498	SETD2_19.4.23414	.	GENE_ID=SETD2;Pool=2;PURPOSE=CDS;CNV_ID=SETD2;CNV_HS=1
chr3	47165468	47165589	SETD2_19.4.181627	.	GENE_ID=SETD2;Pool=1;PURPOSE=CDS;CNV_ID=SETD2;CNV_HS=1;TRIM_LEFT=5
chr3	47165535	47165626	SETD2_19.5.195301	.	GENE_ID=SETD2;Pool=2;PURPOSE=CDS;CNV_ID=SETD2;CNV_HS=1;TRIM_LEFT=6
chr3	47165626	47165717	SETD2_19.5.143283	.	GENE_ID=SETD2;Pool=1;PURPOSE=CDS;CNV_ID=SETD2;CNV_HS=1
chr3	47165692	47165769	SETD2_19.5.85274	.	GENE_ID=SETD2;Pool=2;PURPOSE=CDS;CNV_ID=SETD2;CNV_HS=1;TRIM_LEFT=6
chr3	47165758	47165880	SETD2_19.5.130609	.	GENE_ID=SETD2;Pool=1;PURPOSE=CDS;CNV_ID=SETD2;CNV_HS=1
chr3	47165880	47165954	SETD2_19.5.59814	.	GENE_ID=SETD2;Pool=2;PURPOSE=CDS;CNV_ID=SETD2;CNV_HS=1
chr3	47165918	47166036	SETD2_19.5.125465	.	GENE_ID=SETD2;Pool=1;PURPOSE=CDS;CNV_ID=SETD2;CNV_HS=1;TRIM_LEFT=5
chr3	47166012	47166082	SETD2_19.5.228104	.	GENE_ID=SETD2;Pool=2;PURPOSE=CDS;CNV_ID=SETD2;CNV_HS=1;TRIM_LEFT=6
chr3	47168078	47168159	SETD2_20.20925	.	GENE_ID=SETD2;Pool=1;PURPOSE=CDS;CNV_ID=SETD2;CNV_HS=1
chr3	47205243	47205378	SETD2_1.2856	.	GENE_ID=SETD2;Pool=2;PURPOSE=CDS;CNV_ID=SETD2;CNV_HS=1
chr3	47205346	47205482	SETD2_21.828	.	GENE_ID=SETD2;Pool=1;PURPOSE=CDS;CNV_ID=SETD2;CNV_HS=1;TRIM_LEFT=5
chr3	49412893	49413018	SP_137.117687	.	GENE_ID=RHOA;Pool=2;PURPOSE=Hotspot;CNV_ID=RHOA;CNV_HS=0
chr3	52436208	52436328	OCP1_BAP1_1	.	GENE_ID=BAP1;Pool=1;PURPOSE=CDS;CNV_ID=BAP1;CNV_HS=1
chr3	52436317	52436402	OCP1_BAP1_2	.	GENE_ID=BAP1;Pool=2;PURPOSE=CDS;CNV_ID=BAP1;CNV_HS=1;TRIM_LEFT=5
chr3	52436384	52436522	BAP1_1.5583	.	GENE_ID=BAP1;Pool=1;PURPOSE=CDS;CNV_ID=BAP1;CNV_HS=1;TRIM_LEFT=6
chr3	52436594	52436725	BAP1_2.35596	.	GENE_ID=BAP1;Pool=2;PURPOSE=CDS;CNV_ID=BAP1;CNV_HS=1
chr3	52436711	52436835	OCP1_BAP1_5	.	GENE_ID=BAP1;Pool=1;PURPOSE=CDS;CNV_ID=BAP1;CNV_HS=1;TRIM_LEFT=5
chr3	52436824	52436940	OCP1_BAP1_6	.	GENE_ID=BAP1;Pool=2;PURPOSE=CDS;CNV_ID=BAP1;CNV_HS=1;TRIM_LEFT=4
chr3	52437111	52437225	OCP1_BAP1_7	.	GENE_ID=BAP1;Pool=1;PURPOSE=CDS;CNV_ID=BAP1;CNV_HS=1
chr3	52437214	52437340	OCP1_BAP1_8	.	GENE_ID=BAP1;Pool=2;PURPOSE=CDS;CNV_ID=BAP1;CNV_HS=1;TRIM_LEFT=7
chr3	52437405	52437540	OCP1_BAP1_9	.	GENE_ID=BAP1;Pool=1;PURPOSE=CDS;CNV_ID=BAP1;CNV_HS=1
chr3	52437526	52437656	OCP1_BAP1_10	.	GENE_ID=BAP1;Pool=2;PURPOSE=CDS;CNV_ID=BAP1;CNV_HS=1
chr3	52437645	52437776	OCP1_BAP1_11	.	GENE_ID=BAP1;Pool=1;PURPOSE=CDS;CNV_ID=BAP1;CNV_HS=1
chr3	52437765	52437855	OCP1_BAP1_12	.	GENE_ID=BAP1;Pool=2;PURPOSE=CDS;CNV_ID=BAP1;CNV_HS=1;TRIM_LEFT=6
chr3	52437837	52437948	OCP1_BAP1_13	.	GENE_ID=BAP1;Pool=1;PURPOSE=CDS;CNV_ID=BAP1;CNV_HS=1;TRIM_LEFT=9
chr3	52438420	52438528	OCP1_BAP1_14	.	GENE_ID=BAP1;Pool=2;PURPOSE=CDS;CNV_ID=BAP1;CNV_HS=1
chr3	52438491	52438622	OCP1_BAP1_15	.	GENE_ID=BAP1;Pool=1;PURPOSE=CDS;CNV_ID=BAP1;CNV_HS=1
chr3	52439100	52439228	OCP1_BAP1_16	.	GENE_ID=BAP1;Pool=2;PURPOSE=CDS;CNV_ID=BAP1;CNV_HS=1
chr3	52439221	52439319	OCP1_BAP1_17	.	GENE_ID=BAP1;Pool=1;PURPOSE=CDS;CNV_ID=BAP1;CNV_HS=1;TRIM_LEFT=4
chr3	52439745	52439869	OCP1_BAP1_18	.	GENE_ID=BAP1;Pool=2;PURPOSE=CDS;CNV_ID=BAP1;CNV_HS=1
chr3	52439858	52439954	OCP1_BAP1_19	.	GENE_ID=BAP1;Pool=1;PURPOSE=CDS;CNV_ID=BAP1;CNV_HS=1;TRIM_LEFT=8
chr3	52440200	52440325	BAP1_9.59594	.	GENE_ID=BAP1;Pool=2;PURPOSE=CDS;CNV_ID=BAP1;CNV_HS=1
chr3	52440313	52440439	OCP1_BAP1_21	.	GENE_ID=BAP1;Pool=1;PURPOSE=CDS;CNV_ID=BAP1;CNV_HS=1;TRIM_LEFT=2
chr3	52440822	52440950	OCP1_BAP1_22	.	GENE_ID=BAP1;Pool=2;PURPOSE=CDS;CNV_ID=BAP1;CNV_HS=1
chr3	52441161	52441288	OCP1_BAP1_23	.	GENE_ID=BAP1;Pool=1;PURPOSE=CDS;CNV_ID=BAP1;CNV_HS=1
chr3	52441277	52441408	OCP1_BAP1_24	.	GENE_ID=BAP1;Pool=2;PURPOSE=CDS;CNV_ID=BAP1;CNV_HS=1;TRIM_LEFT=6
chr3	52441383	52441507	OCP1_BAP1_25	.	GENE_ID=BAP1;Pool=1;PURPOSE=CDS;CNV_ID=BAP1;CNV_HS=1;TRIM_LEFT=8
chr3	52441895	52441999	OCP1_BAP1_26	.	GENE_ID=BAP1;Pool=2;PURPOSE=CDS;CNV_ID=BAP1;CNV_HS=1
chr3	52441999	52442096	OCP1_BAP1_27	.	GENE_ID=BAP1;Pool=1;PURPOSE=CDS;CNV_ID=BAP1;CNV_HS=1
chr3	52442085	52442170	OCP1_BAP1_28	.	GENE_ID=BAP1;Pool=2;PURPOSE=CDS;CNV_ID=BAP1;CNV_HS=1;TRIM_LEFT=3
chr3	52442449	52442578	OCP1_BAP1_29	.	GENE_ID=BAP1;Pool=1;PURPOSE=CDS;CNV_ID=BAP1;CNV_HS=1
chr3	52442567	52442673	OCP1_BAP1_30	.	GENE_ID=BAP1;Pool=2;PURPOSE=CDS;CNV_ID=BAP1;CNV_HS=1;TRIM_LEFT=6
chr3	52443542	52443662	OCP1_BAP1_31	.	GENE_ID=BAP1;Pool=1;PURPOSE=CDS;CNV_ID=BAP1;CNV_HS=1
chr3	52443631	52443769	OCP1_BAP1_32	.	GENE_ID=BAP1;Pool=2;PURPOSE=CDS;CNV_ID=BAP1;CNV_HS=1;TRIM_LEFT=14
chr3	52443748	52443877	OCP1_BAP1_33	.	GENE_ID=BAP1;Pool=1;PURPOSE=CDS;CNV_ID=BAP1;CNV_HS=1;TRIM_LEFT=3
chr3	52443869	52444009	BAP1_17.5684	.	GENE_ID=BAP1;Pool=2;PURPOSE=CDS;CNV_ID=BAP1;CNV_HS=1
chr3	128199815	128199951	SP_138.19923	.	GENE_ID=GATA2;Pool=1;PURPOSE=Hotspot;CNV_ID=GATA2;CNV_HS=0
chr3	128200669	128200784	SP_139.8031	.	GENE_ID=GATA2;Pool=2;PURPOSE=Hotspot;CNV_ID=GATA2;CNV_HS=0
chr3	128202730	128202865	SP_140.19650	.	GENE_ID=GATA2;Pool=1;PURPOSE=Hotspot;CNV_ID=GATA2;CNV_HS=0
chr3	138374196	138374316	SP_141.49854	.	GENE_ID=PIK3CB;Pool=2;PURPOSE=CNV,Hotspot;CNV_ID=PIK3CB;CNV_HS=1
chr3	138374295	138374419	PIK3CB_1.83372	.	GENE_ID=PIK3CB;Pool=1;PURPOSE=CNV,Hotspot;CNV_ID=PIK3CB;CNV_HS=1;TRIM_LEFT=8
chr3	138376613	138376733	PIK3CB_3.50603	.	GENE_ID=PIK3CB;Pool=2;PURPOSE=CNV,Hotspot;CNV_ID=PIK3CB;CNV_HS=1
chr3	138402474	138402593	PIK3CB_7.60060	.	GENE_ID=PIK3CB;Pool=1;PURPOSE=CNV,Hotspot;CNV_ID=PIK3CB;CNV_HS=1
chr3	138407806	138407926	PIK3CB_9.4935	.	GENE_ID=PIK3CB;Pool=2;PURPOSE=CNV,Hotspot;CNV_ID=PIK3CB;CNV_HS=1
chr3	138417763	138417884	SP_142.46087	.	GENE_ID=PIK3CB;Pool=1;PURPOSE=CNV,Hotspot;CNV_ID=PIK3CB;CNV_HS=1
chr3	138423212	138423313	PIK3CB_13.58309	.	GENE_ID=PIK3CB;Pool=2;PURPOSE=CNV,Hotspot;CNV_ID=PIK3CB;CNV_HS=1
chr3	138433299	138433413	PIK3CB_16.58429	.	GENE_ID=PIK3CB;Pool=1;PURPOSE=CNV,Hotspot;CNV_ID=PIK3CB;CNV_HS=1
chr3	138453567	138453666	PIK3CB_18.57500	.	GENE_ID=PIK3CB;Pool=2;PURPOSE=CNV,Hotspot;CNV_ID=PIK3CB;CNV_HS=1
chr3	138461500	138461607	PIK3CB_20.81411	.	GENE_ID=PIK3CB;Pool=1;PURPOSE=CNV,Hotspot;CNV_ID=PIK3CB;CNV_HS=1
chr3	138477987	138478094	SP_143.14104	.	GENE_ID=PIK3CB;Pool=2;PURPOSE=CNV,Hotspot;CNV_ID=PIK3CB;CNV_HS=1
chr3	138665154	138665285	SP_144.12083	.	GENE_ID=FOXL2;Pool=1;PURPOSE=Hotspot;CNV_ID=FOXL2;CNV_HS=0
chr3	142168233	142168331	ATR_1.12159	.	GENE_ID=ATR;Pool=2;PURPOSE=CDS;CNV_ID=ATR;CNV_HS=1
chr3	142168327	142168439	ATR_1.61591	.	GENE_ID=ATR;Pool=1;PURPOSE=CDS;CNV_ID=ATR;CNV_HS=1
chr3	142168432	142168554	ATR_1.56774	.	GENE_ID=ATR;Pool=2;PURPOSE=CDS;CNV_ID=ATR;CNV_HS=1
chr3	142171964	142172040	ATR_2.4313	.	GENE_ID=ATR;Pool=1;PURPOSE=CDS;CNV_ID=ATR;CNV_HS=1
chr3	142172037	142172125	ATR_2.3762	.	GENE_ID=ATR;Pool=2;PURPOSE=CDS;CNV_ID=ATR;CNV_HS=1
chr3	142176417	142176499	ATR_3.43184	.	GENE_ID=ATR;Pool=1;PURPOSE=CDS;CNV_ID=ATR;CNV_HS=1
chr3	142176498	142176571	ATR_3.52883	.	GENE_ID=ATR;Pool=2;PURPOSE=CDS;CNV_ID=ATR;CNV_HS=1
chr3	142176542	142176658	ATR_3.47670	.	GENE_ID=ATR;Pool=1;PURPOSE=CDS;CNV_ID=ATR;CNV_HS=1;TRIM_LEFT=10
chr3	142177791	142177908	ATR_4.68302	.	GENE_ID=ATR;Pool=2;PURPOSE=CDS;CNV_ID=ATR;CNV_HS=1
chr3	142177861	142177943	ATR_4.50877	.	GENE_ID=ATR;Pool=1;PURPOSE=CDS;CNV_ID=ATR;CNV_HS=1;TRIM_LEFT=7
chr3	142177942	142178066	ATR_4.102090	.	GENE_ID=ATR;Pool=2;PURPOSE=CDS;CNV_ID=ATR;CNV_HS=1
chr3	142178064	142178149	ATR_5.35366	.	GENE_ID=ATR;Pool=1;PURPOSE=CDS;CNV_ID=ATR;CNV_HS=1
chr3	142178109	142178230	ATR_5.67981	.	GENE_ID=ATR;Pool=2;PURPOSE=CDS;CNV_ID=ATR;CNV_HS=1;TRIM_LEFT=6
chr3	142180769	142180897	ATR_6.6139	.	GENE_ID=ATR;Pool=1;PURPOSE=CDS;CNV_ID=ATR;CNV_HS=1
chr3	142180894	142181018	ATR_6.8471	.	GENE_ID=ATR;Pool=2;PURPOSE=CDS;CNV_ID=ATR;CNV_HS=1
chr3	142183865	142183982	ATR_1.16041	.	GENE_ID=ATR;Pool=1;PURPOSE=CDS;CNV_ID=ATR;CNV_HS=1
chr3	142183942	142184059	ATR_7.1089	.	GENE_ID=ATR;Pool=2;PURPOSE=CDS;CNV_ID=ATR;CNV_HS=1;TRIM_LEFT=5
chr3	142184033	142184104	ATR_7.17758	.	GENE_ID=ATR;Pool=1;PURPOSE=CDS;CNV_ID=ATR;CNV_HS=1;TRIM_LEFT=6
chr3	142185063	142185182	ATR_8.13760	.	GENE_ID=ATR;Pool=2;PURPOSE=CDS;CNV_ID=ATR;CNV_HS=1
chr3	142185175	142185280	ATR_8.19317	.	GENE_ID=ATR;Pool=1;PURPOSE=CDS;CNV_ID=ATR;CNV_HS=1
chr3	142185277	142185348	ATR_8.59033	.	GENE_ID=ATR;Pool=2;PURPOSE=CDS;CNV_ID=ATR;CNV_HS=1
chr3	142185326	142185445	ATR_8.86207	.	GENE_ID=ATR;Pool=1;PURPOSE=CDS;CNV_ID=ATR;CNV_HS=1;TRIM_LEFT=8
chr3	142186769	142186894	ATR_9.11260	.	GENE_ID=ATR;Pool=2;PURPOSE=CDS;CNV_ID=ATR;CNV_HS=1
chr3	142186829	142186904	ATR_9.16594	.	GENE_ID=ATR;Pool=1;PURPOSE=CDS;CNV_ID=ATR;CNV_HS=1;TRIM_LEFT=4
chr3	142188107	142188191	ATR_10.48771	.	GENE_ID=ATR;Pool=2;PURPOSE=CDS;CNV_ID=ATR;CNV_HS=1
chr3	142188190	142188283	ATR_10.21165	.	GENE_ID=ATR;Pool=1;PURPOSE=CDS;CNV_ID=ATR;CNV_HS=1
chr3	142188278	142188346	ATR_10.37992	.	GENE_ID=ATR;Pool=2;PURPOSE=CDS;CNV_ID=ATR;CNV_HS=1
chr3	142188333	142188444	ATR_10.280	.	GENE_ID=ATR;Pool=1;PURPOSE=CDS;CNV_ID=ATR;CNV_HS=1;TRIM_LEFT=3
chr3	142188920	142189037	ATR_11.42573	.	GENE_ID=ATR;Pool=2;PURPOSE=CDS;CNV_ID=ATR;CNV_HS=1
chr3	142203909	142204021	ATR_12.81830	.	GENE_ID=ATR;Pool=1;PURPOSE=CDS;CNV_ID=ATR;CNV_HS=1
chr3	142204018	142204133	ATR_12.9491	.	GENE_ID=ATR;Pool=2;PURPOSE=CDS;CNV_ID=ATR;CNV_HS=1
chr3	142211906	142212015	ATR_13.29006	.	GENE_ID=ATR;Pool=1;PURPOSE=CDS;CNV_ID=ATR;CNV_HS=1
chr3	142212015	142212112	ATR_13.49647	.	GENE_ID=ATR;Pool=2;PURPOSE=CDS;CNV_ID=ATR;CNV_HS=1
chr3	142212049	142212165	ATR_13.42975	.	GENE_ID=ATR;Pool=1;PURPOSE=CDS;CNV_ID=ATR;CNV_HS=1;TRIM_LEFT=6
chr3	142215107	142215235	ATR_2.17337	.	GENE_ID=ATR;Pool=2;PURPOSE=CDS;CNV_ID=ATR;CNV_HS=1
chr3	142215206	142215329	ATR_14.4592	.	GENE_ID=ATR;Pool=1;PURPOSE=CDS;CNV_ID=ATR;CNV_HS=1;TRIM_LEFT=5
chr3	142215273	142215376	ATR_14.75132	.	GENE_ID=ATR;Pool=2;PURPOSE=CDS;CNV_ID=ATR;CNV_HS=1;TRIM_LEFT=5
chr3	142215798	142215881	ATR_15.1943	.	GENE_ID=ATR;Pool=1;PURPOSE=CDS;CNV_ID=ATR;CNV_HS=1
chr3	142215871	142215941	ATR_15.69192	.	GENE_ID=ATR;Pool=2;PURPOSE=CDS;CNV_ID=ATR;CNV_HS=1;TRIM_LEFT=5
chr3	142215913	142216034	ATR_15.48158	.	GENE_ID=ATR;Pool=1;PURPOSE=CDS;CNV_ID=ATR;CNV_HS=1;TRIM_LEFT=5
chr3	142216019	142216124	ATR_15.50714	.	GENE_ID=ATR;Pool=2;PURPOSE=CDS;CNV_ID=ATR;CNV_HS=1;TRIM_LEFT=6
chr3	142217416	142217496	ATR_16.110427	.	GENE_ID=ATR;Pool=1;PURPOSE=CDS;CNV_ID=ATR;CNV_HS=1
chr3	142217485	142217617	ATR_3.50128	.	GENE_ID=ATR;Pool=2;PURPOSE=CDS;CNV_ID=ATR;CNV_HS=1;TRIM_LEFT=2
chr3	142217612	142217689	ATR_16.29431	.	GENE_ID=ATR;Pool=1;PURPOSE=CDS;CNV_ID=ATR;CNV_HS=1;TRIM_LEFT=3
chr3	142218453	142218554	ATR_17.25838	.	GENE_ID=ATR;Pool=2;PURPOSE=CDS;CNV_ID=ATR;CNV_HS=1
chr3	142218516	142218601	ATR_17.8434	.	GENE_ID=ATR;Pool=1;PURPOSE=CDS;CNV_ID=ATR;CNV_HS=1;TRIM_LEFT=6
chr3	142222187	142222253	ATR_18.16761	.	GENE_ID=ATR;Pool=2;PURPOSE=CDS;CNV_ID=ATR;CNV_HS=1
chr3	142222220	142222327	ATR_18.32394	.	GENE_ID=ATR;Pool=1;PURPOSE=CDS;CNV_ID=ATR;CNV_HS=1;TRIM_LEFT=4
chr3	142223966	142224062	ATR_19.77145	.	GENE_ID=ATR;Pool=2;PURPOSE=CDS;CNV_ID=ATR;CNV_HS=1
chr3	142224028	142224111	ATR_19.57198	.	GENE_ID=ATR;Pool=1;PURPOSE=CDS;CNV_ID=ATR;CNV_HS=1;TRIM_LEFT=3
chr3	142224103	142224186	ATR_19.109147	.	GENE_ID=ATR;Pool=2;PURPOSE=CDS;CNV_ID=ATR;CNV_HS=1;TRIM_LEFT=6
chr3	142226734	142226822	ATR_20.24176	.	GENE_ID=ATR;Pool=1;PURPOSE=CDS;CNV_ID=ATR;CNV_HS=1
chr3	142226795	142226922	ATR_20.14956	.	GENE_ID=ATR;Pool=2;PURPOSE=CDS;CNV_ID=ATR;CNV_HS=1;TRIM_LEFT=7
chr3	142231064	142231136	ATR_21.30447	.	GENE_ID=ATR;Pool=1;PURPOSE=CDS;CNV_ID=ATR;CNV_HS=1
chr3	142231111	142231217	ATR_21.25627	.	GENE_ID=ATR;Pool=2;PURPOSE=CDS;CNV_ID=ATR;CNV_HS=1;TRIM_LEFT=5
chr3	142231213	142231286	ATR_21.28279	.	GENE_ID=ATR;Pool=1;PURPOSE=CDS;CNV_ID=ATR;CNV_HS=1;TRIM_LEFT=2
chr3	142231257	142231370	ATR_21.47958	.	GENE_ID=ATR;Pool=2;PURPOSE=CDS;CNV_ID=ATR;CNV_HS=1;TRIM_LEFT=6
chr3	142232259	142232358	ATR_22.25246	.	GENE_ID=ATR;Pool=1;PURPOSE=CDS;CNV_ID=ATR;CNV_HS=1
chr3	142232351	142232473	ATR_22.7236	.	GENE_ID=ATR;Pool=2;PURPOSE=CDS;CNV_ID=ATR;CNV_HS=1
chr3	142232411	142232486	ATR_22.52786	.	GENE_ID=ATR;Pool=1;PURPOSE=CDS;CNV_ID=ATR;CNV_HS=1;TRIM_LEFT=7
chr3	142234212	142234331	ATR_23.40356	.	GENE_ID=ATR;Pool=2;PURPOSE=CDS;CNV_ID=ATR;CNV_HS=1
chr3	142234331	142234416	ATR_23.84534	.	GENE_ID=ATR;Pool=1;PURPOSE=CDS;CNV_ID=ATR;CNV_HS=1
chr3	142238439	142238547	ATR_4.35439	.	GENE_ID=ATR;Pool=2;PURPOSE=CDS;CNV_ID=ATR;CNV_HS=1
chr3	142238514	142238640	ATR_24.67590	.	GENE_ID=ATR;Pool=1;PURPOSE=CDS;CNV_ID=ATR;CNV_HS=1;TRIM_LEFT=6
chr3	142241501	142241590	ATR_25.13440	.	GENE_ID=ATR;Pool=2;PURPOSE=CDS;CNV_ID=ATR;CNV_HS=1
chr3	142241588	142241708	ATR_25.37745	.	GENE_ID=ATR;Pool=1;PURPOSE=CDS;CNV_ID=ATR;CNV_HS=1
chr3	142242828	142242927	ATR_26.6022	.	GENE_ID=ATR;Pool=2;PURPOSE=CDS;CNV_ID=ATR;CNV_HS=1
chr3	142242907	142242995	ATR_26.42811	.	GENE_ID=ATR;Pool=1;PURPOSE=CDS;CNV_ID=ATR;CNV_HS=1;TRIM_LEFT=6
chr3	142242962	142243090	ATR_26.81329	.	GENE_ID=ATR;Pool=2;PURPOSE=CDS;CNV_ID=ATR;CNV_HS=1;TRIM_LEFT=5
chr3	142253881	142253951	ATR_27.60260	.	GENE_ID=ATR;Pool=1;PURPOSE=CDS;CNV_ID=ATR;CNV_HS=1
chr3	142253949	142254053	ATR_27.7917	.	GENE_ID=ATR;Pool=2;PURPOSE=CDS;CNV_ID=ATR;CNV_HS=1
chr3	142254936	142255036	ATR_28.32199	.	GENE_ID=ATR;Pool=1;PURPOSE=CDS;CNV_ID=ATR;CNV_HS=1
chr3	142254985	142255095	ATR_28.31564	.	GENE_ID=ATR;Pool=2;PURPOSE=CDS;CNV_ID=ATR;CNV_HS=1;TRIM_LEFT=6
chr3	142257260	142257340	ATR_29.39931	.	GENE_ID=ATR;Pool=1;PURPOSE=CDS;CNV_ID=ATR;CNV_HS=1
chr3	142257340	142257455	ATR_29.60028	.	GENE_ID=ATR;Pool=2;PURPOSE=CDS;CNV_ID=ATR;CNV_HS=1
chr3	142257421	142257519	ATR_29.5397	.	GENE_ID=ATR;Pool=1;PURPOSE=CDS;CNV_ID=ATR;CNV_HS=1;TRIM_LEFT=5
chr3	142259680	142259750	ATR_30.6385	.	GENE_ID=ATR;Pool=2;PURPOSE=CDS;CNV_ID=ATR;CNV_HS=1
chr3	142259750	142259870	ATR_30.91536	.	GENE_ID=ATR;Pool=1;PURPOSE=CDS;CNV_ID=ATR;CNV_HS=1
chr3	142259824	142259899	ATR_30.79867	.	GENE_ID=ATR;Pool=2;PURPOSE=CDS;CNV_ID=ATR;CNV_HS=1
chr3	142261501	142261582	ATR_31.10694	.	GENE_ID=ATR;Pool=1;PURPOSE=CDS;CNV_ID=ATR;CNV_HS=1
chr3	142261511	142261627	ATR_5.3996	.	GENE_ID=ATR;Pool=2;PURPOSE=CDS;CNV_ID=ATR;CNV_HS=1;TRIM_LEFT=5
chr3	142266491	142266572	ATR_32.74592	.	GENE_ID=ATR;Pool=1;PURPOSE=CDS;CNV_ID=ATR;CNV_HS=1
chr3	142266572	142266660	ATR_32.8718	.	GENE_ID=ATR;Pool=2;PURPOSE=CDS;CNV_ID=ATR;CNV_HS=1
chr3	142266630	142266706	ATR_32.87427	.	GENE_ID=ATR;Pool=1;PURPOSE=CDS;CNV_ID=ATR;CNV_HS=1;TRIM_LEFT=5
chr3	142266704	142266823	ATR_32.73488	.	GENE_ID=ATR;Pool=2;PURPOSE=CDS;CNV_ID=ATR;CNV_HS=1
chr3	142268262	142268337	ATR_33.53312	.	GENE_ID=ATR;Pool=1;PURPOSE=CDS;CNV_ID=ATR;CNV_HS=1
chr3	142268337	142268449	ATR_33.11099	.	GENE_ID=ATR;Pool=2;PURPOSE=CDS;CNV_ID=ATR;CNV_HS=1
chr3	142268446	142268511	ATR_33.29115	.	GENE_ID=ATR;Pool=1;PURPOSE=CDS;CNV_ID=ATR;CNV_HS=1
chr3	142268480	142268574	ATR_33.12829	.	GENE_ID=ATR;Pool=2;PURPOSE=CDS;CNV_ID=ATR;CNV_HS=1;TRIM_LEFT=7
chr3	142268965	142269040	ATR_34.139415	.	GENE_ID=ATR;Pool=1;PURPOSE=CDS;CNV_ID=ATR;CNV_HS=1
chr3	142269040	142269111	ATR_34.93014	.	GENE_ID=ATR;Pool=2;PURPOSE=CDS;CNV_ID=ATR;CNV_HS=1
chr3	142269074	142269149	ATR_34.35863	.	GENE_ID=ATR;Pool=1;PURPOSE=CDS;CNV_ID=ATR;CNV_HS=1
chr3	142272063	142272186	ATR_35.40583	.	GENE_ID=ATR;Pool=2;PURPOSE=CDS;CNV_ID=ATR;CNV_HS=1
chr3	142272160	142272232	ATR_35.21168	.	GENE_ID=ATR;Pool=1;PURPOSE=CDS;CNV_ID=ATR;CNV_HS=1;TRIM_LEFT=7
chr3	142272230	142272314	ATR_35.54264	.	GENE_ID=ATR;Pool=2;PURPOSE=CDS;CNV_ID=ATR;CNV_HS=1
chr3	142272474	142272595	ATR_36.52303	.	GENE_ID=ATR;Pool=1;PURPOSE=CDS;CNV_ID=ATR;CNV_HS=1
chr3	142272584	142272676	ATR_36.51605	.	GENE_ID=ATR;Pool=2;PURPOSE=CDS;CNV_ID=ATR;CNV_HS=1;TRIM_LEFT=5
chr3	142272671	142272773	ATR_37.67138	.	GENE_ID=ATR;Pool=1;PURPOSE=CDS;CNV_ID=ATR;CNV_HS=1
chr3	142272756	142272851	ATR_37.49719	.	GENE_ID=ATR;Pool=2;PURPOSE=CDS;CNV_ID=ATR;CNV_HS=1;TRIM_LEFT=5
chr3	142272824	142272917	ATR_37.10065	.	GENE_ID=ATR;Pool=1;PURPOSE=CDS;CNV_ID=ATR;CNV_HS=1;TRIM_LEFT=5
chr3	142274686	142274806	ATR_38.25797	.	GENE_ID=ATR;Pool=2;PURPOSE=CDS;CNV_ID=ATR;CNV_HS=1
chr3	142274800	142274878	ATR_38.31473	.	GENE_ID=ATR;Pool=1;PURPOSE=CDS;CNV_ID=ATR;CNV_HS=1
chr3	142274847	142274962	ATR_38.120816	.	GENE_ID=ATR;Pool=2;PURPOSE=CDS;CNV_ID=ATR;CNV_HS=1;TRIM_LEFT=3
chr3	142274941	142275037	ATR_38.31113	.	GENE_ID=ATR;Pool=1;PURPOSE=CDS;CNV_ID=ATR;CNV_HS=1;TRIM_LEFT=10
chr3	142275186	142275277	ATR_39.15233	.	GENE_ID=ATR;Pool=2;PURPOSE=CDS;CNV_ID=ATR;CNV_HS=1
chr3	142275259	142275395	ATR_39.60418	.	GENE_ID=ATR;Pool=1;PURPOSE=CDS;CNV_ID=ATR;CNV_HS=1;TRIM_LEFT=8
chr3	142277458	142277536	ATR_40.549	.	GENE_ID=ATR;Pool=2;PURPOSE=CDS;CNV_ID=ATR;CNV_HS=1
chr3	142277471	142277601	ATR_40.11371	.	GENE_ID=ATR;Pool=1;PURPOSE=CDS;CNV_ID=ATR;CNV_HS=1
chr3	142277605	142277710	ATR_40.35990	.	GENE_ID=ATR;Pool=2;PURPOSE=CDS;CNV_ID=ATR;CNV_HS=1
chr3	142278086	142278195	ATR_41.62928	.	GENE_ID=ATR;Pool=1;PURPOSE=CDS;CNV_ID=ATR;CNV_HS=1
chr3	142278177	142278246	ATR_41.56755	.	GENE_ID=ATR;Pool=2;PURPOSE=CDS;CNV_ID=ATR;CNV_HS=1;TRIM_LEFT=5
chr3	142278243	142278354	ATR_41.77152	.	GENE_ID=ATR;Pool=1;PURPOSE=CDS;CNV_ID=ATR;CNV_HS=1
chr3	142279034	142279129	ATR_42.70156	.	GENE_ID=ATR;Pool=2;PURPOSE=CDS;CNV_ID=ATR;CNV_HS=1
chr3	142279107	142279176	ATR_42.35430	.	GENE_ID=ATR;Pool=1;PURPOSE=CDS;CNV_ID=ATR;CNV_HS=1;TRIM_LEFT=3
chr3	142279167	142279272	ATR_42.33732	.	GENE_ID=ATR;Pool=2;PURPOSE=CDS;CNV_ID=ATR;CNV_HS=1;TRIM_LEFT=6
chr3	142280078	142280161	ATR_43.79297	.	GENE_ID=ATR;Pool=1;PURPOSE=CDS;CNV_ID=ATR;CNV_HS=1
chr3	142280139	142280216	ATR_43.94523	.	GENE_ID=ATR;Pool=2;PURPOSE=CDS;CNV_ID=ATR;CNV_HS=1;TRIM_LEFT=8
chr3	142280204	142280322	ATR_43.86859	.	GENE_ID=ATR;Pool=1;PURPOSE=CDS;CNV_ID=ATR;CNV_HS=1;TRIM_LEFT=6
chr3	142281062	142281128	ATR_44.325734	.	GENE_ID=ATR;Pool=2;PURPOSE=CDS;CNV_ID=ATR;CNV_HS=1
chr3	142281083	142281203	ATR_44.62388	.	GENE_ID=ATR;Pool=1;PURPOSE=CDS;CNV_ID=ATR;CNV_HS=1;TRIM_LEFT=4
chr3	142281193	142281264	ATR_44.82302	.	GENE_ID=ATR;Pool=2;PURPOSE=CDS;CNV_ID=ATR;CNV_HS=1
chr3	142281241	142281363	ATR_44.227397	.	GENE_ID=ATR;Pool=1;PURPOSE=CDS;CNV_ID=ATR;CNV_HS=1;TRIM_LEFT=8
chr3	142281351	142281457	ATR_44.246836	.	GENE_ID=ATR;Pool=2;PURPOSE=CDS;CNV_ID=ATR;CNV_HS=1;TRIM_LEFT=6
chr3	142281409	142281535	ATR_44.342220	.	GENE_ID=ATR;Pool=1;PURPOSE=CDS;CNV_ID=ATR;CNV_HS=1;TRIM_LEFT=10
chr3	142281533	142281645	ATR_44.87221	.	GENE_ID=ATR;Pool=2;PURPOSE=CDS;CNV_ID=ATR;CNV_HS=1
chr3	142281576	142281703	ATR_44.238325	.	GENE_ID=ATR;Pool=1;PURPOSE=CDS;CNV_ID=ATR;CNV_HS=1;TRIM_LEFT=11
chr3	142281690	142281759	ATR_44.11665	.	GENE_ID=ATR;Pool=2;PURPOSE=CDS;CNV_ID=ATR;CNV_HS=1;TRIM_LEFT=4
chr3	142281752	142281860	ATR_44.169297	.	GENE_ID=ATR;Pool=1;PURPOSE=CDS;CNV_ID=ATR;CNV_HS=1
chr3	142281851	142281920	ATR_44.101216	.	GENE_ID=ATR;Pool=2;PURPOSE=CDS;CNV_ID=ATR;CNV_HS=1;TRIM_LEFT=7
chr3	142281905	142282006	ATR_44.346483	.	GENE_ID=ATR;Pool=1;PURPOSE=CDS;CNV_ID=ATR;CNV_HS=1;TRIM_LEFT=9
chr3	142284940	142285010	ATR_45.27497	.	GENE_ID=ATR;Pool=2;PURPOSE=CDS;CNV_ID=ATR;CNV_HS=1
chr3	142284959	142285076	ATR_45.44045	.	GENE_ID=ATR;Pool=1;PURPOSE=CDS;CNV_ID=ATR;CNV_HS=1;TRIM_LEFT=5
chr3	142285062	142285145	ATR_45.72287	.	GENE_ID=ATR;Pool=2;PURPOSE=CDS;CNV_ID=ATR;CNV_HS=1;TRIM_LEFT=5
chr3	142286832	142286947	ATR_46.6503	.	GENE_ID=ATR;Pool=1;PURPOSE=CDS;CNV_ID=ATR;CNV_HS=1
chr3	142286917	142287013	ATR_46.7168	.	GENE_ID=ATR;Pool=2;PURPOSE=CDS;CNV_ID=ATR;CNV_HS=1;TRIM_LEFT=6
chr3	142297462	142297561	ATR_47.3625	.	GENE_ID=ATR;Pool=1;PURPOSE=CDS;CNV_ID=ATR;CNV_HS=1
chr3	178916548	178916627	PIK3CA_1.149620	.	GENE_ID=PIK3CA;Pool=2;PURPOSE=CNV,Hotspot;CNV_ID=PIK3CA;CNV_HS=1
chr3	178916844	178916946	SP_145.126498	.	GENE_ID=PIK3CA;Pool=1;PURPOSE=CNV,Hotspot;CNV_ID=PIK3CA;CNV_HS=1
chr3	178916935	178917035	SP_145.173542	.	GENE_ID=PIK3CA;Pool=2;PURPOSE=CNV,Hotspot;CNV_ID=PIK3CA;CNV_HS=1;TRIM_LEFT=9
chr3	178917416	178917537	SP_145.47434	.	GENE_ID=PIK3CA;Pool=1;PURPOSE=CNV,Hotspot;CNV_ID=PIK3CA;CNV_HS=1
chr3	178921450	178921571	SP_146.4921	.	GENE_ID=PIK3CA;Pool=2;PURPOSE=CNV,Hotspot;CNV_ID=PIK3CA;CNV_HS=1
chr3	178927933	178928022	SP_147.13724	.	GENE_ID=PIK3CA;Pool=1;PURPOSE=CNV,Hotspot;CNV_ID=PIK3CA;CNV_HS=1
chr3	178927991	178928093	SP_147.22659	.	GENE_ID=PIK3CA;Pool=2;PURPOSE=CNV,Hotspot;CNV_ID=PIK3CA;CNV_HS=1;TRIM_LEFT=6
chr3	178936052	178936179	SP_148.9816	.	GENE_ID=PIK3CA;Pool=1;PURPOSE=CNV,Hotspot;CNV_ID=PIK3CA;CNV_HS=1
chr3	178936969	178937079	PIK3CA_10.2884	.	GENE_ID=PIK3CA;Pool=2;PURPOSE=CNV,Hotspot;CNV_ID=PIK3CA;CNV_HS=1
chr3	178938835	178938960	SP_149.33089	.	GENE_ID=PIK3CA;Pool=1;PURPOSE=CNV,Hotspot;CNV_ID=PIK3CA;CNV_HS=1
chr3	178951990	178952114	SP_150.100237	.	GENE_ID=PIK3CA;Pool=2;PURPOSE=CNV,Hotspot;CNV_ID=PIK3CA;CNV_HS=1
chr4	1795640	1795780	FGFR3_1.3539	.	GENE_ID=FGFR3;Pool=2;PURPOSE=CNV,Hotspot;CNV_ID=FGFR3;CNV_HS=1
chr4	1801361	1801492	SP_151.14381	.	GENE_ID=FGFR3;Pool=1;PURPOSE=CNV,Hotspot;CNV_ID=FGFR3;CNV_HS=1
chr4	1803463	1803603	SP_152.3193	.	GENE_ID=FGFR3;Pool=2;PURPOSE=CNV,Hotspot;CNV_ID=FGFR3;CNV_HS=1
chr4	1803471	1803608	FGFR3_1.3313	.	GENE_ID=FGFR3;Pool=1;PURPOSE=CNV,Hotspot;CNV_ID=FGFR3;CNV_HS=1;TRIM_LEFT=7
chr4	1805474	1805610	FGFR3_8.4949	.	GENE_ID=FGFR3;Pool=2;PURPOSE=CNV,Hotspot;CNV_ID=FGFR3;CNV_HS=1
chr4	1806084	1806217	SP_153.66869	.	GENE_ID=FGFR3;Pool=1;PURPOSE=CNV,Hotspot;CNV_ID=FGFR3;CNV_HS=1
chr4	1806461	1806599	SP_153.55414	.	GENE_ID=FGFR3;Pool=2;PURPOSE=CNV,Hotspot;CNV_ID=FGFR3;CNV_HS=1
chr4	1807297	1807386	FGFR3_12.40457	.	GENE_ID=FGFR3;Pool=1;PURPOSE=CNV,Hotspot;CNV_ID=FGFR3;CNV_HS=1
chr4	1807840	1807929	SP_154.26173	.	GENE_ID=FGFR3;Pool=2;PURPOSE=CNV,Hotspot;CNV_ID=FGFR3;CNV_HS=1
chr4	1808001	1808095	SP_154.52022	.	GENE_ID=FGFR3;Pool=1;PURPOSE=CNV,Hotspot;CNV_ID=FGFR3;CNV_HS=1
chr4	1808261	1808399	SP_154.55514	.	GENE_ID=FGFR3;Pool=2;PURPOSE=CNV,Hotspot;CNV_ID=FGFR3;CNV_HS=1
chr4	55141006	55141128	PDGFRA_1.48322	.	GENE_ID=PDGFRA;Pool=1;PURPOSE=CNV,Hotspot;CNV_ID=PDGFRA;CNV_HS=1
chr4	55141128	55141200	PDGFRA_1.57796	.	GENE_ID=PDGFRA;Pool=2;PURPOSE=CNV,Hotspot;CNV_ID=PDGFRA;CNV_HS=1
chr4	55143546	55143656	PDGFRA_2.70856	.	GENE_ID=PDGFRA;Pool=1;PURPOSE=CNV,Hotspot;CNV_ID=PDGFRA;CNV_HS=1
chr4	55143624	55143700	PDGFRA_2.27450	.	GENE_ID=PDGFRA;Pool=2;PURPOSE=CNV,Hotspot;CNV_ID=PDGFRA;CNV_HS=1;TRIM_LEFT=4
chr4	55144045	55144181	PDGFRA_3.74235	.	GENE_ID=PDGFRA;Pool=1;PURPOSE=CNV,Hotspot;CNV_ID=PDGFRA;CNV_HS=1
chr4	55144521	55144648	PDGFRA_4.43140	.	GENE_ID=PDGFRA;Pool=2;PURPOSE=CNV,Hotspot;CNV_ID=PDGFRA;CNV_HS=1
chr4	55144613	55144688	PDGFRA_4.58215	.	GENE_ID=PDGFRA;Pool=1;PURPOSE=CNV,Hotspot;CNV_ID=PDGFRA;CNV_HS=1;TRIM_LEFT=7
chr4	55151472	55151541	PDGFRA_5.6758	.	GENE_ID=PDGFRA;Pool=2;PURPOSE=CNV,Hotspot;CNV_ID=PDGFRA;CNV_HS=1
chr4	55151540	55151664	PDGFRA_5.8832	.	GENE_ID=PDGFRA;Pool=1;PURPOSE=CNV,Hotspot;CNV_ID=PDGFRA;CNV_HS=1
chr4	55152005	55152130	PDGFRA_6.47592	.	GENE_ID=PDGFRA;Pool=2;PURPOSE=CNV,Hotspot;CNV_ID=PDGFRA;CNV_HS=1
chr4	55153580	55153687	PDGFRA_7.73587	.	GENE_ID=PDGFRA;Pool=1;PURPOSE=CNV,Hotspot;CNV_ID=PDGFRA;CNV_HS=1
chr4	55153652	55153728	PDGFRA_7.15311	.	GENE_ID=PDGFRA;Pool=2;PURPOSE=CNV,Hotspot;CNV_ID=PDGFRA;CNV_HS=1;TRIM_LEFT=6
chr4	55154919	55155004	PDGFRA_8.35113	.	GENE_ID=PDGFRA;Pool=1;PURPOSE=CNV,Hotspot;CNV_ID=PDGFRA;CNV_HS=1
chr4	55154967	55155093	PDGFRA_8.74327	.	GENE_ID=PDGFRA;Pool=2;PURPOSE=CNV,Hotspot;CNV_ID=PDGFRA;CNV_HS=1;TRIM_LEFT=3
chr4	55155166	55155296	PDGFRA_9.39391	.	GENE_ID=PDGFRA;Pool=1;PURPOSE=CNV,Hotspot;CNV_ID=PDGFRA;CNV_HS=1
chr4	55589727	55589851	SP_158.37803	.	GENE_ID=KIT;Pool=2;PURPOSE=CNV,Hotspot;CNV_ID=KIT;CNV_HS=1
chr4	55592135	55592254	SP_159.11132	.	GENE_ID=KIT;Pool=1;PURPOSE=CNV,Hotspot;CNV_ID=KIT;CNV_HS=1
chr4	55593391	55593513	SP_160.33594	.	GENE_ID=KIT;Pool=2;PURPOSE=CNV,Hotspot;CNV_ID=KIT;CNV_HS=1
chr4	55593534	55593606	KIT_1.45946	.	GENE_ID=KIT;Pool=1;PURPOSE=CNV,Hotspot;CNV_ID=KIT;CNV_HS=1
chr4	55593581	55593700	KIT_1.52658	.	GENE_ID=KIT;Pool=2;PURPOSE=CNV,Hotspot;CNV_ID=KIT;CNV_HS=1;TRIM_LEFT=7
chr4	55593682	55593753	KIT_1.7496	.	GENE_ID=KIT;Pool=1;PURPOSE=CNV,Hotspot;CNV_ID=KIT;CNV_HS=1;TRIM_LEFT=5
chr4	55593979	55594096	KIT_2.33829	.	GENE_ID=KIT;Pool=2;PURPOSE=CNV,Hotspot;CNV_ID=KIT;CNV_HS=1
chr4	55594144	55594218	KIT_3.50964	.	GENE_ID=KIT;Pool=1;PURPOSE=CNV,Hotspot;CNV_ID=KIT;CNV_HS=1
chr4	55594181	55594300	KIT_3.97920	.	GENE_ID=KIT;Pool=2;PURPOSE=CNV,Hotspot;CNV_ID=KIT;CNV_HS=1;TRIM_LEFT=5
chr4	55595497	55595605	KIT_4.48080	.	GENE_ID=KIT;Pool=1;PURPOSE=CNV,Hotspot;CNV_ID=KIT;CNV_HS=1
chr4	55595596	55595664	KIT_4.86331	.	GENE_ID=KIT;Pool=2;PURPOSE=CNV,Hotspot;CNV_ID=KIT;CNV_HS=1
chr4	55597488	55597592	KIT_5.87650	.	GENE_ID=KIT;Pool=1;PURPOSE=CNV,Hotspot;CNV_ID=KIT;CNV_HS=1
chr4	55597983	55598078	KIT_6.73590	.	GENE_ID=KIT;Pool=2;PURPOSE=CNV,Hotspot;CNV_ID=KIT;CNV_HS=1
chr4	55598047	55598167	KIT_6.44189	.	GENE_ID=KIT;Pool=1;PURPOSE=CNV,Hotspot;CNV_ID=KIT;CNV_HS=1;TRIM_LEFT=8
chr4	55599233	55599357	KIT_7.4898	.	GENE_ID=KIT;Pool=2;PURPOSE=CNV,Hotspot;CNV_ID=KIT;CNV_HS=1
chr4	55602626	55602697	KIT_8.84668	.	GENE_ID=KIT;Pool=1;PURPOSE=CNV,Hotspot;CNV_ID=KIT;CNV_HS=1
chr4	55602664	55602775	KIT_8.87691	.	GENE_ID=KIT;Pool=2;PURPOSE=CNV,Hotspot;CNV_ID=KIT;CNV_HS=1
chr4	55602871	55603000	KIT_9.68576	.	GENE_ID=KIT;Pool=1;PURPOSE=CNV,Hotspot;CNV_ID=KIT;CNV_HS=1
chr4	55603337	55603448	KIT_10.60680	.	GENE_ID=KIT;Pool=2;PURPOSE=CNV,Hotspot;CNV_ID=KIT;CNV_HS=1
chr4	55955797	55955918	SP_162.88893	.	GENE_ID=KDR;Pool=1;PURPOSE=Hotspot;CNV_ID=KDR;CNV_HS=0
chr4	55956118	55956238	SP_162.63175	.	GENE_ID=KDR;Pool=2;PURPOSE=Hotspot;CNV_ID=KDR;CNV_HS=0
chr4	55964819	55964941	SP_163.1165	.	GENE_ID=KDR;Pool=1;PURPOSE=Hotspot;CNV_ID=KDR;CNV_HS=0
chr4	55972822	55972946	SP_164.30020	.	GENE_ID=KDR;Pool=2;PURPOSE=Hotspot;CNV_ID=KDR;CNV_HS=0
chr4	153243998	153244112	OCP1_FBXW7_1	.	GENE_ID=FBXW7;Pool=1;PURPOSE=CDS;CNV_ID=FBXW7;CNV_HS=1
chr4	153244096	153244196	OCP1_FBXW7_2	.	GENE_ID=FBXW7;Pool=2;PURPOSE=CDS;CNV_ID=FBXW7;CNV_HS=1;TRIM_LEFT=5
chr4	153244185	153244295	OCP1_FBXW7_3	.	GENE_ID=FBXW7;Pool=1;PURPOSE=CDS;CNV_ID=FBXW7;CNV_HS=1;TRIM_LEFT=7
chr4	153244289	153244409	OCP1_FBXW7_4	.	GENE_ID=FBXW7;Pool=2;PURPOSE=CDS;CNV_ID=FBXW7;CNV_HS=1
chr4	153245326	153245417	OCP1_FBXW7_5	.	GENE_ID=FBXW7;Pool=1;PURPOSE=CDS;CNV_ID=FBXW7;CNV_HS=1
chr4	153245410	153245492	CHP2_FBXW7_5	.	GENE_ID=FBXW7;Pool=2;PURPOSE=CDS;CNV_ID=FBXW7;CNV_HS=1
chr4	153245483	153245578	OCP1_FBXW7_6	.	GENE_ID=FBXW7;Pool=1;PURPOSE=CDS;CNV_ID=FBXW7;CNV_HS=1
chr4	153247142	153247238	OCP1_FBXW7_7	.	GENE_ID=FBXW7;Pool=2;PURPOSE=CDS;CNV_ID=FBXW7;CNV_HS=1
chr4	153247277	153247369	CHP2_FBXW7_4	.	GENE_ID=FBXW7;Pool=1;PURPOSE=CDS;CNV_ID=FBXW7;CNV_HS=1
chr4	153249355	153249477	CHP2_FBXW7_3	.	GENE_ID=FBXW7;Pool=2;PURPOSE=CDS;CNV_ID=FBXW7;CNV_HS=1
chr4	153249440	153249533	OCP1_FBXW7_8	.	GENE_ID=FBXW7;Pool=1;PURPOSE=CDS;CNV_ID=FBXW7;CNV_HS=1;TRIM_LEFT=6
chr4	153249528	153249646	OCP1_FBXW7_9	.	GENE_ID=FBXW7;Pool=2;PURPOSE=CDS;CNV_ID=FBXW7;CNV_HS=1
chr4	153250781	153250851	OCP1_FBXW7_10	.	GENE_ID=FBXW7;Pool=1;PURPOSE=CDS;CNV_ID=FBXW7;CNV_HS=1
chr4	153250852	153250926	CHP2_FBXW7_2	.	GENE_ID=FBXW7;Pool=2;PURPOSE=CDS;CNV_ID=FBXW7;CNV_HS=1
chr4	153250905	153250992	OCP1_FBXW7_11	.	GENE_ID=FBXW7;Pool=1;PURPOSE=CDS;CNV_ID=FBXW7;CNV_HS=1;TRIM_LEFT=4
chr4	153251854	153251941	OCP1_FBXW7_12	.	GENE_ID=FBXW7;Pool=2;PURPOSE=CDS;CNV_ID=FBXW7;CNV_HS=1
chr4	153251930	153252027	OCP1_FBXW7_13	.	GENE_ID=FBXW7;Pool=1;PURPOSE=CDS;CNV_ID=FBXW7;CNV_HS=1;TRIM_LEFT=2
chr4	153253720	153253839	OCP1_FBXW7_15	.	GENE_ID=FBXW7;Pool=2;PURPOSE=CDS;CNV_ID=FBXW7;CNV_HS=1
chr4	153253820	153253942	OCP1_FBXW7_16	.	GENE_ID=FBXW7;Pool=1;PURPOSE=CDS;CNV_ID=FBXW7;CNV_HS=1;TRIM_LEFT=6
chr4	153258942	153259051	OCP1_FBXW7_17	.	GENE_ID=FBXW7;Pool=2;PURPOSE=CDS;CNV_ID=FBXW7;CNV_HS=1
chr4	153268073	153268196	OCP1_FBXW7_18	.	GENE_ID=FBXW7;Pool=1;PURPOSE=CDS;CNV_ID=FBXW7;CNV_HS=1
chr4	153268191	153268306	FBXW7_1.32692	.	GENE_ID=FBXW7;Pool=2;PURPOSE=CDS;CNV_ID=FBXW7;CNV_HS=1
chr4	153271109	153271233	OCP1_FBXW7_20	.	GENE_ID=FBXW7;Pool=1;PURPOSE=CDS;CNV_ID=FBXW7;CNV_HS=1
chr4	153271224	153271311	OCP1_FBXW7_21	.	GENE_ID=FBXW7;Pool=2;PURPOSE=CDS;CNV_ID=FBXW7;CNV_HS=1;TRIM_LEFT=6
chr4	153273613	153273710	OCP1_FBXW7_22	.	GENE_ID=FBXW7;Pool=1;PURPOSE=CDS;CNV_ID=FBXW7;CNV_HS=1
chr4	153273693	153273789	OCP1_FBXW7_23	.	GENE_ID=FBXW7;Pool=2;PURPOSE=CDS;CNV_ID=FBXW7;CNV_HS=1;TRIM_LEFT=7
chr4	153273781	153273895	OCP1_FBXW7_24	.	GENE_ID=FBXW7;Pool=1;PURPOSE=CDS;CNV_ID=FBXW7;CNV_HS=1;TRIM_LEFT=4
chr4	153303311	153303405	OCP1_FBXW7_25	.	GENE_ID=FBXW7;Pool=2;PURPOSE=CDS;CNV_ID=FBXW7;CNV_HS=1
chr4	153303394	153303463	OCP1_FBXW7_26	.	GENE_ID=FBXW7;Pool=1;PURPOSE=CDS;CNV_ID=FBXW7;CNV_HS=1;TRIM_LEFT=8
chr4	153303452	153303528	OCP1_FBXW7_27	.	GENE_ID=FBXW7;Pool=2;PURPOSE=CDS;CNV_ID=FBXW7;CNV_HS=1;TRIM_LEFT=3
chr4	153332407	153332523	OCP1_FBXW7_28	.	GENE_ID=FBXW7;Pool=1;PURPOSE=CDS;CNV_ID=FBXW7;CNV_HS=1
chr4	153332512	153332626	OCP1_FBXW7_29	.	GENE_ID=FBXW7;Pool=2;PURPOSE=CDS;CNV_ID=FBXW7;CNV_HS=1;TRIM_LEFT=6
chr4	153332600	153332709	OCP1_FBXW7_30	.	GENE_ID=FBXW7;Pool=1;PURPOSE=CDS;CNV_ID=FBXW7;CNV_HS=1;TRIM_LEFT=8
chr4	153332688	153332773	OCP1_FBXW7_31	.	GENE_ID=FBXW7;Pool=2;PURPOSE=CDS;CNV_ID=FBXW7;CNV_HS=1;TRIM_LEFT=2
chr4	153332764	153332861	OCP1_FBXW7_32	.	GENE_ID=FBXW7;Pool=1;PURPOSE=CDS;CNV_ID=FBXW7;CNV_HS=1;TRIM_LEFT=5
chr4	153332860	153332940	OCP1_FBXW7_33	.	GENE_ID=FBXW7;Pool=2;PURPOSE=CDS;CNV_ID=FBXW7;CNV_HS=1
chr4	153332928	153333020	OCP1_FBXW7_34	.	GENE_ID=FBXW7;Pool=1;PURPOSE=CDS;CNV_ID=FBXW7;CNV_HS=1;TRIM_LEFT=8
chr5	1253819	1253954	TERT_1.43198	.	GENE_ID=TERT;Pool=1;PURPOSE=CNV,Hotspot;CNV_ID=TERT;CNV_HS=1
chr5	1255430	1255563	TERT_3.39317	.	GENE_ID=TERT;Pool=2;PURPOSE=CNV,Hotspot;CNV_ID=TERT;CNV_HS=1
chr5	1264503	1264604	TERT_6.49019	.	GENE_ID=TERT;Pool=1;PURPOSE=CNV,Hotspot;CNV_ID=TERT;CNV_HS=1
chr5	1268663	1268799	TERT_8.31512	.	GENE_ID=TERT;Pool=2;PURPOSE=CNV,Hotspot;CNV_ID=TERT;CNV_HS=1
chr5	1278755	1278890	TERT_11.34398	.	GENE_ID=TERT;Pool=1;PURPOSE=CNV,Hotspot;CNV_ID=TERT;CNV_HS=1
chr5	1280218	1280345	TERT_13.49540	.	GENE_ID=TERT;Pool=2;PURPOSE=CNV,Hotspot;CNV_ID=TERT;CNV_HS=1
chr5	1282558	1282655	TERT_14.65239	.	GENE_ID=TERT;Pool=1;PURPOSE=CNV,Hotspot;CNV_ID=TERT;CNV_HS=1
chr5	1293726	1293819	TERT_15.1.82829	.	GENE_ID=TERT;Pool=2;PURPOSE=CNV,Hotspot;CNV_ID=TERT;CNV_HS=1
chr5	1294072	1294201	TERT_15.1.57816	.	GENE_ID=TERT;Pool=1;PURPOSE=CNV,Hotspot;CNV_ID=TERT;CNV_HS=1
chr5	1294933	1295065	TERT_16.3565	.	GENE_ID=TERT;Pool=2;PURPOSE=CNV,Hotspot;CNV_ID=TERT;CNV_HS=1
chr5	1295053	1295193	TERT_1.2544	.	GENE_ID=TERT;Pool=1;PURPOSE=CNV,Hotspot;CNV_ID=TERT;CNV_HS=1;TRIM_LEFT=5
chr5	1295170	1295326	TERT_1.1986	.	GENE_ID=TERT;Pool=2;PURPOSE=CNV,Hotspot;CNV_ID=TERT;CNV_HS=1;TRIM_LEFT=7
chr5	38942341	38942464	RICTOR_1.37313	.	GENE_ID=RICTOR;Pool=1;PURPOSE=CNV;CNV_ID=RICTOR;CNV_HS=1
chr5	38944924	38945040	RICTOR_4.22183	.	GENE_ID=RICTOR;Pool=2;PURPOSE=CNV;CNV_ID=RICTOR;CNV_HS=1
chr5	38947432	38947536	RICTOR_7.11426	.	GENE_ID=RICTOR;Pool=1;PURPOSE=CNV;CNV_ID=RICTOR;CNV_HS=1
chr5	38950213	38950320	RICTOR_9.1.223330	.	GENE_ID=RICTOR;Pool=2;PURPOSE=CNV;CNV_ID=RICTOR;CNV_HS=1
chr5	38952368	38952484	RICTOR_10.66216	.	GENE_ID=RICTOR;Pool=1;PURPOSE=CNV;CNV_ID=RICTOR;CNV_HS=1
chr5	38955718	38955828	RICTOR_14.38079	.	GENE_ID=RICTOR;Pool=2;PURPOSE=CNV;CNV_ID=RICTOR;CNV_HS=1
chr5	38959877	38959959	RICTOR_19.29056	.	GENE_ID=RICTOR;Pool=1;PURPOSE=CNV;CNV_ID=RICTOR;CNV_HS=1
chr5	38964801	38964909	RICTOR_24.43137	.	GENE_ID=RICTOR;Pool=2;PURPOSE=CNV;CNV_ID=RICTOR;CNV_HS=1
chr5	38975556	38975656	RICTOR_30.5447	.	GENE_ID=RICTOR;Pool=1;PURPOSE=CNV;CNV_ID=RICTOR;CNV_HS=1
chr5	38991109	38991227	RICTOR_33.3962	.	GENE_ID=RICTOR;Pool=2;PURPOSE=CNV;CNV_ID=RICTOR;CNV_HS=1
chr5	67522497	67522593	OCP1_PIK3R1_1	.	GENE_ID=PIK3R1;Pool=1;PURPOSE=CDS;CNV_ID=PIK3R1;CNV_HS=1
chr5	67522582	67522674	OCP1_PIK3R1_2	.	GENE_ID=PIK3R1;Pool=2;PURPOSE=CDS;CNV_ID=PIK3R1;CNV_HS=1;TRIM_LEFT=2
chr5	67522673	67522791	OCP1_PIK3R1_3	.	GENE_ID=PIK3R1;Pool=1;PURPOSE=CDS;CNV_ID=PIK3R1;CNV_HS=1
chr5	67522763	67522851	OCP1_PIK3R1_4	.	GENE_ID=PIK3R1;Pool=2;PURPOSE=CDS;CNV_ID=PIK3R1;CNV_HS=1;TRIM_LEFT=4
chr5	67569169	67569270	OCP1_PIK3R1_5	.	GENE_ID=PIK3R1;Pool=1;PURPOSE=CDS;CNV_ID=PIK3R1;CNV_HS=1
chr5	67569228	67569321	OCP1_PIK3R1_6	.	GENE_ID=PIK3R1;Pool=2;PURPOSE=CDS;CNV_ID=PIK3R1;CNV_HS=1;TRIM_LEFT=5
chr5	67569743	67569820	OCP1_PIK3R1_7	.	GENE_ID=PIK3R1;Pool=1;PURPOSE=CDS;CNV_ID=PIK3R1;CNV_HS=1
chr5	67569806	67569894	OCP1_PIK3R1_8	.	GENE_ID=PIK3R1;Pool=2;PURPOSE=CDS;CNV_ID=PIK3R1;CNV_HS=1;TRIM_LEFT=6
chr5	67575382	67575481	OCP1_PIK3R1_9	.	GENE_ID=PIK3R1;Pool=1;PURPOSE=CDS;CNV_ID=PIK3R1;CNV_HS=1
chr5	67575470	67575571	OCP1_PIK3R1_10	.	GENE_ID=PIK3R1;Pool=2;PURPOSE=CDS;CNV_ID=PIK3R1;CNV_HS=1;TRIM_LEFT=5
chr5	67576325	67576398	PIK3R1_1.39371	.	GENE_ID=PIK3R1;Pool=1;PURPOSE=CDS;CNV_ID=PIK3R1;CNV_HS=1
chr5	67576372	67576491	OCP1_PIK3R1_12	.	GENE_ID=PIK3R1;Pool=2;PURPOSE=CDS;CNV_ID=PIK3R1;CNV_HS=1;TRIM_LEFT=8
chr5	67576480	67576563	OCP1_PIK3R1_13	.	GENE_ID=PIK3R1;Pool=1;PURPOSE=CDS;CNV_ID=PIK3R1;CNV_HS=1;TRIM_LEFT=4
chr5	67576728	67576839	OCP1_PIK3R1_14	.	GENE_ID=PIK3R1;Pool=2;PURPOSE=CDS;CNV_ID=PIK3R1;CNV_HS=1
chr5	67584545	67584626	OCP1_PIK3R1_15	.	GENE_ID=PIK3R1;Pool=1;PURPOSE=CDS;CNV_ID=PIK3R1;CNV_HS=1
chr5	67586515	67586604	OCP1_PIK3R1_16	.	GENE_ID=PIK3R1;Pool=2;PURPOSE=CDS;CNV_ID=PIK3R1;CNV_HS=1
chr5	67586593	67586678	OCP1_PIK3R1_17	.	GENE_ID=PIK3R1;Pool=1;PURPOSE=CDS;CNV_ID=PIK3R1;CNV_HS=1;TRIM_LEFT=9
chr5	67588061	67588160	OCP1_PIK3R1_18	.	GENE_ID=PIK3R1;Pool=2;PURPOSE=CDS;CNV_ID=PIK3R1;CNV_HS=1
chr5	67588145	67588243	OCP1_PIK3R1_19	.	GENE_ID=PIK3R1;Pool=1;PURPOSE=CDS;CNV_ID=PIK3R1;CNV_HS=1;TRIM_LEFT=3
chr5	67588903	67588974	OCP1_PIK3R1_20	.	GENE_ID=PIK3R1;Pool=2;PURPOSE=CDS;CNV_ID=PIK3R1;CNV_HS=1
chr5	67588963	67589035	OCP1_PIK3R1_21	.	GENE_ID=PIK3R1;Pool=1;PURPOSE=CDS;CNV_ID=PIK3R1;CNV_HS=1;TRIM_LEFT=6
chr5	67589094	67589201	OCP1_PIK3R1_22	.	GENE_ID=PIK3R1;Pool=2;PURPOSE=CDS;CNV_ID=PIK3R1;CNV_HS=1
chr5	67589187	67589288	OCP1_PIK3R1_23	.	GENE_ID=PIK3R1;Pool=1;PURPOSE=CDS;CNV_ID=PIK3R1;CNV_HS=1;TRIM_LEFT=5
chr5	67589277	67589379	OCP1_PIK3R1_24	.	GENE_ID=PIK3R1;Pool=2;PURPOSE=CDS;CNV_ID=PIK3R1;CNV_HS=1;TRIM_LEFT=5
chr5	67589413	67589548	PIK3R1_1.18395	.	GENE_ID=PIK3R1;Pool=1;PURPOSE=CDS;CNV_ID=PIK3R1;CNV_HS=1
chr5	67589555	67589656	OCP1_PIK3R1_26	.	GENE_ID=PIK3R1;Pool=2;PURPOSE=CDS;CNV_ID=PIK3R1;CNV_HS=1
chr5	67589657	67589741	OCP1_PIK3R1_27	.	GENE_ID=PIK3R1;Pool=1;PURPOSE=CDS;CNV_ID=PIK3R1;CNV_HS=1
chr5	67590315	67590405	OCP1_PIK3R1_28	.	GENE_ID=PIK3R1;Pool=2;PURPOSE=CDS;CNV_ID=PIK3R1;CNV_HS=1
chr5	67590394	67590477	OCP1_PIK3R1_29	.	GENE_ID=PIK3R1;Pool=1;PURPOSE=CDS;CNV_ID=PIK3R1;CNV_HS=1;TRIM_LEFT=6
chr5	67590466	67590558	OCP1_PIK3R1_30	.	GENE_ID=PIK3R1;Pool=2;PURPOSE=CDS;CNV_ID=PIK3R1;CNV_HS=1;TRIM_LEFT=5
chr5	67590947	67591036	OCP1_PIK3R1_31	.	GENE_ID=PIK3R1;Pool=1;PURPOSE=CDS;CNV_ID=PIK3R1;CNV_HS=1
chr5	67591025	67591102	OCP1_PIK3R1_32	.	GENE_ID=PIK3R1;Pool=2;PURPOSE=CDS;CNV_ID=PIK3R1;CNV_HS=1
chr5	67591091	67591187	OCP1_PIK3R1_33	.	GENE_ID=PIK3R1;Pool=1;PURPOSE=CDS;CNV_ID=PIK3R1;CNV_HS=1
chr5	67591238	67591329	OCP1_PIK3R1_34	.	GENE_ID=PIK3R1;Pool=2;PURPOSE=CDS;CNV_ID=PIK3R1;CNV_HS=1
chr5	67591992	67592073	OCP1_PIK3R1_35	.	GENE_ID=PIK3R1;Pool=1;PURPOSE=CDS;CNV_ID=PIK3R1;CNV_HS=1
chr5	67592062	67592177	OCP1_PIK3R1_36	.	GENE_ID=PIK3R1;Pool=2;PURPOSE=CDS;CNV_ID=PIK3R1;CNV_HS=1
chr5	67593213	67593304	OCP1_PIK3R1_37	.	GENE_ID=PIK3R1;Pool=1;PURPOSE=CDS;CNV_ID=PIK3R1;CNV_HS=1
chr5	67593293	67593373	OCP1_PIK3R1_38	.	GENE_ID=PIK3R1;Pool=2;PURPOSE=CDS;CNV_ID=PIK3R1;CNV_HS=1;TRIM_LEFT=5
chr5	67593354	67593436	OCP1_PIK3R1_39	.	GENE_ID=PIK3R1;Pool=1;PURPOSE=CDS;CNV_ID=PIK3R1;CNV_HS=1;TRIM_LEFT=4
chr5	131893011	131893137	RAD50_1.36842	.	GENE_ID=RAD50;Pool=2;PURPOSE=CDS;CNV_ID=RAD50;CNV_HS=1
chr5	131893125	131893201	RAD50_1.33240	.	GENE_ID=RAD50;Pool=1;PURPOSE=CDS;CNV_ID=RAD50;CNV_HS=1;TRIM_LEFT=5
chr5	131894951	131895058	RAD50_2.19348	.	GENE_ID=RAD50;Pool=2;PURPOSE=CDS;CNV_ID=RAD50;CNV_HS=1
chr5	131911422	131911535	RAD50_3.68446	.	GENE_ID=RAD50;Pool=1;PURPOSE=CDS;CNV_ID=RAD50;CNV_HS=1
chr5	131911473	131911594	RAD50_3.77002	.	GENE_ID=RAD50;Pool=2;PURPOSE=CDS;CNV_ID=RAD50;CNV_HS=1;TRIM_LEFT=5
chr5	131911580	131911658	RAD50_3.27254	.	GENE_ID=RAD50;Pool=1;PURPOSE=CDS;CNV_ID=RAD50;CNV_HS=1;TRIM_LEFT=6
chr5	131914902	131915028	RAD50_4.30384	.	GENE_ID=RAD50;Pool=2;PURPOSE=CDS;CNV_ID=RAD50;CNV_HS=1
chr5	131915014	131915129	RAD50_4.109238	.	GENE_ID=RAD50;Pool=1;PURPOSE=CDS;CNV_ID=RAD50;CNV_HS=1;TRIM_LEFT=7
chr5	131915114	131915184	RAD50_4.65903	.	GENE_ID=RAD50;Pool=2;PURPOSE=CDS;CNV_ID=RAD50;CNV_HS=1;TRIM_LEFT=6
chr5	131915171	131915246	RAD50_4.19141	.	GENE_ID=RAD50;Pool=1;PURPOSE=CDS;CNV_ID=RAD50;CNV_HS=1;TRIM_LEFT=8
chr5	131915548	131915676	RAD50_5.87593	.	GENE_ID=RAD50;Pool=2;PURPOSE=CDS;CNV_ID=RAD50;CNV_HS=1
chr5	131915617	131915733	RAD50_5.72722	.	GENE_ID=RAD50;Pool=1;PURPOSE=CDS;CNV_ID=RAD50;CNV_HS=1;TRIM_LEFT=4
chr5	131915720	131915837	RAD50_1.10381	.	GENE_ID=RAD50;Pool=2;PURPOSE=CDS;CNV_ID=RAD50;CNV_HS=1;TRIM_LEFT=3
chr5	131923190	131923297	RAD50_6.28539	.	GENE_ID=RAD50;Pool=1;PURPOSE=CDS;CNV_ID=RAD50;CNV_HS=1
chr5	131923286	131923397	RAD50_6.50403	.	GENE_ID=RAD50;Pool=2;PURPOSE=CDS;CNV_ID=RAD50;CNV_HS=1;TRIM_LEFT=9
chr5	131923583	131923653	RAD50_7.13075	.	GENE_ID=RAD50;Pool=1;PURPOSE=CDS;CNV_ID=RAD50;CNV_HS=1
chr5	131923637	131923767	RAD50_7.55882	.	GENE_ID=RAD50;Pool=2;PURPOSE=CDS;CNV_ID=RAD50;CNV_HS=1;TRIM_LEFT=3
chr5	131923767	131923839	RAD50_7.48537	.	GENE_ID=RAD50;Pool=1;PURPOSE=CDS;CNV_ID=RAD50;CNV_HS=1
chr5	131924340	131924467	RAD50_8.104921	.	GENE_ID=RAD50;Pool=2;PURPOSE=CDS;CNV_ID=RAD50;CNV_HS=1
chr5	131924445	131924517	RAD50_8.97825	.	GENE_ID=RAD50;Pool=1;PURPOSE=CDS;CNV_ID=RAD50;CNV_HS=1;TRIM_LEFT=6
chr5	131924496	131924596	RAD50_8.22602	.	GENE_ID=RAD50;Pool=2;PURPOSE=CDS;CNV_ID=RAD50;CNV_HS=1;TRIM_LEFT=3
chr5	131925262	131925383	RAD50_2.16193	.	GENE_ID=RAD50;Pool=1;PURPOSE=CDS;CNV_ID=RAD50;CNV_HS=1
chr5	131925345	131925468	RAD50_9.29639	.	GENE_ID=RAD50;Pool=2;PURPOSE=CDS;CNV_ID=RAD50;CNV_HS=1;TRIM_LEFT=4
chr5	131925444	131925509	RAD50_9.2726	.	GENE_ID=RAD50;Pool=1;PURPOSE=CDS;CNV_ID=RAD50;CNV_HS=1
chr5	131925507	131925626	RAD50_3.1836.1	.	GENE_ID=RAD50;Pool=2;PURPOSE=CDS;CNV_ID=RAD50;CNV_HS=1
chr5	131926913	131927016	RAD50_10.12985	.	GENE_ID=RAD50;Pool=1;PURPOSE=CDS;CNV_ID=RAD50;CNV_HS=1
chr5	131927012	131927081	RAD50_10.37719	.	GENE_ID=RAD50;Pool=2;PURPOSE=CDS;CNV_ID=RAD50;CNV_HS=1
chr5	131927056	131927128	RAD50_10.72342	.	GENE_ID=RAD50;Pool=1;PURPOSE=CDS;CNV_ID=RAD50;CNV_HS=1;TRIM_LEFT=10
chr5	131927498	131927599	RAD50_11.30060	.	GENE_ID=RAD50;Pool=2;PURPOSE=CDS;CNV_ID=RAD50;CNV_HS=1
chr5	131927592	131927723	RAD50_11.32626	.	GENE_ID=RAD50;Pool=1;PURPOSE=CDS;CNV_ID=RAD50;CNV_HS=1
chr5	131927685	131927752	RAD50_11.25986	.	GENE_ID=RAD50;Pool=2;PURPOSE=CDS;CNV_ID=RAD50;CNV_HS=1;TRIM_LEFT=4
chr5	131930513	131930631	RAD50_12.55967	.	GENE_ID=RAD50;Pool=1;PURPOSE=CDS;CNV_ID=RAD50;CNV_HS=1
chr5	131930591	131930673	RAD50_12.72098	.	GENE_ID=RAD50;Pool=2;PURPOSE=CDS;CNV_ID=RAD50;CNV_HS=1;TRIM_LEFT=3
chr5	131930672	131930787	RAD50_12.42013	.	GENE_ID=RAD50;Pool=1;PURPOSE=CDS;CNV_ID=RAD50;CNV_HS=1
chr5	131931225	131931343	RAD50_13.11423	.	GENE_ID=RAD50;Pool=2;PURPOSE=CDS;CNV_ID=RAD50;CNV_HS=1
chr5	131931338	131931412	RAD50_13.12417	.	GENE_ID=RAD50;Pool=1;PURPOSE=CDS;CNV_ID=RAD50;CNV_HS=1
chr5	131931384	131931509	RAD50_13.19867	.	GENE_ID=RAD50;Pool=2;PURPOSE=CDS;CNV_ID=RAD50;CNV_HS=1;TRIM_LEFT=7
chr5	131938961	131939052	RAD50_14.80397	.	GENE_ID=RAD50;Pool=1;PURPOSE=CDS;CNV_ID=RAD50;CNV_HS=1
chr5	131939020	131939090	RAD50_14.55515	.	GENE_ID=RAD50;Pool=2;PURPOSE=CDS;CNV_ID=RAD50;CNV_HS=1;TRIM_LEFT=4
chr5	131939090	131939199	RAD50_14.38719	.	GENE_ID=RAD50;Pool=1;PURPOSE=CDS;CNV_ID=RAD50;CNV_HS=1
chr5	131939599	131939717	RAD50_15.44646	.	GENE_ID=RAD50;Pool=2;PURPOSE=CDS;CNV_ID=RAD50;CNV_HS=1
chr5	131939697	131939771	RAD50_15.41904	.	GENE_ID=RAD50;Pool=1;PURPOSE=CDS;CNV_ID=RAD50;CNV_HS=1;TRIM_LEFT=6
chr5	131940436	131940523	RAD50_16.80720	.	GENE_ID=RAD50;Pool=2;PURPOSE=CDS;CNV_ID=RAD50;CNV_HS=1
chr5	131940523	131940594	RAD50_16.89392	.	GENE_ID=RAD50;Pool=1;PURPOSE=CDS;CNV_ID=RAD50;CNV_HS=1
chr5	131940560	131940677	RAD50_16.41837	.	GENE_ID=RAD50;Pool=2;PURPOSE=CDS;CNV_ID=RAD50;CNV_HS=1;TRIM_LEFT=7
chr5	131944270	131944339	RAD50_17.11634	.	GENE_ID=RAD50;Pool=1;PURPOSE=CDS;CNV_ID=RAD50;CNV_HS=1
chr5	131944332	131944457	RAD50_17.33666	.	GENE_ID=RAD50;Pool=2;PURPOSE=CDS;CNV_ID=RAD50;CNV_HS=1
chr5	131944789	131944879	RAD50_18.21157	.	GENE_ID=RAD50;Pool=1;PURPOSE=CDS;CNV_ID=RAD50;CNV_HS=1
chr5	131944870	131944991	RAD50_18.10693	.	GENE_ID=RAD50;Pool=2;PURPOSE=CDS;CNV_ID=RAD50;CNV_HS=1;TRIM_LEFT=5
chr5	131945012	131945093	RAD50_19.9764	.	GENE_ID=RAD50;Pool=1;PURPOSE=CDS;CNV_ID=RAD50;CNV_HS=1
chr5	131951670	131951786	RAD50_20.16781	.	GENE_ID=RAD50;Pool=2;PURPOSE=CDS;CNV_ID=RAD50;CNV_HS=1
chr5	131951774	131951854	RAD50_20.43792	.	GENE_ID=RAD50;Pool=1;PURPOSE=CDS;CNV_ID=RAD50;CNV_HS=1;TRIM_LEFT=7
chr5	131953724	131953820	RAD50_21.46100	.	GENE_ID=RAD50;Pool=2;PURPOSE=CDS;CNV_ID=RAD50;CNV_HS=1
chr5	131953794	131953884	RAD50_21.27809	.	GENE_ID=RAD50;Pool=1;PURPOSE=CDS;CNV_ID=RAD50;CNV_HS=1;TRIM_LEFT=9
chr5	131953883	131953992	RAD50_21.81707	.	GENE_ID=RAD50;Pool=2;PURPOSE=CDS;CNV_ID=RAD50;CNV_HS=1
chr5	131972804	131972925	RAD50_22.9476	.	GENE_ID=RAD50;Pool=1;PURPOSE=CDS;CNV_ID=RAD50;CNV_HS=1
chr5	131973753	131973824	RAD50_23.90345	.	GENE_ID=RAD50;Pool=2;PURPOSE=CDS;CNV_ID=RAD50;CNV_HS=1
chr5	131973823	131973940	RAD50_23.81632	.	GENE_ID=RAD50;Pool=1;PURPOSE=CDS;CNV_ID=RAD50;CNV_HS=1
chr5	131976307	131976434	RAD50_24.1530	.	GENE_ID=RAD50;Pool=2;PURPOSE=CDS;CNV_ID=RAD50;CNV_HS=1
chr5	131976380	131976499	RAD50_24.126699	.	GENE_ID=RAD50;Pool=1;PURPOSE=CDS;CNV_ID=RAD50;CNV_HS=1;TRIM_LEFT=5
chr5	131976489	131976560	RAD50_24.59594	.	GENE_ID=RAD50;Pool=2;PURPOSE=CDS;CNV_ID=RAD50;CNV_HS=1;TRIM_LEFT=5
chr5	131977815	131977918	RAD50_25.28204	.	GENE_ID=RAD50;Pool=1;PURPOSE=CDS;CNV_ID=RAD50;CNV_HS=1
chr5	131977894	131977976	RAD50_25.64962	.	GENE_ID=RAD50;Pool=2;PURPOSE=CDS;CNV_ID=RAD50;CNV_HS=1;TRIM_LEFT=6
chr5	131977959	131978069	RAD50_25.71411	.	GENE_ID=RAD50;Pool=1;PURPOSE=CDS;CNV_ID=RAD50;CNV_HS=1;TRIM_LEFT=8
chr5	149433533	149433662	SP_166.19353	.	GENE_ID=CSF1R;Pool=2;PURPOSE=Hotspot;CNV_ID=CSF1R;CNV_HS=0
chr5	149447744	149447854	SP_167.23039	.	GENE_ID=CSF1R;Pool=1;PURPOSE=Hotspot;CNV_ID=CSF1R;CNV_HS=0
chr5	149452991	149453117	SP_168.49839	.	GENE_ID=CSF1R;Pool=2;PURPOSE=Hotspot;CNV_ID=CSF1R;CNV_HS=0
chr5	149495234	149495370	PDGFRB_1.1684	.	GENE_ID=PDGFRB;Pool=1;PURPOSE=CNV,Hotspot;CNV_ID=PDGFRB;CNV_HS=1
chr5	149497292	149497426	PDGFRB_2.78563	.	GENE_ID=PDGFRB;Pool=2;PURPOSE=CNV,Hotspot;CNV_ID=PDGFRB;CNV_HS=1
chr5	149499533	149499632	PDGFRB_5.29534	.	GENE_ID=PDGFRB;Pool=1;PURPOSE=CNV,Hotspot;CNV_ID=PDGFRB;CNV_HS=1
chr5	149501441	149501529	PDGFRB_8.78631	.	GENE_ID=PDGFRB;Pool=2;PURPOSE=CNV,Hotspot;CNV_ID=PDGFRB;CNV_HS=1
chr5	149504273	149504410	PDGFRB_11.47837	.	GENE_ID=PDGFRB;Pool=1;PURPOSE=CNV,Hotspot;CNV_ID=PDGFRB;CNV_HS=1
chr5	149504885	149505054	SP_169.70307	.	GENE_ID=PDGFRB;Pool=2;PURPOSE=CNV,Hotspot;CNV_ID=PDGFRB;CNV_HS=1
chr5	149506122	149506236	PDGFRB_13.22777	.	GENE_ID=PDGFRB;Pool=1;PURPOSE=CNV,Hotspot;CNV_ID=PDGFRB;CNV_HS=1
chr5	149509997	149510119	PDGFRB_15.68599	.	GENE_ID=PDGFRB;Pool=2;PURPOSE=CNV,Hotspot;CNV_ID=PDGFRB;CNV_HS=1
chr5	149512330	149512442	PDGFRB_17.39878	.	GENE_ID=PDGFRB;Pool=1;PURPOSE=CNV,Hotspot;CNV_ID=PDGFRB;CNV_HS=1
chr5	149513499	149513579	PDGFRB_19.7162	.	GENE_ID=PDGFRB;Pool=2;PURPOSE=CNV,Hotspot;CNV_ID=PDGFRB;CNV_HS=1
chr5	149515059	149515186	PDGFRB_21.64002	.	GENE_ID=PDGFRB;Pool=1;PURPOSE=CNV,Hotspot;CNV_ID=PDGFRB;CNV_HS=1
chr5	149516567	149516659	PDGFRB_22.51266	.	GENE_ID=PDGFRB;Pool=2;PURPOSE=CNV,Hotspot;CNV_ID=PDGFRB;CNV_HS=1
chr5	176516567	176516695	FGFR4_1.58557	.	GENE_ID=FGFR4;Pool=1;PURPOSE=CNV,Hotspot;CNV_ID=FGFR4;CNV_HS=1
chr5	176517514	176517647	FGFR4_2.71625	.	GENE_ID=FGFR4;Pool=2;PURPOSE=CNV,Hotspot;CNV_ID=FGFR4;CNV_HS=1
chr5	176517989	176518098	FGFR4_4.14599	.	GENE_ID=FGFR4;Pool=1;PURPOSE=CNV,Hotspot;CNV_ID=FGFR4;CNV_HS=1
chr5	176519308	176519442	FGFR4_6.43847	.	GENE_ID=FGFR4;Pool=2;PURPOSE=CNV,Hotspot;CNV_ID=FGFR4;CNV_HS=1
chr5	176520114	176520249	FGFR4_8.1420	.	GENE_ID=FGFR4;Pool=1;PURPOSE=CNV,Hotspot;CNV_ID=FGFR4;CNV_HS=1
chr5	176520352	176520450	FGFR4_8.27575	.	GENE_ID=FGFR4;Pool=2;PURPOSE=CNV,Hotspot;CNV_ID=FGFR4;CNV_HS=1
chr5	176522242	176522375	FGFR4_11.25088	.	GENE_ID=FGFR4;Pool=1;PURPOSE=CNV,Hotspot;CNV_ID=FGFR4;CNV_HS=1
chr5	176522341	176522475	SP_170.27557	.	GENE_ID=FGFR4;Pool=2;PURPOSE=CNV,Hotspot;CNV_ID=FGFR4;CNV_HS=1;TRIM_LEFT=6
chr5	176522491	176522626	SP_170.13757	.	GENE_ID=FGFR4;Pool=1;PURPOSE=CNV,Hotspot;CNV_ID=FGFR4;CNV_HS=1
chr5	176523268	176523400	FGFR4_14.11901	.	GENE_ID=FGFR4;Pool=2;PURPOSE=CNV,Hotspot;CNV_ID=FGFR4;CNV_HS=1
chr5	176524308	176524448	FGFR4_16.6404	.	GENE_ID=FGFR4;Pool=1;PURPOSE=CNV,Hotspot;CNV_ID=FGFR4;CNV_HS=1
chr6	26031985	26032107	SP_171.79050	.	GENE_ID=HIST1H3B;Pool=1;PURPOSE=Hotspot;CNV_ID=HIST1H3B;CNV_HS=0
chr6	26032180	26032273	SP_171.50792	.	GENE_ID=HIST1H3B;Pool=2;PURPOSE=Hotspot;CNV_ID=HIST1H3B;CNV_HS=0
chr6	41903565	41903686	CCND3_1.4093	.	GENE_ID=CCND3;Pool=1;PURPOSE=CNV;CNV_ID=CCND3;CNV_HS=1
chr6	41903680	41903809	CCND3_1.37478	.	GENE_ID=CCND3;Pool=2;PURPOSE=CNV;CNV_ID=CCND3;CNV_HS=1
chr6	41904272	41904398	CCND3_2.17155	.	GENE_ID=CCND3;Pool=1;PURPOSE=CNV;CNV_ID=CCND3;CNV_HS=1
chr6	41904315	41904444	CCND3_1.17330	.	GENE_ID=CCND3;Pool=2;PURPOSE=CNV;CNV_ID=CCND3;CNV_HS=1;TRIM_LEFT=3
chr6	41905009	41905131	CCND3_3.43591	.	GENE_ID=CCND3;Pool=1;PURPOSE=CNV;CNV_ID=CCND3;CNV_HS=1
chr6	41905078	41905194	CCND3_3.95149	.	GENE_ID=CCND3;Pool=2;PURPOSE=CNV;CNV_ID=CCND3;CNV_HS=1;TRIM_LEFT=8
chr6	41908157	41908289	CCND3_4.62789	.	GENE_ID=CCND3;Pool=1;PURPOSE=CNV;CNV_ID=CCND3;CNV_HS=1
chr6	41908188	41908329	CCND3_4.63754	.	GENE_ID=CCND3;Pool=2;PURPOSE=CNV;CNV_ID=CCND3;CNV_HS=1;TRIM_LEFT=6
chr6	41909093	41909230	CCND3_6.3942	.	GENE_ID=CCND3;Pool=1;PURPOSE=CNV;CNV_ID=CCND3;CNV_HS=1
chr6	41909230	41909369	CCND3_6.20467	.	GENE_ID=CCND3;Pool=2;PURPOSE=CNV;CNV_ID=CCND3;CNV_HS=1
chr6	117622075	117622150	ROS1_1.44175	.	GENE_ID=ROS1;Pool=1;PURPOSE=Hotspot;CNV_ID=ROS1;CNV_HS=0
chr6	117622143	117622264	ROS1_1.56528	.	GENE_ID=ROS1;Pool=2;PURPOSE=Hotspot;CNV_ID=ROS1;CNV_HS=0
chr6	117622263	117622345	ROS1_1.86711	.	GENE_ID=ROS1;Pool=1;PURPOSE=Hotspot;CNV_ID=ROS1;CNV_HS=0
chr6	117629927	117629997	ROS1_2.82871	.	GENE_ID=ROS1;Pool=2;PURPOSE=Hotspot;CNV_ID=ROS1;CNV_HS=0
chr6	117629979	117630088	ROS1_2.42826	.	GENE_ID=ROS1;Pool=1;PURPOSE=Hotspot;CNV_ID=ROS1;CNV_HS=0;TRIM_LEFT=4
chr6	117630079	117630148	ROS1_2.11480	.	GENE_ID=ROS1;Pool=2;PURPOSE=Hotspot;CNV_ID=ROS1;CNV_HS=0;TRIM_LEFT=6
chr6	117631242	117631362	ROS1_3.72444	.	GENE_ID=ROS1;Pool=1;PURPOSE=Hotspot;CNV_ID=ROS1;CNV_HS=0
chr6	117631299	117631404	ROS1_3.42144	.	GENE_ID=ROS1;Pool=2;PURPOSE=Hotspot;CNV_ID=ROS1;CNV_HS=0;TRIM_LEFT=6
chr6	117631403	117631488	ROS1_3.103734	.	GENE_ID=ROS1;Pool=1;PURPOSE=Hotspot;CNV_ID=ROS1;CNV_HS=0
chr6	117632180	117632268	ROS1_4.3171	.	GENE_ID=ROS1;Pool=2;PURPOSE=Hotspot;CNV_ID=ROS1;CNV_HS=0
chr6	117632238	117632354	SP_173.5152	.	GENE_ID=ROS1;Pool=1;PURPOSE=Hotspot;CNV_ID=ROS1;CNV_HS=0;TRIM_LEFT=5
chr6	117638301	117638420	SP_174.49449	.	GENE_ID=ROS1;Pool=2;PURPOSE=Hotspot;CNV_ID=ROS1;CNV_HS=0
chr6	117638417	117638491	ROS1_5.35691	.	GENE_ID=ROS1;Pool=1;PURPOSE=Hotspot;CNV_ID=ROS1;CNV_HS=0
chr6	117639334	117639428	ROS1_6.1300	.	GENE_ID=ROS1;Pool=2;PURPOSE=Hotspot;CNV_ID=ROS1;CNV_HS=0
chr6	117640996	117641066	ROS1_7.39363	.	GENE_ID=ROS1;Pool=1;PURPOSE=Hotspot;CNV_ID=ROS1;CNV_HS=0
chr6	117641057	117641179	ROS1_7.105948	.	GENE_ID=ROS1;Pool=2;PURPOSE=Hotspot;CNV_ID=ROS1;CNV_HS=0;TRIM_LEFT=6
chr6	117641174	117641246	ROS1_7.66764	.	GENE_ID=ROS1;Pool=1;PURPOSE=Hotspot;CNV_ID=ROS1;CNV_HS=0
chr6	152129032	152129171	ESR1_1.11771	.	GENE_ID=ESR1;Pool=2;PURPOSE=CNV,Hotspot;CNV_ID=ESR1;CNV_HS=1
chr6	152129204	152129343	ESR1_1.10929	.	GENE_ID=ESR1;Pool=1;PURPOSE=CNV,Hotspot;CNV_ID=ESR1;CNV_HS=1
chr6	152163830	152163936	ESR1_2.7644	.	GENE_ID=ESR1;Pool=2;PURPOSE=CNV,Hotspot;CNV_ID=ESR1;CNV_HS=1
chr6	152201840	152201964	ESR1_3.7855	.	GENE_ID=ESR1;Pool=1;PURPOSE=CNV,Hotspot;CNV_ID=ESR1;CNV_HS=1
chr6	152265351	152265448	ESR1_4.30071	.	GENE_ID=ESR1;Pool=2;PURPOSE=CNV,Hotspot;CNV_ID=ESR1;CNV_HS=1
chr6	152265444	152265566	SP_176.7914	.	GENE_ID=ESR1;Pool=1;PURPOSE=CNV,Hotspot;CNV_ID=ESR1;CNV_HS=1
chr6	152332793	152332911	SP_177.37774	.	GENE_ID=ESR1;Pool=2;PURPOSE=CNV,Hotspot;CNV_ID=ESR1;CNV_HS=1
chr6	152332872	152333001	ESR1_5.21678	.	GENE_ID=ESR1;Pool=1;PURPOSE=CNV,Hotspot;CNV_ID=ESR1;CNV_HS=1;TRIM_LEFT=5
chr6	152415486	152415595	SP_178.38569	.	GENE_ID=ESR1;Pool=2;PURPOSE=CNV,Hotspot;CNV_ID=ESR1;CNV_HS=1
chr6	152415593	152415718	ESR1_7.115334	.	GENE_ID=ESR1;Pool=1;PURPOSE=CNV,Hotspot;CNV_ID=ESR1;CNV_HS=1
chr6	152419909	152420035	SP_179.29766	.	GENE_ID=ESR1;Pool=2;PURPOSE=CNV,Hotspot;CNV_ID=ESR1;CNV_HS=1
chr7	6012922	6013056	PMS2_1.60634	.	GENE_ID=PMS2;Pool=1;PURPOSE=CDS;CNV_ID=PMS2;CNV_HS=1
chr7	6018324	6018460	PMS2_3.9528	.	GENE_ID=PMS2;Pool=2;PURPOSE=CDS;CNV_ID=PMS2;CNV_HS=1
chr7	6022346	6022483	PMS2_4.88111	.	GENE_ID=PMS2;Pool=1;PURPOSE=CDS;CNV_ID=PMS2;CNV_HS=1
chr7	6022589	6022712	PMS2_4.64391	.	GENE_ID=PMS2;Pool=2;PURPOSE=CDS;CNV_ID=PMS2;CNV_HS=1
chr7	6026425	6026566	PMS2_5.54896	.	GENE_ID=PMS2;Pool=1;PURPOSE=CDS;CNV_ID=PMS2;CNV_HS=1
chr7	6026529	6026607	PMS2_5.236496	.	GENE_ID=PMS2;Pool=2;PURPOSE=CDS;CNV_ID=PMS2;CNV_HS=1
chr7	6026602	6026731	PMS2_5.106033	.	GENE_ID=PMS2;Pool=1;PURPOSE=CDS;CNV_ID=PMS2;CNV_HS=1
chr7	6026702	6026789	PMS2_5.113266	.	GENE_ID=PMS2;Pool=2;PURPOSE=CDS;CNV_ID=PMS2;CNV_HS=1;TRIM_LEFT=4
chr7	6026768	6026911	PMS2_5.50977	.	GENE_ID=PMS2;Pool=1;PURPOSE=CDS;CNV_ID=PMS2;CNV_HS=1;TRIM_LEFT=8
chr7	6026902	6026988	PMS2_5.97909	.	GENE_ID=PMS2;Pool=2;PURPOSE=CDS;CNV_ID=PMS2;CNV_HS=1;TRIM_LEFT=6
chr7	6026939	6027077	PMS2_5.279264	.	GENE_ID=PMS2;Pool=1;PURPOSE=CDS;CNV_ID=PMS2;CNV_HS=1;TRIM_LEFT=3
chr7	6027029	6027116	PMS2_5.41218	.	GENE_ID=PMS2;Pool=2;PURPOSE=CDS;CNV_ID=PMS2;CNV_HS=1;TRIM_LEFT=5
chr7	6027116	6027250	PMS2_5.226052	.	GENE_ID=PMS2;Pool=1;PURPOSE=CDS;CNV_ID=PMS2;CNV_HS=1
chr7	6027151	6027260	PMS2_5.280413	.	GENE_ID=PMS2;Pool=2;PURPOSE=CDS;CNV_ID=PMS2;CNV_HS=1;TRIM_LEFT=3
chr7	6029421	6029513	PMS2_6.30106	.	GENE_ID=PMS2;Pool=1;PURPOSE=CDS;CNV_ID=PMS2;CNV_HS=1
chr7	6029495	6029566	PMS2_6.55339	.	GENE_ID=PMS2;Pool=2;PURPOSE=CDS;CNV_ID=PMS2;CNV_HS=1;TRIM_LEFT=10
chr7	6029553	6029638	PMS2_6.56852	.	GENE_ID=PMS2;Pool=1;PURPOSE=CDS;CNV_ID=PMS2;CNV_HS=1;TRIM_LEFT=5
chr7	6031589	6031704	PMS2_7.55316	.	GENE_ID=PMS2;Pool=2;PURPOSE=CDS;CNV_ID=PMS2;CNV_HS=1
chr7	6035149	6035266	PMS2_8.80679	.	GENE_ID=PMS2;Pool=1;PURPOSE=CDS;CNV_ID=PMS2;CNV_HS=1
chr7	6035232	6035306	PMS2_8.60484	.	GENE_ID=PMS2;Pool=2;PURPOSE=CDS;CNV_ID=PMS2;CNV_HS=1;TRIM_LEFT=2
chr7	6036943	6037037	PMS2_1.5013	.	GENE_ID=PMS2;Pool=1;PURPOSE=CDS;CNV_ID=PMS2;CNV_HS=1
chr7	6036956	6037075	PMS2_1.20311	.	GENE_ID=PMS2;Pool=2;PURPOSE=CDS;CNV_ID=PMS2;CNV_HS=1;TRIM_LEFT=8
chr7	6038702	6038811	PMS2_10.34189	.	GENE_ID=PMS2;Pool=1;PURPOSE=CDS;CNV_ID=PMS2;CNV_HS=1
chr7	6038781	6038863	PMS2_10.39085	.	GENE_ID=PMS2;Pool=2;PURPOSE=CDS;CNV_ID=PMS2;CNV_HS=1;TRIM_LEFT=4
chr7	6038853	6038953	PMS2_10.30580	.	GENE_ID=PMS2;Pool=1;PURPOSE=CDS;CNV_ID=PMS2;CNV_HS=1;TRIM_LEFT=8
chr7	6042126	6042266	PMS2_11.40576	.	GENE_ID=PMS2;Pool=2;PURPOSE=CDS;CNV_ID=PMS2;CNV_HS=1
chr7	6042219	6042295	PMS2_11.112574	.	GENE_ID=PMS2;Pool=1;PURPOSE=CDS;CNV_ID=PMS2;CNV_HS=1
chr7	6043282	6043352	PMS2_12.9388	.	GENE_ID=PMS2;Pool=2;PURPOSE=CDS;CNV_ID=PMS2;CNV_HS=1
chr7	6043335	6043455	PMS2_12.73413	.	GENE_ID=PMS2;Pool=1;PURPOSE=CDS;CNV_ID=PMS2;CNV_HS=1
chr7	6043556	6043657	PMS2_13.14107	.	GENE_ID=PMS2;Pool=2;PURPOSE=CDS;CNV_ID=PMS2;CNV_HS=1
chr7	6043609	6043709	PMS2_13.9320	.	GENE_ID=PMS2;Pool=1;PURPOSE=CDS;CNV_ID=PMS2;CNV_HS=1;TRIM_LEFT=3
chr7	6045479	6045583	PMS2_14.66575	.	GENE_ID=PMS2;Pool=2;PURPOSE=CDS;CNV_ID=PMS2;CNV_HS=1
chr7	6045597	6045726	PMS2_14.57547	.	GENE_ID=PMS2;Pool=1;PURPOSE=CDS;CNV_ID=PMS2;CNV_HS=1
chr7	6048582	6048676	PMS2_15.17530	.	GENE_ID=PMS2;Pool=2;PURPOSE=CDS;CNV_ID=PMS2;CNV_HS=1
chr7	6426861	6426973	SP_180.30055	.	GENE_ID=RAC1;Pool=1;PURPOSE=Hotspot;CNV_ID=RAC1;CNV_HS=0
chr7	55211009	55211132	SP_181.46974	.	GENE_ID=EGFR;Pool=2;PURPOSE=CNV,Hotspot;CNV_ID=EGFR;CNV_HS=1
chr7	55221797	55221919	SP_182.4538	.	GENE_ID=EGFR;Pool=1;PURPOSE=CNV,Hotspot;CNV_ID=EGFR;CNV_HS=1
chr7	55227887	55228014	SP_183.8956	.	GENE_ID=EGFR;Pool=2;PURPOSE=CNV,Hotspot;CNV_ID=EGFR;CNV_HS=1
chr7	55232995	55233125	SP_184.28958	.	GENE_ID=EGFR;Pool=1;PURPOSE=CNV,Hotspot;CNV_ID=EGFR;CNV_HS=1
chr7	55241606	55241732	EGFR_1.33542	.	GENE_ID=EGFR;Pool=2;PURPOSE=CNV,Hotspot;CNV_ID=EGFR;CNV_HS=1
chr7	55241706	55241800	EGFR_1.7796	.	GENE_ID=EGFR;Pool=1;PURPOSE=CNV,Hotspot;CNV_ID=EGFR;CNV_HS=1;TRIM_LEFT=3
chr7	55242409	55242510	EGFR_2.29801	.	GENE_ID=EGFR;Pool=2;PURPOSE=CNV,Hotspot;CNV_ID=EGFR;CNV_HS=1
chr7	55242479	55242555	EGFR_2.43553	.	GENE_ID=EGFR;Pool=1;PURPOSE=CNV,Hotspot;CNV_ID=EGFR;CNV_HS=1;TRIM_LEFT=3
chr7	55248973	55249104	SP_187.44764	.	GENE_ID=EGFR;Pool=2;PURPOSE=CNV,Hotspot;CNV_ID=EGFR;CNV_HS=1
chr7	55249122	55249245	CHP2_EGFR_7	.	GENE_ID=EGFR;Pool=1;PURPOSE=CNV,Hotspot;CNV_ID=EGFR;CNV_HS=1
chr7	55259383	55259462	EGFR_4.70754	.	GENE_ID=EGFR;Pool=2;PURPOSE=CNV,Hotspot;CNV_ID=EGFR;CNV_HS=1
chr7	55259416	55259545	EGFR_4.93899	.	GENE_ID=EGFR;Pool=1;PURPOSE=CNV,Hotspot;CNV_ID=EGFR;CNV_HS=1;TRIM_LEFT=9
chr7	55259508	55259622	EGFR_4.50510	.	GENE_ID=EGFR;Pool=2;PURPOSE=CNV,Hotspot;CNV_ID=EGFR;CNV_HS=1;TRIM_LEFT=6
chr7	55260433	55260545	EGFR_5.14422	.	GENE_ID=EGFR;Pool=1;PURPOSE=CNV,Hotspot;CNV_ID=EGFR;CNV_HS=1
chr7	55266408	55266530	EGFR_6.59304	.	GENE_ID=EGFR;Pool=2;PURPOSE=CNV,Hotspot;CNV_ID=EGFR;CNV_HS=1
chr7	55266530	55266650	EGFR_6.66018	.	GENE_ID=EGFR;Pool=1;PURPOSE=CNV,Hotspot;CNV_ID=EGFR;CNV_HS=1
chr7	55267990	55268091	EGFR_7.67668	.	GENE_ID=EGFR;Pool=2;PURPOSE=CNV,Hotspot;CNV_ID=EGFR;CNV_HS=1
chr7	92244371	92244492	CDK6_1.31886	.	GENE_ID=CDK6;Pool=1;PURPOSE=CNV,Hotspot;CNV_ID=CDK6;CNV_HS=1
chr7	92244574	92244696	CDK6_1.14388	.	GENE_ID=CDK6;Pool=2;PURPOSE=CNV,Hotspot;CNV_ID=CDK6;CNV_HS=1
chr7	92247386	92247512	CDK6_2.62694	.	GENE_ID=CDK6;Pool=1;PURPOSE=CNV,Hotspot;CNV_ID=CDK6;CNV_HS=1
chr7	92252290	92252386	CDK6_3.39390	.	GENE_ID=CDK6;Pool=2;PURPOSE=CNV,Hotspot;CNV_ID=CDK6;CNV_HS=1
chr7	92300711	92300838	CDK6_4.4588	.	GENE_ID=CDK6;Pool=1;PURPOSE=CNV,Hotspot;CNV_ID=CDK6;CNV_HS=1
chr7	92354939	92355070	CDK6_5.25214	.	GENE_ID=CDK6;Pool=2;PURPOSE=CNV,Hotspot;CNV_ID=CDK6;CNV_HS=1
chr7	92403961	92404068	CDK6_6.25543	.	GENE_ID=CDK6;Pool=1;PURPOSE=CNV,Hotspot;CNV_ID=CDK6;CNV_HS=1
chr7	92404122	92404245	CDK6_6.107693	.	GENE_ID=CDK6;Pool=2;PURPOSE=CNV,Hotspot;CNV_ID=CDK6;CNV_HS=1
chr7	92462415	92462550	CDK6_7.41144	.	GENE_ID=CDK6;Pool=1;PURPOSE=CNV,Hotspot;CNV_ID=CDK6;CNV_HS=1
chr7	92462486	92462618	SP_190.1043	.	GENE_ID=CDK6;Pool=2;PURPOSE=CNV,Hotspot;CNV_ID=CDK6;CNV_HS=1;TRIM_LEFT=5
chr7	116339591	116339712	SP_191.170507	.	GENE_ID=MET;Pool=1;PURPOSE=CNV,Hotspot;CNV_ID=MET;CNV_HS=1
chr7	116339788	116339908	SP_191.251560	.	GENE_ID=MET;Pool=2;PURPOSE=CNV,Hotspot;CNV_ID=MET;CNV_HS=1
chr7	116339997	116340130	MET_1.50171	.	GENE_ID=MET;Pool=1;PURPOSE=CNV,Hotspot;CNV_ID=MET;CNV_HS=1
chr7	116340168	116340288	SP_191.49273	.	GENE_ID=MET;Pool=2;PURPOSE=CNV,Hotspot;CNV_ID=MET;CNV_HS=1
chr7	116411805	116411928	SP_192.65402	.	GENE_ID=MET;Pool=1;PURPOSE=CNV,Hotspot;CNV_ID=MET;CNV_HS=1
chr7	116411970	116412091	SP_192.29876	.	GENE_ID=MET;Pool=2;PURPOSE=CNV,Hotspot;CNV_ID=MET;CNV_HS=1
chr7	116414905	116415014	MET_1.91510	.	GENE_ID=MET;Pool=1;PURPOSE=CNV,Hotspot;CNV_ID=MET;CNV_HS=1
chr7	116414999	116415125	SP_193.28801	.	GENE_ID=MET;Pool=2;PURPOSE=CNV,Hotspot;CNV_ID=MET;CNV_HS=1;TRIM_LEFT=7
chr7	116415058	116415171	MET_1.109142	.	GENE_ID=MET;Pool=1;PURPOSE=CNV,Hotspot;CNV_ID=MET;CNV_HS=1;TRIM_LEFT=6
chr7	116417424	116417546	SP_194.5304	.	GENE_ID=MET;Pool=2;PURPOSE=CNV,Hotspot;CNV_ID=MET;CNV_HS=1
chr7	116418764	116418862	MET_3.109781	.	GENE_ID=MET;Pool=1;PURPOSE=CNV,Hotspot;CNV_ID=MET;CNV_HS=1
chr7	116418861	116418948	MET_3.21265	.	GENE_ID=MET;Pool=2;PURPOSE=CNV,Hotspot;CNV_ID=MET;CNV_HS=1
chr7	116418907	116419015	MET_3.53148	.	GENE_ID=MET;Pool=1;PURPOSE=CNV,Hotspot;CNV_ID=MET;CNV_HS=1;TRIM_LEFT=5
chr7	116422039	116422151	MET_4.96663	.	GENE_ID=MET;Pool=2;PURPOSE=CNV,Hotspot;CNV_ID=MET;CNV_HS=1
chr7	116423283	116423368	MET_5.63664	.	GENE_ID=MET;Pool=1;PURPOSE=CNV,Hotspot;CNV_ID=MET;CNV_HS=1
chr7	116423368	116423493	MET_5.71678	.	GENE_ID=MET;Pool=2;PURPOSE=CNV,Hotspot;CNV_ID=MET;CNV_HS=1
chr7	116423457	116423527	MET_5.99732	.	GENE_ID=MET;Pool=1;PURPOSE=CNV,Hotspot;CNV_ID=MET;CNV_HS=1;TRIM_LEFT=6
chr7	116435706	116435786	MET_6.44564	.	GENE_ID=MET;Pool=2;PURPOSE=CNV,Hotspot;CNV_ID=MET;CNV_HS=1
chr7	116435720	116435840	MET_6.59074	.	GENE_ID=MET;Pool=1;PURPOSE=CNV,Hotspot;CNV_ID=MET;CNV_HS=1;TRIM_LEFT=10
chr7	116435834	116435908	MET_6.63986	.	GENE_ID=MET;Pool=2;PURPOSE=CNV,Hotspot;CNV_ID=MET;CNV_HS=1;TRIM_LEFT=3
chr7	116435928	116436051	MET_7.4396	.	GENE_ID=MET;Pool=1;PURPOSE=CNV,Hotspot;CNV_ID=MET;CNV_HS=1
chr7	128845063	128845188	CHP2_SMO_1	.	GENE_ID=SMO;Pool=1;PURPOSE=Hotspot;CNV_ID=SMO;CNV_HS=0
chr7	128845492	128845622	SP_196.123723	.	GENE_ID=SMO;Pool=2;PURPOSE=Hotspot;CNV_ID=SMO;CNV_HS=0
chr7	128845957	128846063	CHP2_SMO_2	.	GENE_ID=SMO;Pool=2;PURPOSE=Hotspot;CNV_ID=SMO;CNV_HS=0
chr7	128846035	128846132	SP_196.204114	.	GENE_ID=SMO;Pool=1;PURPOSE=Hotspot;CNV_ID=SMO;CNV_HS=0;TRIM_LEFT=5
chr7	128846355	128846446	SP_196.59414	.	GENE_ID=SMO;Pool=2;PURPOSE=Hotspot;CNV_ID=SMO;CNV_HS=0
chr7	128850269	128850363	CHP2_SMO_4	.	GENE_ID=SMO;Pool=2;PURPOSE=Hotspot;CNV_ID=SMO;CNV_HS=0
chr7	128850329	128850445	SP_197.8236	.	GENE_ID=SMO;Pool=1;PURPOSE=Hotspot;CNV_ID=SMO;CNV_HS=0;TRIM_LEFT=2
chr7	128851499	128851612	CHP2_SMO_5	.	GENE_ID=SMO;Pool=1;PURPOSE=Hotspot;CNV_ID=SMO;CNV_HS=0
chr7	140434534	140434653	BRAF_1.16122	.	GENE_ID=BRAF;Pool=1;PURPOSE=CNV,Hotspot;CNV_ID=BRAF;CNV_HS=1
chr7	140439604	140439725	BRAF_2.91202	.	GENE_ID=BRAF;Pool=2;PURPOSE=CNV,Hotspot;CNV_ID=BRAF;CNV_HS=1
chr7	140439717	140439788	BRAF_2.39166	.	GENE_ID=BRAF;Pool=1;PURPOSE=CNV,Hotspot;CNV_ID=BRAF;CNV_HS=1;TRIM_LEFT=4
chr7	140449056	140449162	BRAF_3.23162	.	GENE_ID=BRAF;Pool=2;PURPOSE=CNV,Hotspot;CNV_ID=BRAF;CNV_HS=1
chr7	140449100	140449212	BRAF_3.72492	.	GENE_ID=BRAF;Pool=1;PURPOSE=CNV,Hotspot;CNV_ID=BRAF;CNV_HS=1;TRIM_LEFT=3
chr7	140449212	140449276	BRAF_3.93667	.	GENE_ID=BRAF;Pool=2;PURPOSE=CNV,Hotspot;CNV_ID=BRAF;CNV_HS=1
chr7	140453055	140453126	BRAF_4.75357	.	GENE_ID=BRAF;Pool=1;PURPOSE=CNV,Hotspot;CNV_ID=BRAF;CNV_HS=1
chr7	140453099	140453220	SP_198.30384	.	GENE_ID=BRAF;Pool=2;PURPOSE=CNV,Hotspot;CNV_ID=BRAF;CNV_HS=1;TRIM_LEFT=5
chr7	140453975	140454045	BRAF_5.21466	.	GENE_ID=BRAF;Pool=1;PURPOSE=CNV,Hotspot;CNV_ID=BRAF;CNV_HS=1
chr7	140476674	140476788	BRAF_6.17448	.	GENE_ID=BRAF;Pool=2;PURPOSE=CNV,Hotspot;CNV_ID=BRAF;CNV_HS=1
chr7	140476788	140476862	BRAF_6.108501	.	GENE_ID=BRAF;Pool=1;PURPOSE=CNV,Hotspot;CNV_ID=BRAF;CNV_HS=1
chr7	140476826	140476900	BRAF_6.58632	.	GENE_ID=BRAF;Pool=2;PURPOSE=CNV,Hotspot;CNV_ID=BRAF;CNV_HS=1;TRIM_LEFT=6
chr7	140477726	140477798	BRAF_7.12977	.	GENE_ID=BRAF;Pool=1;PURPOSE=CNV,Hotspot;CNV_ID=BRAF;CNV_HS=1
chr7	140477796	140477875	BRAF_7.37024	.	GENE_ID=BRAF;Pool=2;PURPOSE=CNV,Hotspot;CNV_ID=BRAF;CNV_HS=1
chr7	140481364	140481457	BRAF_8.66330	.	GENE_ID=BRAF;Pool=1;PURPOSE=CNV,Hotspot;CNV_ID=BRAF;CNV_HS=1
chr7	140481392	140481513	BRAF_8.19268	.	GENE_ID=BRAF;Pool=2;PURPOSE=CNV,Hotspot;CNV_ID=BRAF;CNV_HS=1
chr7	148506387	148506497	SP_202.36015	.	GENE_ID=EZH2;Pool=1;PURPOSE=Hotspot;CNV_ID=EZH2;CNV_HS=0
chr7	148508631	148508747	SP_203.35251	.	GENE_ID=EZH2;Pool=2;PURPOSE=Hotspot;CNV_ID=EZH2;CNV_HS=0
chr7	151187998	151188120	SP_204.29905	.	GENE_ID=RHEB;Pool=1;PURPOSE=Hotspot;CNV_ID=RHEB;CNV_HS=0
chr8	38271113	38271251	FGFR1_1.41626	.	GENE_ID=FGFR1;Pool=2;PURPOSE=CNV,Hotspot;CNV_ID=FGFR1;CNV_HS=1
chr8	38271598	38271723	FGFR1_3.91161	.	GENE_ID=FGFR1;Pool=1;PURPOSE=CNV,Hotspot;CNV_ID=FGFR1;CNV_HS=1
chr8	38272265	38272344	FGFR1_5.13775	.	GENE_ID=FGFR1;Pool=2;PURPOSE=CNV,Hotspot;CNV_ID=FGFR1;CNV_HS=1
chr8	38274785	38274903	SP_205.27443	.	GENE_ID=FGFR1;Pool=1;PURPOSE=CNV,Hotspot;CNV_ID=FGFR1;CNV_HS=1
chr8	38274900	38274991	FGFR1_7.54773	.	GENE_ID=FGFR1;Pool=2;PURPOSE=CNV,Hotspot;CNV_ID=FGFR1;CNV_HS=1
chr8	38276987	38277107	FGFR1_10.2239	.	GENE_ID=FGFR1;Pool=1;PURPOSE=CNV,Hotspot;CNV_ID=FGFR1;CNV_HS=1
chr8	38279326	38279457	FGFR1_11.23552	.	GENE_ID=FGFR1;Pool=2;PURPOSE=CNV,Hotspot;CNV_ID=FGFR1;CNV_HS=1
chr8	38281751	38281877	SP_206.9794	.	GENE_ID=FGFR1;Pool=1;PURPOSE=CNV,Hotspot;CNV_ID=FGFR1;CNV_HS=1
chr8	38283615	38283730	FGFR1_13.53735	.	GENE_ID=FGFR1;Pool=2;PURPOSE=CNV,Hotspot;CNV_ID=FGFR1;CNV_HS=1
chr8	38285850	38285975	FGFR1_15.45925	.	GENE_ID=FGFR1;Pool=1;PURPOSE=CNV,Hotspot;CNV_ID=FGFR1;CNV_HS=1
chr8	38297813	38297924	FGFR1_17.46834	.	GENE_ID=FGFR1;Pool=2;PURPOSE=CNV,Hotspot;CNV_ID=FGFR1;CNV_HS=1
chr8	90947803	90947906	NBN_1.26365	.	GENE_ID=NBN;Pool=1;PURPOSE=CDS;CNV_ID=NBN;CNV_HS=1
chr8	90949243	90949315	NBN_2.51196	.	GENE_ID=NBN;Pool=2;PURPOSE=CDS;CNV_ID=NBN;CNV_HS=1
chr8	90955462	90955557	NBN_3.20475	.	GENE_ID=NBN;Pool=1;PURPOSE=CDS;CNV_ID=NBN;CNV_HS=1
chr8	90955557	90955668	NBN_3.67646	.	GENE_ID=NBN;Pool=2;PURPOSE=CDS;CNV_ID=NBN;CNV_HS=1
chr8	90958313	90958429	NBN_4.63728	.	GENE_ID=NBN;Pool=1;PURPOSE=CDS;CNV_ID=NBN;CNV_HS=1
chr8	90958365	90958487	NBN_4.13725	.	GENE_ID=NBN;Pool=2;PURPOSE=CDS;CNV_ID=NBN;CNV_HS=1;TRIM_LEFT=9
chr8	90958479	90958554	NBN_4.46448	.	GENE_ID=NBN;Pool=1;PURPOSE=CDS;CNV_ID=NBN;CNV_HS=1
chr8	90960022	90960142	NBN_5.27572	.	GENE_ID=NBN;Pool=2;PURPOSE=CDS;CNV_ID=NBN;CNV_HS=1
chr8	90965444	90965562	NBN_6.78377	.	GENE_ID=NBN;Pool=1;PURPOSE=CDS;CNV_ID=NBN;CNV_HS=1
chr8	90965562	90965674	NBN_6.98589	.	GENE_ID=NBN;Pool=2;PURPOSE=CDS;CNV_ID=NBN;CNV_HS=1
chr8	90965655	90965777	NBN_6.10256	.	GENE_ID=NBN;Pool=1;PURPOSE=CDS;CNV_ID=NBN;CNV_HS=1;TRIM_LEFT=4
chr8	90965719	90965828	NBN_6.62156	.	GENE_ID=NBN;Pool=2;PURPOSE=CDS;CNV_ID=NBN;CNV_HS=1;TRIM_LEFT=6
chr8	90965819	90965938	NBN_6.28173	.	GENE_ID=NBN;Pool=1;PURPOSE=CDS;CNV_ID=NBN;CNV_HS=1
chr8	90967430	90967514	NBN_7.67856	.	GENE_ID=NBN;Pool=2;PURPOSE=CDS;CNV_ID=NBN;CNV_HS=1
chr8	90967506	90967612	NBN_7.126419	.	GENE_ID=NBN;Pool=1;PURPOSE=CDS;CNV_ID=NBN;CNV_HS=1;TRIM_LEFT=6
chr8	90967589	90967687	NBN_7.105177	.	GENE_ID=NBN;Pool=2;PURPOSE=CDS;CNV_ID=NBN;CNV_HS=1;TRIM_LEFT=6
chr8	90967662	90967777	NBN_7.117159	.	GENE_ID=NBN;Pool=1;PURPOSE=CDS;CNV_ID=NBN;CNV_HS=1;TRIM_LEFT=10
chr8	90967751	90967823	NBN_7.41341	.	GENE_ID=NBN;Pool=2;PURPOSE=CDS;CNV_ID=NBN;CNV_HS=1;TRIM_LEFT=5
chr8	90970896	90970969	NBN_8.37639	.	GENE_ID=NBN;Pool=1;PURPOSE=CDS;CNV_ID=NBN;CNV_HS=1
chr8	90970968	90971089	NBN_8.5381	.	GENE_ID=NBN;Pool=2;PURPOSE=CDS;CNV_ID=NBN;CNV_HS=1
chr8	90976611	90976709	NBN_9.31903	.	GENE_ID=NBN;Pool=1;PURPOSE=CDS;CNV_ID=NBN;CNV_HS=1
chr8	90976709	90976823	NBN_9.27189	.	GENE_ID=NBN;Pool=2;PURPOSE=CDS;CNV_ID=NBN;CNV_HS=1
chr8	90982521	90982611	NBN_10.89235	.	GENE_ID=NBN;Pool=1;PURPOSE=CDS;CNV_ID=NBN;CNV_HS=1
chr8	90982606	90982724	NBN_10.2409	.	GENE_ID=NBN;Pool=2;PURPOSE=CDS;CNV_ID=NBN;CNV_HS=1
chr8	90982690	90982769	NBN_10.41338	.	GENE_ID=NBN;Pool=1;PURPOSE=CDS;CNV_ID=NBN;CNV_HS=1;TRIM_LEFT=3
chr8	90982764	90982835	NBN_10.51869	.	GENE_ID=NBN;Pool=2;PURPOSE=CDS;CNV_ID=NBN;CNV_HS=1
chr8	90983342	90983452	NBN_11.35188	.	GENE_ID=NBN;Pool=1;PURPOSE=CDS;CNV_ID=NBN;CNV_HS=1
chr8	90983409	90983504	NBN_11.3890	.	GENE_ID=NBN;Pool=2;PURPOSE=CDS;CNV_ID=NBN;CNV_HS=1;TRIM_LEFT=4
chr8	90983504	90983571	NBN_11.2270	.	GENE_ID=NBN;Pool=1;PURPOSE=CDS;CNV_ID=NBN;CNV_HS=1
chr8	90990425	90990535	NBN_12.44360	.	GENE_ID=NBN;Pool=2;PURPOSE=CDS;CNV_ID=NBN;CNV_HS=1
chr8	90990535	90990622	NBN_12.37431	.	GENE_ID=NBN;Pool=1;PURPOSE=CDS;CNV_ID=NBN;CNV_HS=1
chr8	90992925	90992994	NBN_13.39898	.	GENE_ID=NBN;Pool=2;PURPOSE=CDS;CNV_ID=NBN;CNV_HS=1
chr8	90992970	90993061	NBN_13.18829	.	GENE_ID=NBN;Pool=1;PURPOSE=CDS;CNV_ID=NBN;CNV_HS=1;TRIM_LEFT=7
chr8	90993037	90993150	NBN_13.67976	.	GENE_ID=NBN;Pool=2;PURPOSE=CDS;CNV_ID=NBN;CNV_HS=1;TRIM_LEFT=5
chr8	90993572	90993647	NBN_14.66566	.	GENE_ID=NBN;Pool=1;PURPOSE=CDS;CNV_ID=NBN;CNV_HS=1
chr8	90993623	90993746	NBN_14.79737	.	GENE_ID=NBN;Pool=2;PURPOSE=CDS;CNV_ID=NBN;CNV_HS=1;TRIM_LEFT=7
chr8	90993713	90993779	NBN_14.40551	.	GENE_ID=NBN;Pool=1;PURPOSE=CDS;CNV_ID=NBN;CNV_HS=1;TRIM_LEFT=7
chr8	90994890	90994975	NBN_15.8503	.	GENE_ID=NBN;Pool=2;PURPOSE=CDS;CNV_ID=NBN;CNV_HS=1
chr8	90994973	90995047	NBN_15.28300	.	GENE_ID=NBN;Pool=1;PURPOSE=CDS;CNV_ID=NBN;CNV_HS=1
chr8	90995013	90995113	NBN_15.78210	.	GENE_ID=NBN;Pool=2;PURPOSE=CDS;CNV_ID=NBN;CNV_HS=1;TRIM_LEFT=5
chr8	90996722	90996815	NBN_16.12206	.	GENE_ID=NBN;Pool=1;PURPOSE=CDS;CNV_ID=NBN;CNV_HS=1
chr8	128748723	128748852	MYC_1.43444	.	GENE_ID=MYC;Pool=2;PURPOSE=CNV,Hotspot;CNV_ID=MYC;CNV_HS=1
chr8	128748849	128748969	SP_207.2615	.	GENE_ID=MYC;Pool=1;PURPOSE=CNV,Hotspot;CNV_ID=MYC;CNV_HS=1
chr8	128750477	128750614	MYC_2.35299	.	GENE_ID=MYC;Pool=2;PURPOSE=CNV,Hotspot;CNV_ID=MYC;CNV_HS=1
chr8	128750592	128750723	SP_208.15461	.	GENE_ID=MYC;Pool=1;PURPOSE=CNV,Hotspot;CNV_ID=MYC;CNV_HS=1;TRIM_LEFT=6
chr8	128750755	128750854	MYC_2.149544	.	GENE_ID=MYC;Pool=2;PURPOSE=CNV,Hotspot;CNV_ID=MYC;CNV_HS=1
chr8	128750883	128751018	MYC_2.80986	.	GENE_ID=MYC;Pool=1;PURPOSE=CNV,Hotspot;CNV_ID=MYC;CNV_HS=1
chr8	128751050	128751141	MYC_2.24113	.	GENE_ID=MYC;Pool=2;PURPOSE=CNV,Hotspot;CNV_ID=MYC;CNV_HS=1
chr8	128752549	128752671	MYC_3.24453	.	GENE_ID=MYC;Pool=1;PURPOSE=CNV,Hotspot;CNV_ID=MYC;CNV_HS=1
chr8	128752729	128752857	MYC_3.82767	.	GENE_ID=MYC;Pool=2;PURPOSE=CNV,Hotspot;CNV_ID=MYC;CNV_HS=1
chr8	128752895	128753024	MYC_3.231727	.	GENE_ID=MYC;Pool=1;PURPOSE=CNV,Hotspot;CNV_ID=MYC;CNV_HS=1
chr8	128753077	128753198	MYC_3.179895	.	GENE_ID=MYC;Pool=2;PURPOSE=CNV,Hotspot;CNV_ID=MYC;CNV_HS=1
chr9	5073721	5073843	SP_209.8809	.	GENE_ID=JAK2;Pool=1;PURPOSE=Hotspot;CNV_ID=JAK2;CNV_HS=0
chr9	21968185	21968268	OCP1_CDKN2A_1	.	GENE_ID=CDKN2A;Pool=2;PURPOSE=CDS;CNV_ID=CDKN2A;CNV_HS=1
chr9	21968688	21968817	OCP1_CDKN2A_2	.	GENE_ID=CDKN2A;Pool=1;PURPOSE=CDS;CNV_ID=CDKN2A;CNV_HS=1
chr9	21970847	21970929	OCP1_CDKN2A_3	.	GENE_ID=CDKN2A;Pool=2;PURPOSE=CDS;CNV_ID=CDKN2A;CNV_HS=1
chr9	21970940	21971066	CHP2_CDKN2A_2	.	GENE_ID=CDKN2A;Pool=1;PURPOSE=CDS;CNV_ID=CDKN2A;CNV_HS=1
chr9	21971090	21971219	CHP2_CDKN2A_1	.	GENE_ID=CDKN2A;Pool=2;PURPOSE=CDS;CNV_ID=CDKN2A;CNV_HS=1
chr9	21974449	21974575	CDKN2A_1.22249	.	GENE_ID=CDKN2A;Pool=1;PURPOSE=CDS;CNV_ID=CDKN2A;CNV_HS=1
chr9	21974575	21974661	CDKN2A_1.21380	.	GENE_ID=CDKN2A;Pool=2;PURPOSE=CDS;CNV_ID=CDKN2A;CNV_HS=1
chr9	21974606	21974743	CDKN2A_1.28958	.	GENE_ID=CDKN2A;Pool=1;PURPOSE=CDS;CNV_ID=CDKN2A;CNV_HS=1;TRIM_LEFT=8
chr9	21974707	21974791	CDKN2A_1.26121	.	GENE_ID=CDKN2A;Pool=2;PURPOSE=CDS;CNV_ID=CDKN2A;CNV_HS=1;TRIM_LEFT=6
chr9	21974787	21974896	OCP1_CDKN2A_7	.	GENE_ID=CDKN2A;Pool=1;PURPOSE=CDS;CNV_ID=CDKN2A;CNV_HS=1
chr9	21994070	21994176	OCP1_CDKN2A_8	.	GENE_ID=CDKN2A;Pool=2;PURPOSE=CDS;CNV_ID=CDKN2A;CNV_HS=1
chr9	21994162	21994295	OCP1_CDKN2A_9	.	GENE_ID=CDKN2A;Pool=1;PURPOSE=CDS;CNV_ID=CDKN2A;CNV_HS=1;TRIM_LEFT=4
chr9	21994274	21994389	OCP1_CDKN2A_10	.	GENE_ID=CDKN2A;Pool=2;PURPOSE=CDS;CNV_ID=CDKN2A;CNV_HS=1;TRIM_LEFT=9
chr9	22005843	22005940	CDKN2B_1.43551	.	GENE_ID=CDKN2B;Pool=1;PURPOSE=CDS;CNV_ID=CDKN2B;CNV_HS=1
chr9	22005924	22006010	CDKN2B_1.37620	.	GENE_ID=CDKN2B;Pool=2;PURPOSE=CDS;CNV_ID=CDKN2B;CNV_HS=1;TRIM_LEFT=13
chr9	22005990	22006118	CDKN2B_1.47384	.	GENE_ID=CDKN2B;Pool=1;PURPOSE=CDS;CNV_ID=CDKN2B;CNV_HS=1;TRIM_LEFT=6
chr9	22006054	22006159	CDKN2B_1.62138	.	GENE_ID=CDKN2B;Pool=2;PURPOSE=CDS;CNV_ID=CDKN2B;CNV_HS=1;TRIM_LEFT=4
chr9	22006148	22006286	CDKN2B_1.21849	.	GENE_ID=CDKN2B;Pool=1;PURPOSE=CDS;CNV_ID=CDKN2B;CNV_HS=1;TRIM_LEFT=2
chr9	22006259	22006373	CDKN2B_1.46358	.	GENE_ID=CDKN2B;Pool=2;PURPOSE=CDS;CNV_ID=CDKN2B;CNV_HS=1;TRIM_LEFT=6
chr9	22008584	22008686	CDKN2B_2.36099	.	GENE_ID=CDKN2B;Pool=1;PURPOSE=CDS;CNV_ID=CDKN2B;CNV_HS=1
chr9	22008710	22008823	CDKN2B_2.36178	.	GENE_ID=CDKN2B;Pool=2;PURPOSE=CDS;CNV_ID=CDKN2B;CNV_HS=1
chr9	22008726	22008856	CDKN2B_2.42488	.	GENE_ID=CDKN2B;Pool=1;PURPOSE=CDS;CNV_ID=CDKN2B;CNV_HS=1;TRIM_LEFT=5
chr9	22008850	22008979	CDKN2B_2.36744	.	GENE_ID=CDKN2B;Pool=2;PURPOSE=CDS;CNV_ID=CDKN2B;CNV_HS=1
chr9	80409443	80409558	SP_210.20187	.	GENE_ID=GNAQ;Pool=1;PURPOSE=Hotspot;CNV_ID=GNAQ;CNV_HS=0
chr9	80412432	80412552	SP_211.30633	.	GENE_ID=GNAQ;Pool=2;PURPOSE=Hotspot;CNV_ID=GNAQ;CNV_HS=0
chr9	80537100	80537220	SP_212.21712	.	GENE_ID=GNAQ;Pool=1;PURPOSE=Hotspot;CNV_ID=GNAQ;CNV_HS=0
chr9	87285661	87285792	NTRK2_1.64442	.	GENE_ID=NTRK2;Pool=2;PURPOSE=CNV,Hotspot;CNV_ID=NTRK2;CNV_HS=1
chr9	87317234	87317356	NTRK2_3.32398	.	GENE_ID=NTRK2;Pool=1;PURPOSE=CNV,Hotspot;CNV_ID=NTRK2;CNV_HS=1
chr9	87338494	87338620	NTRK2_6.7624	.	GENE_ID=NTRK2;Pool=2;PURPOSE=CNV,Hotspot;CNV_ID=NTRK2;CNV_HS=1
chr9	87342596	87342721	NTRK2_8.165734	.	GENE_ID=NTRK2;Pool=1;PURPOSE=CNV,Hotspot;CNV_ID=NTRK2;CNV_HS=1
chr9	87342703	87342813	SP_213.31145	.	GENE_ID=NTRK2;Pool=2;PURPOSE=CNV,Hotspot;CNV_ID=NTRK2;CNV_HS=1
chr9	87366872	87366990	NTRK2_11.33968	.	GENE_ID=NTRK2;Pool=1;PURPOSE=CNV,Hotspot;CNV_ID=NTRK2;CNV_HS=1
chr9	87366906	87367023	SP_214.20621	.	GENE_ID=NTRK2;Pool=2;PURPOSE=CNV,Hotspot;CNV_ID=NTRK2;CNV_HS=1;TRIM_LEFT=10
chr9	87482183	87482305	NTRK2_14.39368	.	GENE_ID=NTRK2;Pool=1;PURPOSE=CNV,Hotspot;CNV_ID=NTRK2;CNV_HS=1
chr9	87549181	87549301	NTRK2_16.72273	.	GENE_ID=NTRK2;Pool=2;PURPOSE=CNV,Hotspot;CNV_ID=NTRK2;CNV_HS=1
chr9	87563414	87563534	SP_215.62895	.	GENE_ID=NTRK2;Pool=1;PURPOSE=CNV,Hotspot;CNV_ID=NTRK2;CNV_HS=1
chr9	87570282	87570427	NTRK2_1.12584	.	GENE_ID=NTRK2;Pool=2;PURPOSE=CNV,Hotspot;CNV_ID=NTRK2;CNV_HS=1
chr9	87635106	87635216	NTRK2_19.87389	.	GENE_ID=NTRK2;Pool=1;PURPOSE=CNV,Hotspot;CNV_ID=NTRK2;CNV_HS=1
chr9	98209088	98209221	OCP1_PTCH1_1	.	GENE_ID=PTCH1;Pool=2;PURPOSE=CDS;CNV_ID=PTCH1;CNV_HS=1
chr9	98209210	98209304	OCP1_PTCH1_2	.	GENE_ID=PTCH1;Pool=1;PURPOSE=CDS;CNV_ID=PTCH1;CNV_HS=1;TRIM_LEFT=8
chr9	98209293	98209418	PTCH1_1.61444	.	GENE_ID=PTCH1;Pool=2;PURPOSE=CDS;CNV_ID=PTCH1;CNV_HS=1;TRIM_LEFT=3
chr9	98209409	98209537	PTCH1_1.20831	.	GENE_ID=PTCH1;Pool=1;PURPOSE=CDS;CNV_ID=PTCH1;CNV_HS=1;TRIM_LEFT=6
chr9	98209506	98209601	OCP1_PTCH1_5	.	GENE_ID=PTCH1;Pool=2;PURPOSE=CDS;CNV_ID=PTCH1;CNV_HS=1;TRIM_LEFT=9
chr9	98209590	98209723	PTCH1_1.76354	.	GENE_ID=PTCH1;Pool=1;PURPOSE=CDS;CNV_ID=PTCH1;CNV_HS=1;TRIM_LEFT=9
chr9	98209712	98209806	OCP1_PTCH1_7	.	GENE_ID=PTCH1;Pool=2;PURPOSE=CDS;CNV_ID=PTCH1;CNV_HS=1;TRIM_LEFT=6
chr9	98211243	98211371	OCP1_PTCH1_8	.	GENE_ID=PTCH1;Pool=1;PURPOSE=CDS;CNV_ID=PTCH1;CNV_HS=1
chr9	98211360	98211493	OCP1_PTCH1_9	.	GENE_ID=PTCH1;Pool=2;PURPOSE=CDS;CNV_ID=PTCH1;CNV_HS=1;TRIM_LEFT=6
chr9	98211482	98211603	OCP1_PTCH1_10	.	GENE_ID=PTCH1;Pool=1;PURPOSE=CDS;CNV_ID=PTCH1;CNV_HS=1;TRIM_LEFT=5
chr9	98211593	98211678	OCP1_PTCH1_11	.	GENE_ID=PTCH1;Pool=2;PURPOSE=CDS;CNV_ID=PTCH1;CNV_HS=1;TRIM_LEFT=3
chr9	98212053	98212173	OCP1_PTCH1_12	.	GENE_ID=PTCH1;Pool=1;PURPOSE=CDS;CNV_ID=PTCH1;CNV_HS=1
chr9	98212152	98212229	OCP1_PTCH1_13	.	GENE_ID=PTCH1;Pool=2;PURPOSE=CDS;CNV_ID=PTCH1;CNV_HS=1;TRIM_LEFT=7
chr9	98215750	98215883	OCP1_PTCH1_14	.	GENE_ID=PTCH1;Pool=1;PURPOSE=CDS;CNV_ID=PTCH1;CNV_HS=1
chr9	98215783	98215908	OCP1_PTCH1_15	.	GENE_ID=PTCH1;Pool=2;PURPOSE=CDS;CNV_ID=PTCH1;CNV_HS=1;TRIM_LEFT=4
chr9	98218551	98218659	OCP1_PTCH1_16	.	GENE_ID=PTCH1;Pool=1;PURPOSE=CDS;CNV_ID=PTCH1;CNV_HS=1
chr9	98218648	98218773	OCP1_PTCH1_17	.	GENE_ID=PTCH1;Pool=2;PURPOSE=CDS;CNV_ID=PTCH1;CNV_HS=1;TRIM_LEFT=9
chr9	98220270	98220394	OCP1_PTCH1_18	.	GENE_ID=PTCH1;Pool=1;PURPOSE=CDS;CNV_ID=PTCH1;CNV_HS=1
chr9	98220374	98220495	OCP1_PTCH1_19	.	GENE_ID=PTCH1;Pool=2;PURPOSE=CDS;CNV_ID=PTCH1;CNV_HS=1;TRIM_LEFT=9
chr9	98220484	98220609	OCP1_PTCH1_20	.	GENE_ID=PTCH1;Pool=1;PURPOSE=CDS;CNV_ID=PTCH1;CNV_HS=1;TRIM_LEFT=5
chr9	98221786	98221916	OCP1_PTCH1_21	.	GENE_ID=PTCH1;Pool=2;PURPOSE=CDS;CNV_ID=PTCH1;CNV_HS=1
chr9	98221910	98222040	OCP1_PTCH1_22	.	GENE_ID=PTCH1;Pool=1;PURPOSE=CDS;CNV_ID=PTCH1;CNV_HS=1
chr9	98222034	98222147	PTCH1_4.119743	.	GENE_ID=PTCH1;Pool=2;PURPOSE=CDS;CNV_ID=PTCH1;CNV_HS=1;TRIM_LEFT=2
chr9	98224045	98224174	OCP1_PTCH1_24	.	GENE_ID=PTCH1;Pool=1;PURPOSE=CDS;CNV_ID=PTCH1;CNV_HS=1
chr9	98224163	98224259	OCP1_PTCH1_25	.	GENE_ID=PTCH1;Pool=2;PURPOSE=CDS;CNV_ID=PTCH1;CNV_HS=1;TRIM_LEFT=3
chr9	98224232	98224305	OCP1_PTCH1_26	.	GENE_ID=PTCH1;Pool=1;PURPOSE=CDS;CNV_ID=PTCH1;CNV_HS=1;TRIM_LEFT=2
chr9	98229348	98229470	OCP1_PTCH1_27	.	GENE_ID=PTCH1;Pool=2;PURPOSE=CDS;CNV_ID=PTCH1;CNV_HS=1
chr9	98229455	98229528	OCP1_PTCH1_28	.	GENE_ID=PTCH1;Pool=1;PURPOSE=CDS;CNV_ID=PTCH1;CNV_HS=1;TRIM_LEFT=4
chr9	98229519	98229645	OCP1_PTCH1_29	.	GENE_ID=PTCH1;Pool=2;PURPOSE=CDS;CNV_ID=PTCH1;CNV_HS=1;TRIM_LEFT=4
chr9	98229632	98229748	OCP1_PTCH1_30	.	GENE_ID=PTCH1;Pool=1;PURPOSE=CDS;CNV_ID=PTCH1;CNV_HS=1;TRIM_LEFT=7
chr9	98230968	98231045	OCP1_PTCH1_31	.	GENE_ID=PTCH1;Pool=2;PURPOSE=CDS;CNV_ID=PTCH1;CNV_HS=1
chr9	98231034	98231146	OCP1_PTCH1_32	.	GENE_ID=PTCH1;Pool=1;PURPOSE=CDS;CNV_ID=PTCH1;CNV_HS=1;TRIM_LEFT=4
chr9	98231141	98231275	OCP1_PTCH1_33	.	GENE_ID=PTCH1;Pool=2;PURPOSE=CDS;CNV_ID=PTCH1;CNV_HS=1
chr9	98231264	98231393	OCP1_PTCH1_34	.	GENE_ID=PTCH1;Pool=1;PURPOSE=CDS;CNV_ID=PTCH1;CNV_HS=1;TRIM_LEFT=8
chr9	98231382	98231478	OCP1_PTCH1_35	.	GENE_ID=PTCH1;Pool=2;PURPOSE=CDS;CNV_ID=PTCH1;CNV_HS=1;TRIM_LEFT=7
chr9	98232020	98232108	OCP1_PTCH1_36	.	GENE_ID=PTCH1;Pool=1;PURPOSE=CDS;CNV_ID=PTCH1;CNV_HS=1
chr9	98232096	98232185	OCP1_PTCH1_37	.	GENE_ID=PTCH1;Pool=2;PURPOSE=CDS;CNV_ID=PTCH1;CNV_HS=1;TRIM_LEFT=8
chr9	98232174	98232257	OCP1_PTCH1_38	.	GENE_ID=PTCH1;Pool=1;PURPOSE=CDS;CNV_ID=PTCH1;CNV_HS=1;TRIM_LEFT=6
chr9	98238245	98238379	OCP1_PTCH1_39	.	GENE_ID=PTCH1;Pool=2;PURPOSE=CDS;CNV_ID=PTCH1;CNV_HS=1
chr9	98238356	98238488	OCP1_PTCH1_40	.	GENE_ID=PTCH1;Pool=1;PURPOSE=CDS;CNV_ID=PTCH1;CNV_HS=1;TRIM_LEFT=6
chr9	98238948	98239052	OCP1_PTCH1_41	.	GENE_ID=PTCH1;Pool=2;PURPOSE=CDS;CNV_ID=PTCH1;CNV_HS=1
chr9	98239041	98239123	OCP1_PTCH1_42	.	GENE_ID=PTCH1;Pool=1;PURPOSE=CDS;CNV_ID=PTCH1;CNV_HS=1;TRIM_LEFT=7
chr9	98239115	98239192	OCP1_PTCH1_43	.	GENE_ID=PTCH1;Pool=2;PURPOSE=CDS;CNV_ID=PTCH1;CNV_HS=1
chr9	98239807	98239893	OCP1_PTCH1_44	.	GENE_ID=PTCH1;Pool=1;PURPOSE=CDS;CNV_ID=PTCH1;CNV_HS=1
chr9	98239881	98240009	OCP1_PTCH1_45	.	GENE_ID=PTCH1;Pool=2;PURPOSE=CDS;CNV_ID=PTCH1;CNV_HS=1;TRIM_LEFT=2
chr9	98240306	98240421	OCP1_PTCH1_46	.	GENE_ID=PTCH1;Pool=1;PURPOSE=CDS;CNV_ID=PTCH1;CNV_HS=1
chr9	98240402	98240495	OCP1_PTCH1_47	.	GENE_ID=PTCH1;Pool=2;PURPOSE=CDS;CNV_ID=PTCH1;CNV_HS=1;TRIM_LEFT=6
chr9	98241253	98241376	OCP1_PTCH1_48	.	GENE_ID=PTCH1;Pool=1;PURPOSE=CDS;CNV_ID=PTCH1;CNV_HS=1
chr9	98241365	98241458	OCP1_PTCH1_49	.	GENE_ID=PTCH1;Pool=2;PURPOSE=CDS;CNV_ID=PTCH1;CNV_HS=1;TRIM_LEFT=4
chr9	98242231	98242341	OCP1_PTCH1_50	.	GENE_ID=PTCH1;Pool=1;PURPOSE=CDS;CNV_ID=PTCH1;CNV_HS=1
chr9	98242330	98242450	OCP1_PTCH1_51	.	GENE_ID=PTCH1;Pool=2;PURPOSE=CDS;CNV_ID=PTCH1;CNV_HS=1;TRIM_LEFT=4
chr9	98242585	98242710	OCP1_PTCH1_52	.	GENE_ID=PTCH1;Pool=1;PURPOSE=CDS;CNV_ID=PTCH1;CNV_HS=1
chr9	98242692	98242791	OCP1_PTCH1_53	.	GENE_ID=PTCH1;Pool=2;PURPOSE=CDS;CNV_ID=PTCH1;CNV_HS=1;TRIM_LEFT=8
chr9	98242780	98242895	OCP1_PTCH1_54	.	GENE_ID=PTCH1;Pool=1;PURPOSE=CDS;CNV_ID=PTCH1;CNV_HS=1;TRIM_LEFT=5
chr9	98244191	98244278	OCP1_PTCH1_55	.	GENE_ID=PTCH1;Pool=2;PURPOSE=CDS;CNV_ID=PTCH1;CNV_HS=1
chr9	98244269	98244349	OCP1_PTCH1_56	.	GENE_ID=PTCH1;Pool=1;PURPOSE=CDS;CNV_ID=PTCH1;CNV_HS=1;TRIM_LEFT=6
chr9	98244397	98244497	OCP1_PTCH1_58	.	GENE_ID=PTCH1;Pool=2;PURPOSE=CDS;CNV_ID=PTCH1;CNV_HS=1
chr9	98247952	98248076	OCP1_PTCH1_59	.	GENE_ID=PTCH1;Pool=1;PURPOSE=CDS;CNV_ID=PTCH1;CNV_HS=1
chr9	98248066	98248182	OCP1_PTCH1_60	.	GENE_ID=PTCH1;Pool=2;PURPOSE=CDS;CNV_ID=PTCH1;CNV_HS=1;TRIM_LEFT=4
chr9	98268628	98268715	OCP1_PTCH1_61	.	GENE_ID=PTCH1;Pool=1;PURPOSE=CDS;CNV_ID=PTCH1;CNV_HS=1
chr9	98268703	98268807	OCP1_PTCH1_62	.	GENE_ID=PTCH1;Pool=2;PURPOSE=CDS;CNV_ID=PTCH1;CNV_HS=1;TRIM_LEFT=6
chr9	98268796	98268886	OCP1_PTCH1_63	.	GENE_ID=PTCH1;Pool=1;PURPOSE=CDS;CNV_ID=PTCH1;CNV_HS=1;TRIM_LEFT=4
chr9	98270403	98270495	OCP1_PTCH1_64	.	GENE_ID=PTCH1;Pool=2;PURPOSE=CDS;CNV_ID=PTCH1;CNV_HS=1
chr9	98270495	98270628	PTCH1_5.22102	.	GENE_ID=PTCH1;Pool=1;PURPOSE=CDS;CNV_ID=PTCH1;CNV_HS=1
chr9	98270553	98270669	PTCH1_5.22206	.	GENE_ID=PTCH1;Pool=2;PURPOSE=CDS;CNV_ID=PTCH1;CNV_HS=1;TRIM_LEFT=7
chr9	98278872	98278993	OCP1_PTCH1_66	.	GENE_ID=PTCH1;Pool=1;PURPOSE=CDS;CNV_ID=PTCH1;CNV_HS=1
chr9	98278957	98279055	PTCH1_6.67478	.	GENE_ID=PTCH1;Pool=2;PURPOSE=CDS;CNV_ID=PTCH1;CNV_HS=1;TRIM_LEFT=16
chr9	98279055	98279146	PTCH1_6.5830	.	GENE_ID=PTCH1;Pool=1;PURPOSE=CDS;CNV_ID=PTCH1;CNV_HS=1
chr9	135771565	135771644	OCP1_TSC1_1	.	GENE_ID=TSC1;Pool=2;PURPOSE=CDS;CNV_ID=TSC1;CNV_HS=1
chr9	135771633	135771752	OCP1_TSC1_2	.	GENE_ID=TSC1;Pool=1;PURPOSE=CDS;CNV_ID=TSC1;CNV_HS=1;TRIM_LEFT=8
chr9	135771741	135771863	OCP1_TSC1_3	.	GENE_ID=TSC1;Pool=2;PURPOSE=CDS;CNV_ID=TSC1;CNV_HS=1;TRIM_LEFT=4
chr9	135771852	135771963	OCP1_TSC1_4	.	GENE_ID=TSC1;Pool=1;PURPOSE=CDS;CNV_ID=TSC1;CNV_HS=1;TRIM_LEFT=5
chr9	135771930	135772016	TSC1_1.213309	.	GENE_ID=TSC1;Pool=2;PURPOSE=CDS;CNV_ID=TSC1;CNV_HS=1;TRIM_LEFT=3
chr9	135771997	135772081	TSC1_1.193385	.	GENE_ID=TSC1;Pool=1;PURPOSE=CDS;CNV_ID=TSC1;CNV_HS=1;TRIM_LEFT=11
chr9	135772074	135772190	OCP1_TSC1_6	.	GENE_ID=TSC1;Pool=2;PURPOSE=CDS;CNV_ID=TSC1;CNV_HS=1;TRIM_LEFT=5
chr9	135772537	135772661	OCP1_TSC1_7	.	GENE_ID=TSC1;Pool=1;PURPOSE=CDS;CNV_ID=TSC1;CNV_HS=1
chr9	135772651	135772759	OCP1_TSC1_8	.	GENE_ID=TSC1;Pool=2;PURPOSE=CDS;CNV_ID=TSC1;CNV_HS=1;TRIM_LEFT=4
chr9	135772766	135772879	OCP1_TSC1_9	.	GENE_ID=TSC1;Pool=1;PURPOSE=CDS;CNV_ID=TSC1;CNV_HS=1
chr9	135772868	135772961	OCP1_TSC1_10	.	GENE_ID=TSC1;Pool=2;PURPOSE=CDS;CNV_ID=TSC1;CNV_HS=1;TRIM_LEFT=6
chr9	135772925	135773044	TSC1_2.90898	.	GENE_ID=TSC1;Pool=1;PURPOSE=CDS;CNV_ID=TSC1;CNV_HS=1;TRIM_LEFT=10
chr9	135776030	135776130	OCP1_TSC1_12	.	GENE_ID=TSC1;Pool=2;PURPOSE=CDS;CNV_ID=TSC1;CNV_HS=1
chr9	135776127	135776252	OCP1_TSC1_13	.	GENE_ID=TSC1;Pool=1;PURPOSE=CDS;CNV_ID=TSC1;CNV_HS=1
chr9	135776901	135777021	OCP1_TSC1_14	.	GENE_ID=TSC1;Pool=2;PURPOSE=CDS;CNV_ID=TSC1;CNV_HS=1
chr9	135777001	135777121	OCP1_TSC1_15	.	GENE_ID=TSC1;Pool=1;PURPOSE=CDS;CNV_ID=TSC1;CNV_HS=1;TRIM_LEFT=3
chr9	135777911	135778010	OCP1_TSC1_16	.	GENE_ID=TSC1;Pool=2;PURPOSE=CDS;CNV_ID=TSC1;CNV_HS=1
chr9	135778006	135778082	TSC1_3.85989	.	GENE_ID=TSC1;Pool=1;PURPOSE=CDS;CNV_ID=TSC1;CNV_HS=1
chr9	135778077	135778175	OCP1_TSC1_18	.	GENE_ID=TSC1;Pool=2;PURPOSE=CDS;CNV_ID=TSC1;CNV_HS=1
chr9	135778164	135778234	OCP1_TSC1_19	.	GENE_ID=TSC1;Pool=1;PURPOSE=CDS;CNV_ID=TSC1;CNV_HS=1;TRIM_LEFT=2
chr9	135778995	135779118	OCP1_TSC1_20	.	GENE_ID=TSC1;Pool=2;PURPOSE=CDS;CNV_ID=TSC1;CNV_HS=1
chr9	135779091	135779179	OCP1_TSC1_21	.	GENE_ID=TSC1;Pool=1;PURPOSE=CDS;CNV_ID=TSC1;CNV_HS=1;TRIM_LEFT=6
chr9	135779164	135779239	OCP1_TSC1_22	.	GENE_ID=TSC1;Pool=2;PURPOSE=CDS;CNV_ID=TSC1;CNV_HS=1;TRIM_LEFT=8
chr9	135779792	135779890	OCP1_TSC1_23	.	GENE_ID=TSC1;Pool=1;PURPOSE=CDS;CNV_ID=TSC1;CNV_HS=1
chr9	135780921	135781037	OCP1_TSC1_24	.	GENE_ID=TSC1;Pool=2;PURPOSE=CDS;CNV_ID=TSC1;CNV_HS=1
chr9	135781026	135781128	OCP1_TSC1_25	.	GENE_ID=TSC1;Pool=1;PURPOSE=CDS;CNV_ID=TSC1;CNV_HS=1;TRIM_LEFT=5
chr9	135781117	135781230	OCP1_TSC1_26	.	GENE_ID=TSC1;Pool=2;PURPOSE=CDS;CNV_ID=TSC1;CNV_HS=1;TRIM_LEFT=2
chr9	135781219	135781338	OCP1_TSC1_27	.	GENE_ID=TSC1;Pool=1;PURPOSE=CDS;CNV_ID=TSC1;CNV_HS=1;TRIM_LEFT=6
chr9	135781327	135781452	OCP1_TSC1_28	.	GENE_ID=TSC1;Pool=2;PURPOSE=CDS;CNV_ID=TSC1;CNV_HS=1;TRIM_LEFT=6
chr9	135781440	135781563	OCP1_TSC1_29	.	GENE_ID=TSC1;Pool=1;PURPOSE=CDS;CNV_ID=TSC1;CNV_HS=1;TRIM_LEFT=7
chr9	135782110	135782227	TSC1_4.92254	.	GENE_ID=TSC1;Pool=2;PURPOSE=CDS;CNV_ID=TSC1;CNV_HS=1
chr9	135782661	135782783	OCP1_TSC1_33	.	GENE_ID=TSC1;Pool=1;PURPOSE=CDS;CNV_ID=TSC1;CNV_HS=1
chr9	135785897	135785987	OCP1_TSC1_34	.	GENE_ID=TSC1;Pool=2;PURPOSE=CDS;CNV_ID=TSC1;CNV_HS=1
chr9	135785955	135786084	OCP1_TSC1_35	.	GENE_ID=TSC1;Pool=1;PURPOSE=CDS;CNV_ID=TSC1;CNV_HS=1;TRIM_LEFT=6
chr9	135786299	135786419	OCP1_TSC1_36	.	GENE_ID=TSC1;Pool=2;PURPOSE=CDS;CNV_ID=TSC1;CNV_HS=1
chr9	135786411	135786531	OCP1_TSC1_37	.	GENE_ID=TSC1;Pool=1;PURPOSE=CDS;CNV_ID=TSC1;CNV_HS=1
chr9	135786770	135786866	OCP1_TSC1_38	.	GENE_ID=TSC1;Pool=2;PURPOSE=CDS;CNV_ID=TSC1;CNV_HS=1
chr9	135786861	135786981	OCP1_TSC1_39	.	GENE_ID=TSC1;Pool=1;PURPOSE=CDS;CNV_ID=TSC1;CNV_HS=1
chr9	135787641	135787733	OCP1_TSC1_40	.	GENE_ID=TSC1;Pool=2;PURPOSE=CDS;CNV_ID=TSC1;CNV_HS=1
chr9	135787697	135787796	OCP1_TSC1_41	.	GENE_ID=TSC1;Pool=1;PURPOSE=CDS;CNV_ID=TSC1;CNV_HS=1;TRIM_LEFT=10
chr9	135787785	135787896	OCP1_TSC1_42	.	GENE_ID=TSC1;Pool=2;PURPOSE=CDS;CNV_ID=TSC1;CNV_HS=1;TRIM_LEFT=6
chr9	135796655	135796776	OCP1_TSC1_43	.	GENE_ID=TSC1;Pool=1;PURPOSE=CDS;CNV_ID=TSC1;CNV_HS=1
chr9	135796765	135796854	OCP1_TSC1_44	.	GENE_ID=TSC1;Pool=2;PURPOSE=CDS;CNV_ID=TSC1;CNV_HS=1;TRIM_LEFT=6
chr9	135797168	135797281	OCP1_TSC1_45	.	GENE_ID=TSC1;Pool=1;PURPOSE=CDS;CNV_ID=TSC1;CNV_HS=1
chr9	135797268	135797386	OCP1_TSC1_46	.	GENE_ID=TSC1;Pool=2;PURPOSE=CDS;CNV_ID=TSC1;CNV_HS=1;TRIM_LEFT=3
chr9	135798663	135798760	OCP1_TSC1_47	.	GENE_ID=TSC1;Pool=1;PURPOSE=CDS;CNV_ID=TSC1;CNV_HS=1
chr9	135798744	135798819	OCP1_TSC1_48	.	GENE_ID=TSC1;Pool=2;PURPOSE=CDS;CNV_ID=TSC1;CNV_HS=1;TRIM_LEFT=5
chr9	135798808	135798926	OCP1_TSC1_49	.	GENE_ID=TSC1;Pool=1;PURPOSE=CDS;CNV_ID=TSC1;CNV_HS=1;TRIM_LEFT=6
chr9	135800912	135800997	OCP1_TSC1_50	.	GENE_ID=TSC1;Pool=2;PURPOSE=CDS;CNV_ID=TSC1;CNV_HS=1
chr9	135800984	135801059	OCP1_TSC1_51	.	GENE_ID=TSC1;Pool=1;PURPOSE=CDS;CNV_ID=TSC1;CNV_HS=1;TRIM_LEFT=3
chr9	135801049	135801128	OCP1_TSC1_52	.	GENE_ID=TSC1;Pool=2;PURPOSE=CDS;CNV_ID=TSC1;CNV_HS=1;TRIM_LEFT=8
chr9	135801117	135801193	OCP1_TSC1_53	.	GENE_ID=TSC1;Pool=1;PURPOSE=CDS;CNV_ID=TSC1;CNV_HS=1;TRIM_LEFT=7
chr9	135802553	135802677	OCP1_TSC1_54	.	GENE_ID=TSC1;Pool=2;PURPOSE=CDS;CNV_ID=TSC1;CNV_HS=1
chr9	135802666	135802737	OCP1_TSC1_55	.	GENE_ID=TSC1;Pool=1;PURPOSE=CDS;CNV_ID=TSC1;CNV_HS=1;TRIM_LEFT=7
chr9	135804110	135804237	OCP1_TSC1_56	.	GENE_ID=TSC1;Pool=2;PURPOSE=CDS;CNV_ID=TSC1;CNV_HS=1
chr9	135804193	135804300	OCP1_TSC1_57	.	GENE_ID=TSC1;Pool=1;PURPOSE=CDS;CNV_ID=TSC1;CNV_HS=1;TRIM_LEFT=8
chr9	139390440	139390556	OCP1_NOTCH1_1	.	GENE_ID=NOTCH1;Pool=2;PURPOSE=CDS;CNV_ID=NOTCH1;CNV_HS=1
chr9	139390543	139390631	OCP1_NOTCH1_2	.	GENE_ID=NOTCH1;Pool=1;PURPOSE=CDS;CNV_ID=NOTCH1;CNV_HS=1;TRIM_LEFT=6
chr9	139390617	139390703	OCP1_NOTCH1_3	.	GENE_ID=NOTCH1;Pool=2;PURPOSE=CDS;CNV_ID=NOTCH1;CNV_HS=1;TRIM_LEFT=4
chr9	139390692	139390778	OCP1_NOTCH1_4	.	GENE_ID=NOTCH1;Pool=1;PURPOSE=CDS;CNV_ID=NOTCH1;CNV_HS=1;TRIM_LEFT=3
chr9	139390764	139390885	CHP2_NOTCH1_3	.	GENE_ID=NOTCH1;Pool=2;PURPOSE=CDS;CNV_ID=NOTCH1;CNV_HS=1;TRIM_LEFT=5
chr9	139390867	139391001	OCP1_NOTCH1_5	.	GENE_ID=NOTCH1;Pool=1;PURPOSE=CDS;CNV_ID=NOTCH1;CNV_HS=1;TRIM_LEFT=5
chr9	139390990	139391124	OCP1_NOTCH1_6	.	GENE_ID=NOTCH1;Pool=2;PURPOSE=CDS;CNV_ID=NOTCH1;CNV_HS=1
chr9	139391111	139391236	OCP1_NOTCH1_7	.	GENE_ID=NOTCH1;Pool=1;PURPOSE=CDS;CNV_ID=NOTCH1;CNV_HS=1;TRIM_LEFT=2
chr9	139391233	139391369	OCP1_NOTCH1_8	.	GENE_ID=NOTCH1;Pool=2;PURPOSE=CDS;CNV_ID=NOTCH1;CNV_HS=1
chr9	139391311	139391446	OCP1_NOTCH1_9	.	GENE_ID=NOTCH1;Pool=1;PURPOSE=CDS;CNV_ID=NOTCH1;CNV_HS=1;TRIM_LEFT=7
chr9	139391398	139391522	NOTCH1_1.2.68963	.	GENE_ID=NOTCH1;Pool=2;PURPOSE=CDS;CNV_ID=NOTCH1;CNV_HS=1;TRIM_LEFT=11
chr9	139391500	139391588	NOTCH1_1.2.70535	.	GENE_ID=NOTCH1;Pool=1;PURPOSE=CDS;CNV_ID=NOTCH1;CNV_HS=1;TRIM_LEFT=4
chr9	139391562	139391675	OCP1_NOTCH1_11	.	GENE_ID=NOTCH1;Pool=2;PURPOSE=CDS;CNV_ID=NOTCH1;CNV_HS=1;TRIM_LEFT=3
chr9	139391664	139391756	OCP1_NOTCH1_12	.	GENE_ID=NOTCH1;Pool=1;PURPOSE=CDS;CNV_ID=NOTCH1;CNV_HS=1;TRIM_LEFT=6
chr9	139391734	139391844	NOTCH1_1.2.52636	.	GENE_ID=NOTCH1;Pool=2;PURPOSE=CDS;CNV_ID=NOTCH1;CNV_HS=1;TRIM_LEFT=7
chr9	139391844	139391948	OCP1_NOTCH1_14	.	GENE_ID=NOTCH1;Pool=1;PURPOSE=CDS;CNV_ID=NOTCH1;CNV_HS=1
chr9	139391937	139392068	OCP1_NOTCH1_15	.	GENE_ID=NOTCH1;Pool=2;PURPOSE=CDS;CNV_ID=NOTCH1;CNV_HS=1;TRIM_LEFT=5
chr9	139393299	139393389	OCP1_NOTCH1_16	.	GENE_ID=NOTCH1;Pool=1;PURPOSE=CDS;CNV_ID=NOTCH1;CNV_HS=1
chr9	139393372	139393451	OCP1_NOTCH1_17	.	GENE_ID=NOTCH1;Pool=2;PURPOSE=CDS;CNV_ID=NOTCH1;CNV_HS=1;TRIM_LEFT=3
chr9	139393470	139393597	OCP1_NOTCH1_18	.	GENE_ID=NOTCH1;Pool=1;PURPOSE=CDS;CNV_ID=NOTCH1;CNV_HS=1
chr9	139393578	139393693	OCP1_NOTCH1_19	.	GENE_ID=NOTCH1;Pool=2;PURPOSE=CDS;CNV_ID=NOTCH1;CNV_HS=1;TRIM_LEFT=5
chr9	139393661	139393748	OCP1_NOTCH1_20	.	GENE_ID=NOTCH1;Pool=1;PURPOSE=CDS;CNV_ID=NOTCH1;CNV_HS=1;TRIM_LEFT=8
chr9	139394931	139395055	NOTCH1_3.42022	.	GENE_ID=NOTCH1;Pool=2;PURPOSE=CDS;CNV_ID=NOTCH1;CNV_HS=1
chr9	139395030	139395120	OCP1_NOTCH1_22	.	GENE_ID=NOTCH1;Pool=1;PURPOSE=CDS;CNV_ID=NOTCH1;CNV_HS=1;TRIM_LEFT=5
chr9	139395108	139395205	OCP1_NOTCH1_23	.	GENE_ID=NOTCH1;Pool=2;PURPOSE=CDS;CNV_ID=NOTCH1;CNV_HS=1;TRIM_LEFT=4
chr9	139395197	139395311	OCP1_NOTCH1_24	.	GENE_ID=NOTCH1;Pool=1;PURPOSE=CDS;CNV_ID=NOTCH1;CNV_HS=1;TRIM_LEFT=5
chr9	139396096	139396232	OCP1_NOTCH1_25	.	GENE_ID=NOTCH1;Pool=2;PURPOSE=CDS;CNV_ID=NOTCH1;CNV_HS=1
chr9	139396229	139396357	OCP1_NOTCH1_26	.	GENE_ID=NOTCH1;Pool=1;PURPOSE=CDS;CNV_ID=NOTCH1;CNV_HS=1
chr9	139396343	139396448	OCP1_NOTCH1_27	.	GENE_ID=NOTCH1;Pool=2;PURPOSE=CDS;CNV_ID=NOTCH1;CNV_HS=1;TRIM_LEFT=2
chr9	139396451	139396546	OCP1_NOTCH1_28	.	GENE_ID=NOTCH1;Pool=1;PURPOSE=CDS;CNV_ID=NOTCH1;CNV_HS=1
chr9	139396684	139396770	NOTCH1_4.19179	.	GENE_ID=NOTCH1;Pool=2;PURPOSE=CDS;CNV_ID=NOTCH1;CNV_HS=1
chr9	139396751	139396900	NOTCH1_4.27625	.	GENE_ID=NOTCH1;Pool=1;PURPOSE=CDS;CNV_ID=NOTCH1;CNV_HS=1;TRIM_LEFT=12
chr9	139396824	139396961	NOTCH1_4.3482	.	GENE_ID=NOTCH1;Pool=2;PURPOSE=CDS;CNV_ID=NOTCH1;CNV_HS=1;TRIM_LEFT=8
chr9	139397619	139397744	OCP1_NOTCH1_32	.	GENE_ID=NOTCH1;Pool=1;PURPOSE=CDS;CNV_ID=NOTCH1;CNV_HS=1
chr9	139397762	139397879	CHP2_NOTCH1_2	.	GENE_ID=NOTCH1;Pool=2;PURPOSE=CDS;CNV_ID=NOTCH1;CNV_HS=1
chr9	139398996	139399133	OCP1_NOTCH1_33	.	GENE_ID=NOTCH1;Pool=1;PURPOSE=CDS;CNV_ID=NOTCH1;CNV_HS=1
chr9	139399123	139399242	NOTCH1_6.37092	.	GENE_ID=NOTCH1;Pool=2;PURPOSE=CDS;CNV_ID=NOTCH1;CNV_HS=1;TRIM_LEFT=7
chr9	139399232	139399349	NOTCH1_6.23098	.	GENE_ID=NOTCH1;Pool=1;PURPOSE=CDS;CNV_ID=NOTCH1;CNV_HS=1;TRIM_LEFT=4
chr9	139399312	139399450	NOTCH1_6.31101	.	GENE_ID=NOTCH1;Pool=2;PURPOSE=CDS;CNV_ID=NOTCH1;CNV_HS=1;TRIM_LEFT=3
chr9	139399450	139399569	OCP1_NOTCH1_36	.	GENE_ID=NOTCH1;Pool=1;PURPOSE=CDS;CNV_ID=NOTCH1;CNV_HS=1
chr9	139399729	139399840	OCP1_NOTCH1_37	.	GENE_ID=NOTCH1;Pool=2;PURPOSE=CDS;CNV_ID=NOTCH1;CNV_HS=1
chr9	139399825	139399937	OCP1_NOTCH1_38	.	GENE_ID=NOTCH1;Pool=1;PURPOSE=CDS;CNV_ID=NOTCH1;CNV_HS=1;TRIM_LEFT=3
chr9	139399919	139400050	OCP1_NOTCH1_39	.	GENE_ID=NOTCH1;Pool=2;PURPOSE=CDS;CNV_ID=NOTCH1;CNV_HS=1;TRIM_LEFT=5
chr9	139400019	139400149	OCP1_NOTCH1_40	.	GENE_ID=NOTCH1;Pool=1;PURPOSE=CDS;CNV_ID=NOTCH1;CNV_HS=1;TRIM_LEFT=10
chr9	139400139	139400255	OCP1_NOTCH1_41	.	GENE_ID=NOTCH1;Pool=2;PURPOSE=CDS;CNV_ID=NOTCH1;CNV_HS=1;TRIM_LEFT=5
chr9	139400206	139400338	OCP1_NOTCH1_42	.	GENE_ID=NOTCH1;Pool=1;PURPOSE=CDS;CNV_ID=NOTCH1;CNV_HS=1;TRIM_LEFT=6
chr9	139400938	139401070	OCP1_NOTCH1_43	.	GENE_ID=NOTCH1;Pool=2;PURPOSE=CDS;CNV_ID=NOTCH1;CNV_HS=1
chr9	139401070	139401199	OCP1_NOTCH1_44	.	GENE_ID=NOTCH1;Pool=1;PURPOSE=CDS;CNV_ID=NOTCH1;CNV_HS=1
chr9	139401196	139401334	OCP1_NOTCH1_45	.	GENE_ID=NOTCH1;Pool=2;PURPOSE=CDS;CNV_ID=NOTCH1;CNV_HS=1
chr9	139401329	139401434	OCP1_NOTCH1_46	.	GENE_ID=NOTCH1;Pool=1;PURPOSE=CDS;CNV_ID=NOTCH1;CNV_HS=1
chr9	139401671	139401777	OCP1_NOTCH1_47	.	GENE_ID=NOTCH1;Pool=2;PURPOSE=CDS;CNV_ID=NOTCH1;CNV_HS=1
chr9	139401757	139401873	OCP1_NOTCH1_48	.	GENE_ID=NOTCH1;Pool=1;PURPOSE=CDS;CNV_ID=NOTCH1;CNV_HS=1;TRIM_LEFT=2
chr9	139401862	139401995	OCP1_NOTCH1_49	.	GENE_ID=NOTCH1;Pool=2;PURPOSE=CDS;CNV_ID=NOTCH1;CNV_HS=1;TRIM_LEFT=4
chr9	139402380	139402494	OCP1_NOTCH1_50	.	GENE_ID=NOTCH1;Pool=1;PURPOSE=CDS;CNV_ID=NOTCH1;CNV_HS=1
chr9	139402483	139402606	OCP1_NOTCH1_51	.	GENE_ID=NOTCH1;Pool=2;PURPOSE=CDS;CNV_ID=NOTCH1;CNV_HS=1;TRIM_LEFT=6
chr9	139402647	139402755	OCP1_NOTCH1_52	.	GENE_ID=NOTCH1;Pool=1;PURPOSE=CDS;CNV_ID=NOTCH1;CNV_HS=1
chr9	139402690	139402816	OCP1_NOTCH1_53	.	GENE_ID=NOTCH1;Pool=2;PURPOSE=CDS;CNV_ID=NOTCH1;CNV_HS=1;TRIM_LEFT=7
chr9	139402806	139402930	NOTCH1_8.8028	.	GENE_ID=NOTCH1;Pool=1;PURPOSE=CDS;CNV_ID=NOTCH1;CNV_HS=1;TRIM_LEFT=5
chr9	139403302	139403409	OCP1_NOTCH1_55	.	GENE_ID=NOTCH1;Pool=2;PURPOSE=CDS;CNV_ID=NOTCH1;CNV_HS=1
chr9	139403398	139403508	OCP1_NOTCH1_56	.	GENE_ID=NOTCH1;Pool=1;PURPOSE=CDS;CNV_ID=NOTCH1;CNV_HS=1
chr9	139403497	139403584	OCP1_NOTCH1_57	.	GENE_ID=NOTCH1;Pool=2;PURPOSE=CDS;CNV_ID=NOTCH1;CNV_HS=1
chr9	139404173	139404299	OCP1_NOTCH1_58	.	GENE_ID=NOTCH1;Pool=1;PURPOSE=CDS;CNV_ID=NOTCH1;CNV_HS=1
chr9	139404288	139404418	OCP1_NOTCH1_59	.	GENE_ID=NOTCH1;Pool=2;PURPOSE=CDS;CNV_ID=NOTCH1;CNV_HS=1;TRIM_LEFT=5
chr9	139405021	139405136	OCP1_NOTCH1_60	.	GENE_ID=NOTCH1;Pool=1;PURPOSE=CDS;CNV_ID=NOTCH1;CNV_HS=1
chr9	139405135	139405269	OCP1_NOTCH1_61	.	GENE_ID=NOTCH1;Pool=2;PURPOSE=CDS;CNV_ID=NOTCH1;CNV_HS=1
chr9	139405564	139405703	OCP1_NOTCH1_62	.	GENE_ID=NOTCH1;Pool=1;PURPOSE=CDS;CNV_ID=NOTCH1;CNV_HS=1
chr9	139405658	139405767	OCP1_NOTCH1_63	.	GENE_ID=NOTCH1;Pool=2;PURPOSE=CDS;CNV_ID=NOTCH1;CNV_HS=1
chr9	139407416	139407501	NOTCH1_9.44371	.	GENE_ID=NOTCH1;Pool=1;PURPOSE=CDS;CNV_ID=NOTCH1;CNV_HS=1
chr9	139407479	139407598	OCP1_NOTCH1_65	.	GENE_ID=NOTCH1;Pool=2;PURPOSE=CDS;CNV_ID=NOTCH1;CNV_HS=1;TRIM_LEFT=10
chr9	139407829	139407933	OCP1_NOTCH1_66	.	GENE_ID=NOTCH1;Pool=1;PURPOSE=CDS;CNV_ID=NOTCH1;CNV_HS=1
chr9	139407914	139408013	OCP1_NOTCH1_67	.	GENE_ID=NOTCH1;Pool=2;PURPOSE=CDS;CNV_ID=NOTCH1;CNV_HS=1;TRIM_LEFT=6
chr9	139408945	139409069	NOTCH1_10.56731	.	GENE_ID=NOTCH1;Pool=1;PURPOSE=CDS;CNV_ID=NOTCH1;CNV_HS=1
chr9	139409032	139409155	OCP1_NOTCH1_69	.	GENE_ID=NOTCH1;Pool=2;PURPOSE=CDS;CNV_ID=NOTCH1;CNV_HS=1;TRIM_LEFT=8
chr9	139409144	139409265	OCP1_NOTCH1_70	.	GENE_ID=NOTCH1;Pool=1;PURPOSE=CDS;CNV_ID=NOTCH1;CNV_HS=1;TRIM_LEFT=5
chr9	139409697	139409788	OCP1_NOTCH1_71	.	GENE_ID=NOTCH1;Pool=2;PURPOSE=CDS;CNV_ID=NOTCH1;CNV_HS=1
chr9	139409777	139409866	OCP1_NOTCH1_72	.	GENE_ID=NOTCH1;Pool=1;PURPOSE=CDS;CNV_ID=NOTCH1;CNV_HS=1
chr9	139409885	139410015	OCP1_NOTCH1_73	.	GENE_ID=NOTCH1;Pool=2;PURPOSE=CDS;CNV_ID=NOTCH1;CNV_HS=1
chr9	139409953	139410074	OCP1_NOTCH1_74	.	GENE_ID=NOTCH1;Pool=1;PURPOSE=CDS;CNV_ID=NOTCH1;CNV_HS=1;TRIM_LEFT=4
chr9	139410059	139410192	OCP1_NOTCH1_75	.	GENE_ID=NOTCH1;Pool=2;PURPOSE=CDS;CNV_ID=NOTCH1;CNV_HS=1;TRIM_LEFT=8
chr9	139410417	139410524	OCP1_NOTCH1_76	.	GENE_ID=NOTCH1;Pool=1;PURPOSE=CDS;CNV_ID=NOTCH1;CNV_HS=1
chr9	139410513	139410622	OCP1_NOTCH1_77	.	GENE_ID=NOTCH1;Pool=2;PURPOSE=CDS;CNV_ID=NOTCH1;CNV_HS=1;TRIM_LEFT=6
chr9	139411687	139411788	OCP1_NOTCH1_78	.	GENE_ID=NOTCH1;Pool=1;PURPOSE=CDS;CNV_ID=NOTCH1;CNV_HS=1
chr9	139411781	139411895	NOTCH1_11.11975	.	GENE_ID=NOTCH1;Pool=2;PURPOSE=CDS;CNV_ID=NOTCH1;CNV_HS=1
chr9	139412180	139412272	OCP1_NOTCH1_80	.	GENE_ID=NOTCH1;Pool=1;PURPOSE=CDS;CNV_ID=NOTCH1;CNV_HS=1
chr9	139412257	139412349	OCP1_NOTCH1_81	.	GENE_ID=NOTCH1;Pool=2;PURPOSE=CDS;CNV_ID=NOTCH1;CNV_HS=1;TRIM_LEFT=6
chr9	139412338	139412435	OCP1_NOTCH1_82	.	GENE_ID=NOTCH1;Pool=1;PURPOSE=CDS;CNV_ID=NOTCH1;CNV_HS=1;TRIM_LEFT=4
chr9	139412479	139412598	OCP1_NOTCH1_83	.	GENE_ID=NOTCH1;Pool=2;PURPOSE=CDS;CNV_ID=NOTCH1;CNV_HS=1
chr9	139412590	139412728	OCP1_NOTCH1_84	.	GENE_ID=NOTCH1;Pool=1;PURPOSE=CDS;CNV_ID=NOTCH1;CNV_HS=1
chr9	139412726	139412864	OCP1_NOTCH1_85	.	GENE_ID=NOTCH1;Pool=2;PURPOSE=CDS;CNV_ID=NOTCH1;CNV_HS=1
chr9	139412951	139413062	OCP1_NOTCH1_86	.	GENE_ID=NOTCH1;Pool=1;PURPOSE=CDS;CNV_ID=NOTCH1;CNV_HS=1
chr9	139413055	139413154	OCP1_NOTCH1_87	.	GENE_ID=NOTCH1;Pool=2;PURPOSE=CDS;CNV_ID=NOTCH1;CNV_HS=1
chr9	139413143	139413255	OCP1_NOTCH1_88	.	GENE_ID=NOTCH1;Pool=1;PURPOSE=CDS;CNV_ID=NOTCH1;CNV_HS=1
chr9	139413243	139413335	OCP1_NOTCH1_89	.	GENE_ID=NOTCH1;Pool=2;PURPOSE=CDS;CNV_ID=NOTCH1;CNV_HS=1;TRIM_LEFT=3
chr9	139413889	139413984	OCP1_NOTCH1_90	.	GENE_ID=NOTCH1;Pool=1;PURPOSE=CDS;CNV_ID=NOTCH1;CNV_HS=1
chr9	139413974	139414084	OCP1_NOTCH1_91	.	GENE_ID=NOTCH1;Pool=2;PURPOSE=CDS;CNV_ID=NOTCH1;CNV_HS=1;TRIM_LEFT=3
chr9	139417228	139417354	NOTCH1_12.41322	.	GENE_ID=NOTCH1;Pool=1;PURPOSE=CDS;CNV_ID=NOTCH1;CNV_HS=1
chr9	139417315	139417427	OCP1_NOTCH1_93	.	GENE_ID=NOTCH1;Pool=2;PURPOSE=CDS;CNV_ID=NOTCH1;CNV_HS=1;TRIM_LEFT=4
chr9	139417406	139417495	OCP1_NOTCH1_94	.	GENE_ID=NOTCH1;Pool=1;PURPOSE=CDS;CNV_ID=NOTCH1;CNV_HS=1;TRIM_LEFT=5
chr9	139417484	139417578	NOTCH1_12.24282	.	GENE_ID=NOTCH1;Pool=2;PURPOSE=CDS;CNV_ID=NOTCH1;CNV_HS=1;TRIM_LEFT=5
chr9	139417564	139417652	OCP1_NOTCH1_96	.	GENE_ID=NOTCH1;Pool=1;PURPOSE=CDS;CNV_ID=NOTCH1;CNV_HS=1;TRIM_LEFT=4
chr9	139418095	139418204	OCP1_NOTCH1_97	.	GENE_ID=NOTCH1;Pool=2;PURPOSE=CDS;CNV_ID=NOTCH1;CNV_HS=1
chr9	139418203	139418337	OCP1_NOTCH1_98	.	GENE_ID=NOTCH1;Pool=1;PURPOSE=CDS;CNV_ID=NOTCH1;CNV_HS=1
chr9	139418324	139418442	OCP1_NOTCH1_99	.	GENE_ID=NOTCH1;Pool=2;PURPOSE=CDS;CNV_ID=NOTCH1;CNV_HS=1;TRIM_LEFT=3
chr9	139438449	139438578	OCP1_NOTCH1_100	.	GENE_ID=NOTCH1;Pool=1;PURPOSE=CDS;CNV_ID=NOTCH1;CNV_HS=1
chr10	43609069	43609167	SP_34.8955	.	GENE_ID=RET;Pool=1;PURPOSE=Hotspot;CNV_ID=RET;CNV_HS=0
chr10	43609875	43610009	SP_35.15963	.	GENE_ID=RET;Pool=2;PURPOSE=Hotspot;CNV_ID=RET;CNV_HS=0
chr10	43611940	43612047	RET_1.77824	.	GENE_ID=RET;Pool=1;PURPOSE=Hotspot;CNV_ID=RET;CNV_HS=0
chr10	43612040	43612171	RET_1.37243	.	GENE_ID=RET;Pool=2;PURPOSE=Hotspot;CNV_ID=RET;CNV_HS=0;TRIM_LEFT=3
chr10	43612167	43612254	RET_1.67991	.	GENE_ID=RET;Pool=1;PURPOSE=Hotspot;CNV_ID=RET;CNV_HS=0;TRIM_LEFT=2
chr10	43613765	43613893	SP_36.35782	.	GENE_ID=RET;Pool=2;PURPOSE=Hotspot;CNV_ID=RET;CNV_HS=0
chr10	43613865	43613979	RET_1.17391	.	GENE_ID=RET;Pool=1;PURPOSE=Hotspot;CNV_ID=RET;CNV_HS=0;TRIM_LEFT=2
chr10	43614944	43615036	SP_37.93472	.	GENE_ID=RET;Pool=2;PURPOSE=Hotspot;CNV_ID=RET;CNV_HS=0
chr10	43615015	43615126	RET_3.28682	.	GENE_ID=RET;Pool=1;PURPOSE=Hotspot;CNV_ID=RET;CNV_HS=0;TRIM_LEFT=6
chr10	43615113	43615202	RET_3.20703	.	GENE_ID=RET;Pool=2;PURPOSE=Hotspot;CNV_ID=RET;CNV_HS=0;TRIM_LEFT=7
chr10	43615479	43615567	RET_4.4170	.	GENE_ID=RET;Pool=1;PURPOSE=Hotspot;CNV_ID=RET;CNV_HS=0
chr10	43615546	43615687	CHP2_RET_4	.	GENE_ID=RET;Pool=2;PURPOSE=Hotspot;CNV_ID=RET;CNV_HS=0;TRIM_LEFT=2
chr10	43617316	43617439	SP_38.50353	.	GENE_ID=RET;Pool=1;PURPOSE=Hotspot;CNV_ID=RET;CNV_HS=0
chr10	43617396	43617490	RET_5.3712	.	GENE_ID=RET;Pool=2;PURPOSE=Hotspot;CNV_ID=RET;CNV_HS=0;TRIM_LEFT=4
chr10	43619117	43619252	RET_6.26910	.	GENE_ID=RET;Pool=1;PURPOSE=Hotspot;CNV_ID=RET;CNV_HS=0
chr10	43619211	43619293	RET_6.6108	.	GENE_ID=RET;Pool=2;PURPOSE=Hotspot;CNV_ID=RET;CNV_HS=0;TRIM_LEFT=5
chr10	43620318	43620444	RET_7.80805	.	GENE_ID=RET;Pool=1;PURPOSE=Hotspot;CNV_ID=RET;CNV_HS=0
chr10	89624207	89624300	CHP2_PTEN_1	.	GENE_ID=PTEN;Pool=2;PURPOSE=CDS;CNV_ID=PTEN;CNV_HS=1
chr10	89624254	89624324	OCP1_PTEN_1	.	GENE_ID=PTEN;Pool=1;PURPOSE=CDS;CNV_ID=PTEN;CNV_HS=1
chr10	89653766	89653841	OCP1_PTEN_2	.	GENE_ID=PTEN;Pool=2;PURPOSE=CDS;CNV_ID=PTEN;CNV_HS=1
chr10	89653819	89653930	OCP1_PTEN_3	.	GENE_ID=PTEN;Pool=1;PURPOSE=CDS;CNV_ID=PTEN;CNV_HS=1;TRIM_LEFT=5
chr10	89685258	89685374	CHP2_PTEN_2	.	GENE_ID=PTEN;Pool=2;PURPOSE=CDS;CNV_ID=PTEN;CNV_HS=1
chr10	89690782	89690877	OCP1_PTEN_4	.	GENE_ID=PTEN;Pool=1;PURPOSE=CDS;CNV_ID=PTEN;CNV_HS=1
chr10	89692718	89692817	PTEN_1.66717	.	GENE_ID=PTEN;Pool=2;PURPOSE=CDS;CNV_ID=PTEN;CNV_HS=1
chr10	89692813	89692920	CHP2_PTEN_3	.	GENE_ID=PTEN;Pool=1;PURPOSE=CDS;CNV_ID=PTEN;CNV_HS=1
chr10	89692909	89693032	OCP1_PTEN_6	.	GENE_ID=PTEN;Pool=2;PURPOSE=CDS;CNV_ID=PTEN;CNV_HS=1;TRIM_LEFT=6
chr10	89711804	89711932	CHP2_PTEN_4	.	GENE_ID=PTEN;Pool=1;PURPOSE=CDS;CNV_ID=PTEN;CNV_HS=1
chr10	89711914	89712021	OCP1_PTEN_7	.	GENE_ID=PTEN;Pool=2;PURPOSE=CDS;CNV_ID=PTEN;CNV_HS=1;TRIM_LEFT=4
chr10	89717567	89717679	OCP1_PTEN_8	.	GENE_ID=PTEN;Pool=1;PURPOSE=CDS;CNV_ID=PTEN;CNV_HS=1
chr10	89717666	89717780	CHP2_PTEN_6	.	GENE_ID=PTEN;Pool=2;PURPOSE=CDS;CNV_ID=PTEN;CNV_HS=1;TRIM_LEFT=7
chr10	89720579	89720702	PTEN_2.11413	.	GENE_ID=PTEN;Pool=1;PURPOSE=CDS;CNV_ID=PTEN;CNV_HS=1
chr10	89720701	89720823	PTEN_2.12034	.	GENE_ID=PTEN;Pool=2;PURPOSE=CDS;CNV_ID=PTEN;CNV_HS=1
chr10	89720784	89720900	CHP2_PTEN_8	.	GENE_ID=PTEN;Pool=1;PURPOSE=CDS;CNV_ID=PTEN;CNV_HS=1;TRIM_LEFT=6
chr10	89725023	89725148	OCP1_PTEN_11	.	GENE_ID=PTEN;Pool=2;PURPOSE=CDS;CNV_ID=PTEN;CNV_HS=1
chr10	89725040	89725161	OCP1_PTEN_12	.	GENE_ID=PTEN;Pool=1;PURPOSE=CDS;CNV_ID=PTEN;CNV_HS=1;TRIM_LEFT=5
chr10	123239427	123239553	SP_39.34855	.	GENE_ID=FGFR2;Pool=2;PURPOSE=CNV,Hotspot;CNV_ID=FGFR2;CNV_HS=1
chr10	123244914	123245008	SP_40.527	.	GENE_ID=FGFR2;Pool=1;PURPOSE=CNV,Hotspot;CNV_ID=FGFR2;CNV_HS=1
chr10	123246868	123246991	SP_41.19507	.	GENE_ID=FGFR2;Pool=2;PURPOSE=CNV,Hotspot;CNV_ID=FGFR2;CNV_HS=1
chr10	123247504	123247600	SP_42.9357	.	GENE_ID=FGFR2;Pool=1;PURPOSE=CNV,Hotspot;CNV_ID=FGFR2;CNV_HS=1
chr10	123256041	123256144	SP_43.21755	.	GENE_ID=FGFR2;Pool=2;PURPOSE=CNV,Hotspot;CNV_ID=FGFR2;CNV_HS=1
chr10	123258008	123258122	SP_44.35327	.	GENE_ID=FGFR2;Pool=1;PURPOSE=CNV,Hotspot;CNV_ID=FGFR2;CNV_HS=1
chr10	123263269	123263384	SP_45.11375	.	GENE_ID=FGFR2;Pool=2;PURPOSE=CNV,Hotspot;CNV_ID=FGFR2;CNV_HS=1
chr10	123274721	123274835	CHP2_FGFR2_3	.	GENE_ID=FGFR2;Pool=2;PURPOSE=Hotspot;CNV_ID=FGFR2;CNV_HS=1
chr10	123274732	123274858	SP_46.45652	.	GENE_ID=FGFR2;Pool=1;PURPOSE=CNV,Hotspot;CNV_ID=FGFR2;CNV_HS=1
chr10	123276869	123276987	SP_47.43751	.	GENE_ID=FGFR2;Pool=2;PURPOSE=CNV,Hotspot;CNV_ID=FGFR2;CNV_HS=1
chr10	123279479	123279601	SP_48.38635	.	GENE_ID=FGFR2;Pool=1;PURPOSE=CNV,Hotspot;CNV_ID=FGFR2;CNV_HS=1
chr10	123279615	123279714	SP_48.4137	.	GENE_ID=FGFR2;Pool=2;PURPOSE=CNV,Hotspot;CNV_ID=FGFR2;CNV_HS=1
chr10	123298151	123298272	SP_49.39577	.	GENE_ID=FGFR2;Pool=1;PURPOSE=CNV,Hotspot;CNV_ID=FGFR2;CNV_HS=1
chr11	533349	533497	HRAS_1.12807	.	GENE_ID=HRAS;Pool=2;PURPOSE=Hotspot;CNV_ID=HRAS;CNV_HS=0
chr11	533433	533581	HRAS_1.20990	.	GENE_ID=HRAS;Pool=1;PURPOSE=Hotspot;CNV_ID=HRAS;CNV_HS=0;TRIM_LEFT=4
chr11	533533	533668	SP_50.91797	.	GENE_ID=HRAS;Pool=2;PURPOSE=Hotspot;CNV_ID=HRAS;CNV_HS=0;TRIM_LEFT=7
chr11	533795	533924	SP_50.67755	.	GENE_ID=HRAS;Pool=1;PURPOSE=Hotspot;CNV_ID=HRAS;CNV_HS=0
chr11	534221	534307	SP_50.56288	.	GENE_ID=HRAS;Pool=2;PURPOSE=Hotspot;CNV_ID=HRAS;CNV_HS=0
chr11	69455971	69456111	CCND1_1.32047	.	GENE_ID=CCND1;Pool=1;PURPOSE=CNV,Hotspot;CNV_ID=CCND1;CNV_HS=1
chr11	69456122	69456253	SP_51.14589	.	GENE_ID=CCND1;Pool=2;PURPOSE=CNV,Hotspot;CNV_ID=CCND1;CNV_HS=1
chr11	69456225	69456330	CCND1_1.25143	.	GENE_ID=CCND1;Pool=1;PURPOSE=CNV,Hotspot;CNV_ID=CCND1;CNV_HS=1;TRIM_LEFT=11
chr11	69457728	69457842	CCND1_2.10259	.	GENE_ID=CCND1;Pool=2;PURPOSE=CNV,Hotspot;CNV_ID=CCND1;CNV_HS=1
chr11	69457872	69458009	CCND1_2.23083	.	GENE_ID=CCND1;Pool=1;PURPOSE=CNV,Hotspot;CNV_ID=CCND1;CNV_HS=1
chr11	69457980	69458115	CCND1_2.30536	.	GENE_ID=CCND1;Pool=2;PURPOSE=CNV,Hotspot;CNV_ID=CCND1;CNV_HS=1;TRIM_LEFT=5
chr11	69458611	69458746	CCND1_3.38036	.	GENE_ID=CCND1;Pool=1;PURPOSE=CNV,Hotspot;CNV_ID=CCND1;CNV_HS=1
chr11	69458725	69458843	CCND1_3.35643	.	GENE_ID=CCND1;Pool=2;PURPOSE=CNV,Hotspot;CNV_ID=CCND1;CNV_HS=1;TRIM_LEFT=8
chr11	69462783	69462910	CCND1_4.60818	.	GENE_ID=CCND1;Pool=1;PURPOSE=CNV,Hotspot;CNV_ID=CCND1;CNV_HS=1
chr11	69465808	69465930	CCND1_5.48714	.	GENE_ID=CCND1;Pool=2;PURPOSE=CNV,Hotspot;CNV_ID=CCND1;CNV_HS=1
chr11	69465916	69466035	SP_52.5837	.	GENE_ID=CCND1;Pool=1;PURPOSE=CNV,Hotspot;CNV_ID=CCND1;CNV_HS=1;TRIM_LEFT=12
chr11	69513953	69514087	FGF19_1.94708	.	GENE_ID=FGF19;Pool=2;PURPOSE=CNV;CNV_ID=FGF19;CNV_HS=1
chr11	69514076	69514205	FGF19_1.111711	.	GENE_ID=FGF19;Pool=1;PURPOSE=CNV;CNV_ID=FGF19;CNV_HS=1;TRIM_LEFT=5
chr11	69514194	69514300	FGF19_1.45809	.	GENE_ID=FGF19;Pool=2;PURPOSE=CNV;CNV_ID=FGF19;CNV_HS=1;TRIM_LEFT=4
chr11	69514289	69514409	FGF19_1.89255	.	GENE_ID=FGF19;Pool=1;PURPOSE=CNV;CNV_ID=FGF19;CNV_HS=1;TRIM_LEFT=5
chr11	69517952	69518089	FGF19_2.31663	.	GENE_ID=FGF19;Pool=2;PURPOSE=CNV;CNV_ID=FGF19;CNV_HS=1
chr11	69518078	69518195	FGF19_2.4579	.	GENE_ID=FGF19;Pool=1;PURPOSE=CNV;CNV_ID=FGF19;CNV_HS=1;TRIM_LEFT=2
chr11	69518318	69518435	FGF19_3.13320	.	GENE_ID=FGF19;Pool=2;PURPOSE=CNV;CNV_ID=FGF19;CNV_HS=1
chr11	69518422	69518561	FGF19_1.2762	.	GENE_ID=FGF19;Pool=1;PURPOSE=CNV;CNV_ID=FGF19;CNV_HS=1;TRIM_LEFT=5
chr11	69518547	69518639	FGF19_3.4700	.	GENE_ID=FGF19;Pool=2;PURPOSE=CNV;CNV_ID=FGF19;CNV_HS=1;TRIM_LEFT=5
chr11	69518628	69518740	FGF19_3.11733	.	GENE_ID=FGF19;Pool=1;PURPOSE=CNV;CNV_ID=FGF19;CNV_HS=1;TRIM_LEFT=6
chr11	69624975	69625107	FGF3_1.50	.	GENE_ID=FGF3;Pool=2;PURPOSE=CNV;CNV_ID=FGF3;CNV_HS=1
chr11	69625089	69625218	FGF3_1.16470	.	GENE_ID=FGF3;Pool=1;PURPOSE=CNV;CNV_ID=FGF3;CNV_HS=1;TRIM_LEFT=3
chr11	69625143	69625255	FGF3_1.55250	.	GENE_ID=FGF3;Pool=2;PURPOSE=CNV;CNV_ID=FGF3;CNV_HS=1;TRIM_LEFT=7
chr11	69625243	69625334	FGF3_1.94896	.	GENE_ID=FGF3;Pool=1;PURPOSE=CNV;CNV_ID=FGF3;CNV_HS=1;TRIM_LEFT=2
chr11	69625323	69625420	FGF3_1.33541	.	GENE_ID=FGF3;Pool=2;PURPOSE=CNV;CNV_ID=FGF3;CNV_HS=1;TRIM_LEFT=8
chr11	69625409	69625516	FGF3_1.87192	.	GENE_ID=FGF3;Pool=1;PURPOSE=CNV;CNV_ID=FGF3;CNV_HS=1;TRIM_LEFT=9
chr11	69631000	69631112	FGF3_2.62237	.	GENE_ID=FGF3;Pool=2;PURPOSE=CNV;CNV_ID=FGF3;CNV_HS=1
chr11	69631102	69631191	FGF3_2.38473	.	GENE_ID=FGF3;Pool=1;PURPOSE=CNV;CNV_ID=FGF3;CNV_HS=1
chr11	69633481	69633581	FGF3_3.16106	.	GENE_ID=FGF3;Pool=2;PURPOSE=CNV;CNV_ID=FGF3;CNV_HS=1
chr11	69633566	69633696	FGF3_3.28959	.	GENE_ID=FGF3;Pool=1;PURPOSE=CNV;CNV_ID=FGF3;CNV_HS=1;TRIM_LEFT=6
chr11	69633685	69633775	FGF3_3.5713	.	GENE_ID=FGF3;Pool=2;PURPOSE=CNV;CNV_ID=FGF3;CNV_HS=1;TRIM_LEFT=4
chr11	94153276	94153375	MRE11A_1.55666	.	GENE_ID=MRE11A;Pool=1;PURPOSE=CDS;CNV_ID=MRE11A;CNV_HS=1
chr11	94163014	94163124	MRE11A_2.3371	.	GENE_ID=MRE11A;Pool=2;PURPOSE=CDS;CNV_ID=MRE11A;CNV_HS=1
chr11	94163115	94163190	MRE11A_2.6788	.	GENE_ID=MRE11A;Pool=1;PURPOSE=CDS;CNV_ID=MRE11A;CNV_HS=1;TRIM_LEFT=6
chr11	94168946	94169066	MRE11A_3.13330	.	GENE_ID=MRE11A;Pool=2;PURPOSE=CDS;CNV_ID=MRE11A;CNV_HS=1
chr11	94169054	94169175	MRE11A_3.58187	.	GENE_ID=MRE11A;Pool=1;PURPOSE=CDS;CNV_ID=MRE11A;CNV_HS=1;TRIM_LEFT=4
chr11	94170304	94170399	MRE11A_4.6948	.	GENE_ID=MRE11A;Pool=2;PURPOSE=CDS;CNV_ID=MRE11A;CNV_HS=1
chr11	94170379	94170486	MRE11A_4.19314	.	GENE_ID=MRE11A;Pool=1;PURPOSE=CDS;CNV_ID=MRE11A;CNV_HS=1;TRIM_LEFT=6
chr11	94178921	94178995	MRE11A_5.25071	.	GENE_ID=MRE11A;Pool=2;PURPOSE=CDS;CNV_ID=MRE11A;CNV_HS=1
chr11	94178977	94179075	MRE11A_5.2007	.	GENE_ID=MRE11A;Pool=1;PURPOSE=CDS;CNV_ID=MRE11A;CNV_HS=1;TRIM_LEFT=10
chr11	94180353	94180469	MRE11A_6.136449	.	GENE_ID=MRE11A;Pool=2;PURPOSE=CDS;CNV_ID=MRE11A;CNV_HS=1
chr11	94180431	94180542	MRE11A_6.47971	.	GENE_ID=MRE11A;Pool=1;PURPOSE=CDS;CNV_ID=MRE11A;CNV_HS=1;TRIM_LEFT=9
chr11	94180510	94180612	MRE11A_6.82407	.	GENE_ID=MRE11A;Pool=2;PURPOSE=CDS;CNV_ID=MRE11A;CNV_HS=1;TRIM_LEFT=4
chr11	94189371	94189442	MRE11A_7.29833	.	GENE_ID=MRE11A;Pool=1;PURPOSE=CDS;CNV_ID=MRE11A;CNV_HS=1
chr11	94189441	94189514	MRE11A_7.763	.	GENE_ID=MRE11A;Pool=2;PURPOSE=CDS;CNV_ID=MRE11A;CNV_HS=1
chr11	94192536	94192607	MRE11A_8.10203	.	GENE_ID=MRE11A;Pool=1;PURPOSE=CDS;CNV_ID=MRE11A;CNV_HS=1
chr11	94192597	94192728	MRE11A_8.55213	.	GENE_ID=MRE11A;Pool=2;PURPOSE=CDS;CNV_ID=MRE11A;CNV_HS=1;TRIM_LEFT=3
chr11	94192667	94192752	MRE11A_8.43220	.	GENE_ID=MRE11A;Pool=1;PURPOSE=CDS;CNV_ID=MRE11A;CNV_HS=1;TRIM_LEFT=2
chr11	94194091	94194182	MRE11A_9.45356	.	GENE_ID=MRE11A;Pool=2;PURPOSE=CDS;CNV_ID=MRE11A;CNV_HS=1
chr11	94194182	94194255	MRE11A_9.59390	.	GENE_ID=MRE11A;Pool=1;PURPOSE=CDS;CNV_ID=MRE11A;CNV_HS=1
chr11	94197251	94197339	MRE11A_10.18532	.	GENE_ID=MRE11A;Pool=2;PURPOSE=CDS;CNV_ID=MRE11A;CNV_HS=1
chr11	94197312	94197385	MRE11A_10.82849	.	GENE_ID=MRE11A;Pool=1;PURPOSE=CDS;CNV_ID=MRE11A;CNV_HS=1;TRIM_LEFT=5
chr11	94197375	94197462	MRE11A_10.67571	.	GENE_ID=MRE11A;Pool=2;PURPOSE=CDS;CNV_ID=MRE11A;CNV_HS=1;TRIM_LEFT=5
chr11	94200917	94201010	MRE11A_11.57659	.	GENE_ID=MRE11A;Pool=1;PURPOSE=CDS;CNV_ID=MRE11A;CNV_HS=1
chr11	94200991	94201097	MRE11A_11.11178	.	GENE_ID=MRE11A;Pool=2;PURPOSE=CDS;CNV_ID=MRE11A;CNV_HS=1;TRIM_LEFT=6
chr11	94203614	94203726	MRE11A_12.73308	.	GENE_ID=MRE11A;Pool=1;PURPOSE=CDS;CNV_ID=MRE11A;CNV_HS=1
chr11	94203725	94203798	MRE11A_12.77069	.	GENE_ID=MRE11A;Pool=2;PURPOSE=CDS;CNV_ID=MRE11A;CNV_HS=1
chr11	94203766	94203840	MRE11A_12.65423	.	GENE_ID=MRE11A;Pool=1;PURPOSE=CDS;CNV_ID=MRE11A;CNV_HS=1;TRIM_LEFT=6
chr11	94204726	94204821	MRE11A_13.55292	.	GENE_ID=MRE11A;Pool=2;PURPOSE=CDS;CNV_ID=MRE11A;CNV_HS=1
chr11	94204813	94204909	MRE11A_13.23038	.	GENE_ID=MRE11A;Pool=1;PURPOSE=CDS;CNV_ID=MRE11A;CNV_HS=1;TRIM_LEFT=3
chr11	94204861	94204975	MRE11A_13.51157	.	GENE_ID=MRE11A;Pool=2;PURPOSE=CDS;CNV_ID=MRE11A;CNV_HS=1;TRIM_LEFT=6
chr11	94209419	94209544	MRE11A_14.21829	.	GENE_ID=MRE11A;Pool=1;PURPOSE=CDS;CNV_ID=MRE11A;CNV_HS=1
chr11	94209523	94209632	MRE11A_14.82103	.	GENE_ID=MRE11A;Pool=2;PURPOSE=CDS;CNV_ID=MRE11A;CNV_HS=1;TRIM_LEFT=6
chr11	94211875	94211978	MRE11A_15.88874	.	GENE_ID=MRE11A;Pool=1;PURPOSE=CDS;CNV_ID=MRE11A;CNV_HS=1
chr11	94211972	94212086	MRE11A_15.60582	.	GENE_ID=MRE11A;Pool=2;PURPOSE=CDS;CNV_ID=MRE11A;CNV_HS=1
chr11	94212797	94212896	MRE11A_16.65659	.	GENE_ID=MRE11A;Pool=1;PURPOSE=CDS;CNV_ID=MRE11A;CNV_HS=1
chr11	94212847	94212963	MRE11A_16.19217	.	GENE_ID=MRE11A;Pool=2;PURPOSE=CDS;CNV_ID=MRE11A;CNV_HS=1;TRIM_LEFT=2
chr11	94219072	94219158	MRE11A_17.12514	.	GENE_ID=MRE11A;Pool=1;PURPOSE=CDS;CNV_ID=MRE11A;CNV_HS=1
chr11	94219157	94219252	MRE11A_17.29114	.	GENE_ID=MRE11A;Pool=2;PURPOSE=CDS;CNV_ID=MRE11A;CNV_HS=1
chr11	94219224	94219330	MRE11A_17.32852	.	GENE_ID=MRE11A;Pool=1;PURPOSE=CDS;CNV_ID=MRE11A;CNV_HS=1;TRIM_LEFT=9
chr11	94223925	94224041	MRE11A_18.13008	.	GENE_ID=MRE11A;Pool=2;PURPOSE=CDS;CNV_ID=MRE11A;CNV_HS=1
chr11	94224005	94224092	MRE11A_18.9993	.	GENE_ID=MRE11A;Pool=1;PURPOSE=CDS;CNV_ID=MRE11A;CNV_HS=1;TRIM_LEFT=4
chr11	94224089	94224176	MRE11A_1.9099	.	GENE_ID=MRE11A;Pool=2;PURPOSE=CDS;CNV_ID=MRE11A;CNV_HS=1
chr11	94225918	94226023	MRE11A_19.35251	.	GENE_ID=MRE11A;Pool=1;PURPOSE=CDS;CNV_ID=MRE11A;CNV_HS=1
chr11	108098345	108098461	OCP1_ATM_2	.	GENE_ID=ATM;Pool=2;PURPOSE=CDS;CNV_ID=ATM;CNV_HS=1
chr11	108098494	108098576	OCP1_ATM_3	.	GENE_ID=ATM;Pool=1;PURPOSE=CDS;CNV_ID=ATM;CNV_HS=1
chr11	108098548	108098668	OCP1_ATM_4	.	GENE_ID=ATM;Pool=2;PURPOSE=CDS;CNV_ID=ATM;CNV_HS=1;TRIM_LEFT=6
chr11	108099838	108099957	OCP1_ATM_5	.	GENE_ID=ATM;Pool=1;PURPOSE=CDS;CNV_ID=ATM;CNV_HS=1
chr11	108099957	108100080	OCP1_ATM_6	.	GENE_ID=ATM;Pool=2;PURPOSE=CDS;CNV_ID=ATM;CNV_HS=1
chr11	108106356	108106466	OCP1_ATM_7	.	GENE_ID=ATM;Pool=1;PURPOSE=CDS;CNV_ID=ATM;CNV_HS=1
chr11	108106429	108106544	OCP1_ATM_8	.	GENE_ID=ATM;Pool=2;PURPOSE=CDS;CNV_ID=ATM;CNV_HS=1;TRIM_LEFT=8
chr11	108106533	108106600	OCP1_ATM_9	.	GENE_ID=ATM;Pool=1;PURPOSE=CDS;CNV_ID=ATM;CNV_HS=1;TRIM_LEFT=5
chr11	108114593	108114707	ATM_1.35312	.	GENE_ID=ATM;Pool=2;PURPOSE=CDS;CNV_ID=ATM;CNV_HS=1
chr11	108114704	108114779	OCP1_ATM_11	.	GENE_ID=ATM;Pool=1;PURPOSE=CDS;CNV_ID=ATM;CNV_HS=1
chr11	108114768	108114886	OCP1_ATM_12	.	GENE_ID=ATM;Pool=2;PURPOSE=CDS;CNV_ID=ATM;CNV_HS=1;TRIM_LEFT=6
chr11	108115484	108115584	OCP1_ATM_13	.	GENE_ID=ATM;Pool=1;PURPOSE=CDS;CNV_ID=ATM;CNV_HS=1
chr11	108115573	108115646	OCP1_ATM_14	.	GENE_ID=ATM;Pool=2;PURPOSE=CDS;CNV_ID=ATM;CNV_HS=1;TRIM_LEFT=2
chr11	108115639	108115734	OCP1_ATM_15	.	GENE_ID=ATM;Pool=1;PURPOSE=CDS;CNV_ID=ATM;CNV_HS=1
chr11	108115731	108115821	OCP1_ATM_16	.	GENE_ID=ATM;Pool=2;PURPOSE=CDS;CNV_ID=ATM;CNV_HS=1
chr11	108117655	108117764	OCP1_ATM_17	.	GENE_ID=ATM;Pool=1;PURPOSE=CDS;CNV_ID=ATM;CNV_HS=1
chr11	108117765	108117865	CHP2_ATM_1	.	GENE_ID=ATM;Pool=2;PURPOSE=CDS;CNV_ID=ATM;CNV_HS=1
chr11	108119582	108119705	ATM_2.46818	.	GENE_ID=ATM;Pool=1;PURPOSE=CDS;CNV_ID=ATM;CNV_HS=1
chr11	108119685	108119801	ATM_2.108974	.	GENE_ID=ATM;Pool=2;PURPOSE=CDS;CNV_ID=ATM;CNV_HS=1;TRIM_LEFT=6
chr11	108119766	108119834	OCP1_ATM_19	.	GENE_ID=ATM;Pool=1;PURPOSE=CDS;CNV_ID=ATM;CNV_HS=1;TRIM_LEFT=4
chr11	108121405	108121496	ATM_3.45152	.	GENE_ID=ATM;Pool=2;PURPOSE=CDS;CNV_ID=ATM;CNV_HS=1
chr11	108121484	108121579	OCP1_ATM_21	.	GENE_ID=ATM;Pool=1;PURPOSE=CDS;CNV_ID=ATM;CNV_HS=1
chr11	108121568	108121685	OCP1_ATM_22	.	GENE_ID=ATM;Pool=2;PURPOSE=CDS;CNV_ID=ATM;CNV_HS=1;TRIM_LEFT=6
chr11	108121674	108121743	OCP1_ATM_23	.	GENE_ID=ATM;Pool=1;PURPOSE=CDS;CNV_ID=ATM;CNV_HS=1;TRIM_LEFT=5
chr11	108121732	108121805	OCP1_ATM_24	.	GENE_ID=ATM;Pool=2;PURPOSE=CDS;CNV_ID=ATM;CNV_HS=1
chr11	108122529	108122625	OCP1_ATM_25	.	GENE_ID=ATM;Pool=1;PURPOSE=CDS;CNV_ID=ATM;CNV_HS=1
chr11	108122618	108122739	OCP1_ATM_26	.	GENE_ID=ATM;Pool=2;PURPOSE=CDS;CNV_ID=ATM;CNV_HS=1
chr11	108122739	108122854	ATM_4.19543	.	GENE_ID=ATM;Pool=1;PURPOSE=CDS;CNV_ID=ATM;CNV_HS=1
chr11	108123515	108123618	CHP2_ATM_3	.	GENE_ID=ATM;Pool=2;PURPOSE=CDS;CNV_ID=ATM;CNV_HS=1
chr11	108123612	108123695	OCP1_ATM_28	.	GENE_ID=ATM;Pool=1;PURPOSE=CDS;CNV_ID=ATM;CNV_HS=1
chr11	108124510	108124613	OCP1_ATM_29	.	GENE_ID=ATM;Pool=2;PURPOSE=CDS;CNV_ID=ATM;CNV_HS=1
chr11	108124594	108124714	OCP1_ATM_30	.	GENE_ID=ATM;Pool=1;PURPOSE=CDS;CNV_ID=ATM;CNV_HS=1;TRIM_LEFT=9
chr11	108124703	108124804	OCP1_ATM_31	.	GENE_ID=ATM;Pool=2;PURPOSE=CDS;CNV_ID=ATM;CNV_HS=1;TRIM_LEFT=4
chr11	108126850	108126988	ATM_5.11460	.	GENE_ID=ATM;Pool=1;PURPOSE=CDS;CNV_ID=ATM;CNV_HS=1
chr11	108126956	108127050	OCP1_ATM_33	.	GENE_ID=ATM;Pool=2;PURPOSE=CDS;CNV_ID=ATM;CNV_HS=1;TRIM_LEFT=6
chr11	108127036	108127142	OCP1_ATM_34	.	GENE_ID=ATM;Pool=1;PURPOSE=CDS;CNV_ID=ATM;CNV_HS=1;TRIM_LEFT=6
chr11	108128201	108128297	OCP1_ATM_35	.	GENE_ID=ATM;Pool=2;PURPOSE=CDS;CNV_ID=ATM;CNV_HS=1
chr11	108128286	108128401	OCP1_ATM_36	.	GENE_ID=ATM;Pool=1;PURPOSE=CDS;CNV_ID=ATM;CNV_HS=1;TRIM_LEFT=8
chr11	108129700	108129805	OCP1_ATM_37	.	GENE_ID=ATM;Pool=2;PURPOSE=CDS;CNV_ID=ATM;CNV_HS=1
chr11	108129748	108129816	ATM_6.15704	.	GENE_ID=ATM;Pool=1;PURPOSE=CDS;CNV_ID=ATM;CNV_HS=1;TRIM_LEFT=6
chr11	108137891	108138011	OCP1_ATM_39	.	GENE_ID=ATM;Pool=2;PURPOSE=CDS;CNV_ID=ATM;CNV_HS=1
chr11	108137931	108138025	CHP2_ATM_4	.	GENE_ID=ATM;Pool=1;PURPOSE=CDS;CNV_ID=ATM;CNV_HS=1;TRIM_LEFT=3
chr11	108139104	108139186	OCP1_ATM_40	.	GENE_ID=ATM;Pool=2;PURPOSE=CDS;CNV_ID=ATM;CNV_HS=1
chr11	108139175	108139247	OCP1_ATM_41	.	GENE_ID=ATM;Pool=1;PURPOSE=CDS;CNV_ID=ATM;CNV_HS=1;TRIM_LEFT=3
chr11	108139236	108139333	OCP1_ATM_42	.	GENE_ID=ATM;Pool=2;PURPOSE=CDS;CNV_ID=ATM;CNV_HS=1;TRIM_LEFT=4
chr11	108139320	108139410	OCP1_ATM_43	.	GENE_ID=ATM;Pool=1;PURPOSE=CDS;CNV_ID=ATM;CNV_HS=1;TRIM_LEFT=6
chr11	108141770	108141842	OCP1_ATM_44	.	GENE_ID=ATM;Pool=2;PURPOSE=CDS;CNV_ID=ATM;CNV_HS=1
chr11	108141818	108141924	OCP1_ATM_45	.	GENE_ID=ATM;Pool=1;PURPOSE=CDS;CNV_ID=ATM;CNV_HS=1;TRIM_LEFT=9
chr11	108142057	108142152	OCP1_ATM_46	.	GENE_ID=ATM;Pool=2;PURPOSE=CDS;CNV_ID=ATM;CNV_HS=1
chr11	108143211	108143302	OCP1_ATM_48	.	GENE_ID=ATM;Pool=1;PURPOSE=CDS;CNV_ID=ATM;CNV_HS=1
chr11	108143277	108143355	OCP1_ATM_49	.	GENE_ID=ATM;Pool=2;PURPOSE=CDS;CNV_ID=ATM;CNV_HS=1;TRIM_LEFT=11
chr11	108143447	108143529	OCP1_ATM_50	.	GENE_ID=ATM;Pool=1;PURPOSE=CDS;CNV_ID=ATM;CNV_HS=1
chr11	108143513	108143596	OCP1_ATM_51	.	GENE_ID=ATM;Pool=2;PURPOSE=CDS;CNV_ID=ATM;CNV_HS=1;TRIM_LEFT=5
chr11	108150163	108150247	OCP1_ATM_52	.	GENE_ID=ATM;Pool=1;PURPOSE=CDS;CNV_ID=ATM;CNV_HS=1
chr11	108150236	108150350	OCP1_ATM_53	.	GENE_ID=ATM;Pool=2;PURPOSE=CDS;CNV_ID=ATM;CNV_HS=1;TRIM_LEFT=6
chr11	108151670	108151785	ATM_1.9991	.	GENE_ID=ATM;Pool=1;PURPOSE=CDS;CNV_ID=ATM;CNV_HS=1
chr11	108151757	108151836	OCP1_ATM_55	.	GENE_ID=ATM;Pool=2;PURPOSE=CDS;CNV_ID=ATM;CNV_HS=1;TRIM_LEFT=8
chr11	108151825	108151915	OCP1_ATM_56	.	GENE_ID=ATM;Pool=1;PURPOSE=CDS;CNV_ID=ATM;CNV_HS=1;TRIM_LEFT=5
chr11	108153361	108153488	ATM_8.18851	.	GENE_ID=ATM;Pool=2;PURPOSE=CDS;CNV_ID=ATM;CNV_HS=1
chr11	108153457	108153581	ATM_8.22584	.	GENE_ID=ATM;Pool=1;PURPOSE=CDS;CNV_ID=ATM;CNV_HS=1;TRIM_LEFT=7
chr11	108153536	108153673	ATM_8.31863	.	GENE_ID=ATM;Pool=2;PURPOSE=CDS;CNV_ID=ATM;CNV_HS=1
chr11	108154979	108155056	OCP1_ATM_59	.	GENE_ID=ATM;Pool=1;PURPOSE=CDS;CNV_ID=ATM;CNV_HS=1
chr11	108155083	108155180	CHP2_ATM_5	.	GENE_ID=ATM;Pool=2;PURPOSE=CDS;CNV_ID=ATM;CNV_HS=1
chr11	108155122	108155205	OCP1_ATM_60	.	GENE_ID=ATM;Pool=1;PURPOSE=CDS;CNV_ID=ATM;CNV_HS=1;TRIM_LEFT=7
chr11	108158275	108158347	ATM_10.49000	.	GENE_ID=ATM;Pool=2;PURPOSE=CDS;CNV_ID=ATM;CNV_HS=1
chr11	108158338	108158422	OCP1_ATM_62	.	GENE_ID=ATM;Pool=1;PURPOSE=CDS;CNV_ID=ATM;CNV_HS=1;TRIM_LEFT=3
chr11	108158409	108158494	OCP1_ATM_63	.	GENE_ID=ATM;Pool=2;PURPOSE=CDS;CNV_ID=ATM;CNV_HS=1;TRIM_LEFT=2
chr11	108159647	108159756	OCP1_ATM_64	.	GENE_ID=ATM;Pool=1;PURPOSE=CDS;CNV_ID=ATM;CNV_HS=1
chr11	108159745	108159838	OCP1_ATM_65	.	GENE_ID=ATM;Pool=2;PURPOSE=CDS;CNV_ID=ATM;CNV_HS=1;TRIM_LEFT=5
chr11	108160308	108160392	OCP1_ATM_66	.	GENE_ID=ATM;Pool=1;PURPOSE=CDS;CNV_ID=ATM;CNV_HS=1
chr11	108160383	108160475	OCP1_ATM_67	.	GENE_ID=ATM;Pool=2;PURPOSE=CDS;CNV_ID=ATM;CNV_HS=1
chr11	108160469	108160553	OCP1_ATM_68	.	GENE_ID=ATM;Pool=1;PURPOSE=CDS;CNV_ID=ATM;CNV_HS=1
chr11	108163321	108163432	OCP1_ATM_70	.	GENE_ID=ATM;Pool=2;PURPOSE=CDS;CNV_ID=ATM;CNV_HS=1
chr11	108163421	108163499	OCP1_ATM_71	.	GENE_ID=ATM;Pool=1;PURPOSE=CDS;CNV_ID=ATM;CNV_HS=1;TRIM_LEFT=4
chr11	108163480	108163564	ATM_11.5131	.	GENE_ID=ATM;Pool=2;PURPOSE=CDS;CNV_ID=ATM;CNV_HS=1;TRIM_LEFT=5
chr11	108164006	108164107	ATM_2.4011	.	GENE_ID=ATM;Pool=1;PURPOSE=CDS;CNV_ID=ATM;CNV_HS=1
chr11	108164076	108164170	OCP1_ATM_74	.	GENE_ID=ATM;Pool=2;PURPOSE=CDS;CNV_ID=ATM;CNV_HS=1;TRIM_LEFT=4
chr11	108164155	108164253	ATM_12.7435	.	GENE_ID=ATM;Pool=1;PURPOSE=CDS;CNV_ID=ATM;CNV_HS=1;TRIM_LEFT=2
chr11	108165624	108165714	OCP1_ATM_76	.	GENE_ID=ATM;Pool=2;PURPOSE=CDS;CNV_ID=ATM;CNV_HS=1
chr11	108165703	108165797	OCP1_ATM_77	.	GENE_ID=ATM;Pool=1;PURPOSE=CDS;CNV_ID=ATM;CNV_HS=1;TRIM_LEFT=3
chr11	108167976	108168063	OCP1_ATM_78	.	GENE_ID=ATM;Pool=2;PURPOSE=CDS;CNV_ID=ATM;CNV_HS=1
chr11	108168050	108168142	OCP1_ATM_79	.	GENE_ID=ATM;Pool=1;PURPOSE=CDS;CNV_ID=ATM;CNV_HS=1;TRIM_LEFT=11
chr11	108170348	108170455	OCP1_ATM_80	.	GENE_ID=ATM;Pool=2;PURPOSE=CDS;CNV_ID=ATM;CNV_HS=1
chr11	108170456	108170556	CHP2_ATM_6	.	GENE_ID=ATM;Pool=1;PURPOSE=CDS;CNV_ID=ATM;CNV_HS=1
chr11	108170550	108170654	OCP1_ATM_81	.	GENE_ID=ATM;Pool=2;PURPOSE=CDS;CNV_ID=ATM;CNV_HS=1;TRIM_LEFT=4
chr11	108172362	108172467	CHP2_ATM_7	.	GENE_ID=ATM;Pool=1;PURPOSE=CDS;CNV_ID=ATM;CNV_HS=1
chr11	108172468	108172542	OCP1_ATM_82	.	GENE_ID=ATM;Pool=2;PURPOSE=CDS;CNV_ID=ATM;CNV_HS=1
chr11	108173570	108173635	ATM_14.37013	.	GENE_ID=ATM;Pool=1;PURPOSE=CDS;CNV_ID=ATM;CNV_HS=1
chr11	108173630	108173703	CHP2_ATM_8	.	GENE_ID=ATM;Pool=2;PURPOSE=CDS;CNV_ID=ATM;CNV_HS=1
chr11	108173697	108173794	OCP1_ATM_84	.	GENE_ID=ATM;Pool=1;PURPOSE=CDS;CNV_ID=ATM;CNV_HS=1
chr11	108175383	108175464	OCP1_ATM_85	.	GENE_ID=ATM;Pool=2;PURPOSE=CDS;CNV_ID=ATM;CNV_HS=1
chr11	108175449	108175521	OCP1_ATM_86	.	GENE_ID=ATM;Pool=1;PURPOSE=CDS;CNV_ID=ATM;CNV_HS=1;TRIM_LEFT=6
chr11	108175510	108175606	OCP1_ATM_87	.	GENE_ID=ATM;Pool=2;PURPOSE=CDS;CNV_ID=ATM;CNV_HS=1;TRIM_LEFT=5
chr11	108178582	108178658	OCP1_ATM_88	.	GENE_ID=ATM;Pool=1;PURPOSE=CDS;CNV_ID=ATM;CNV_HS=1
chr11	108178645	108178718	OCP1_ATM_89	.	GENE_ID=ATM;Pool=2;PURPOSE=CDS;CNV_ID=ATM;CNV_HS=1;TRIM_LEFT=7
chr11	108180781	108180900	OCP1_ATM_90	.	GENE_ID=ATM;Pool=1;PURPOSE=CDS;CNV_ID=ATM;CNV_HS=1
chr11	108180902	108180960	CHP2_ATM_9	.	GENE_ID=ATM;Pool=2;PURPOSE=CDS;CNV_ID=ATM;CNV_HS=1
chr11	108180960	108181077	OCP1_ATM_91	.	GENE_ID=ATM;Pool=1;PURPOSE=CDS;CNV_ID=ATM;CNV_HS=1
chr11	108183107	108183194	OCP1_ATM_92	.	GENE_ID=ATM;Pool=2;PURPOSE=CDS;CNV_ID=ATM;CNV_HS=1
chr11	108183182	108183280	OCP1_ATM_93	.	GENE_ID=ATM;Pool=1;PURPOSE=CDS;CNV_ID=ATM;CNV_HS=1;TRIM_LEFT=4
chr11	108186543	108186619	OCP1_ATM_94	.	GENE_ID=ATM;Pool=2;PURPOSE=CDS;CNV_ID=ATM;CNV_HS=1
chr11	108186609	108186702	OCP1_ATM_95	.	GENE_ID=ATM;Pool=1;PURPOSE=CDS;CNV_ID=ATM;CNV_HS=1;TRIM_LEFT=7
chr11	108186701	108186772	OCP1_ATM_96	.	GENE_ID=ATM;Pool=2;PURPOSE=CDS;CNV_ID=ATM;CNV_HS=1
chr11	108186761	108186849	OCP1_ATM_97	.	GENE_ID=ATM;Pool=1;PURPOSE=CDS;CNV_ID=ATM;CNV_HS=1;TRIM_LEFT=7
chr11	108188070	108188169	OCP1_ATM_98	.	GENE_ID=ATM;Pool=2;PURPOSE=CDS;CNV_ID=ATM;CNV_HS=1
chr11	108188135	108188233	ATM_15.5171	.	GENE_ID=ATM;Pool=1;PURPOSE=CDS;CNV_ID=ATM;CNV_HS=1
chr11	108188211	108188282	ATM_15.29214	.	GENE_ID=ATM;Pool=2;PURPOSE=CDS;CNV_ID=ATM;CNV_HS=1;TRIM_LEFT=7
chr11	108190632	108190740	OCP1_ATM_100	.	GENE_ID=ATM;Pool=1;PURPOSE=CDS;CNV_ID=ATM;CNV_HS=1
chr11	108190771	108190877	OCP1_ATM_101	.	GENE_ID=ATM;Pool=2;PURPOSE=CDS;CNV_ID=ATM;CNV_HS=1
chr11	108191994	108192068	OCP1_ATM_102	.	GENE_ID=ATM;Pool=1;PURPOSE=CDS;CNV_ID=ATM;CNV_HS=1
chr11	108192057	108192160	OCP1_ATM_103	.	GENE_ID=ATM;Pool=2;PURPOSE=CDS;CNV_ID=ATM;CNV_HS=1;TRIM_LEFT=6
chr11	108196026	108196104	OCP1_ATM_104	.	GENE_ID=ATM;Pool=1;PURPOSE=CDS;CNV_ID=ATM;CNV_HS=1
chr11	108196093	108196169	OCP1_ATM_105	.	GENE_ID=ATM;Pool=2;PURPOSE=CDS;CNV_ID=ATM;CNV_HS=1;TRIM_LEFT=8
chr11	108196157	108196249	OCP1_ATM_106	.	GENE_ID=ATM;Pool=1;PURPOSE=CDS;CNV_ID=ATM;CNV_HS=1;TRIM_LEFT=5
chr11	108196238	108196330	OCP1_ATM_107	.	GENE_ID=ATM;Pool=2;PURPOSE=CDS;CNV_ID=ATM;CNV_HS=1;TRIM_LEFT=7
chr11	108196693	108196814	OCP1_ATM_108	.	GENE_ID=ATM;Pool=1;PURPOSE=CDS;CNV_ID=ATM;CNV_HS=1
chr11	108196802	108196891	OCP1_ATM_109	.	GENE_ID=ATM;Pool=2;PURPOSE=CDS;CNV_ID=ATM;CNV_HS=1;TRIM_LEFT=4
chr11	108196875	108196961	ATM_16.9691	.	GENE_ID=ATM;Pool=1;PURPOSE=CDS;CNV_ID=ATM;CNV_HS=1;TRIM_LEFT=4
chr11	108198338	108198428	OCP1_ATM_111	.	GENE_ID=ATM;Pool=2;PURPOSE=CDS;CNV_ID=ATM;CNV_HS=1
chr11	108198417	108198498	OCP1_ATM_112	.	GENE_ID=ATM;Pool=1;PURPOSE=CDS;CNV_ID=ATM;CNV_HS=1;TRIM_LEFT=5
chr11	108199749	108199825	OCP1_ATM_113	.	GENE_ID=ATM;Pool=2;PURPOSE=CDS;CNV_ID=ATM;CNV_HS=1
chr11	108199899	108199992	OCP1_ATM_114	.	GENE_ID=ATM;Pool=1;PURPOSE=CDS;CNV_ID=ATM;CNV_HS=1
chr11	108200915	108200993	CHP2_ATM_10	.	GENE_ID=ATM;Pool=2;PURPOSE=CDS;CNV_ID=ATM;CNV_HS=1
chr11	108200985	108201081	OCP1_ATM_115	.	GENE_ID=ATM;Pool=1;PURPOSE=CDS;CNV_ID=ATM;CNV_HS=1;TRIM_LEFT=3
chr11	108201072	108201153	OCP1_ATM_116	.	GENE_ID=ATM;Pool=2;PURPOSE=CDS;CNV_ID=ATM;CNV_HS=1;TRIM_LEFT=7
chr11	108202085	108202210	OCP1_ATM_117	.	GENE_ID=ATM;Pool=1;PURPOSE=CDS;CNV_ID=ATM;CNV_HS=1
chr11	108202192	108202281	ATM_17.35951	.	GENE_ID=ATM;Pool=2;PURPOSE=CDS;CNV_ID=ATM;CNV_HS=1;TRIM_LEFT=7
chr11	108202280	108202399	ATM_17.31438	.	GENE_ID=ATM;Pool=1;PURPOSE=CDS;CNV_ID=ATM;CNV_HS=1
chr11	108202525	108202633	ATM_18.31739	.	GENE_ID=ATM;Pool=2;PURPOSE=CDS;CNV_ID=ATM;CNV_HS=1
chr11	108202627	108202731	ATM_3.38260	.	GENE_ID=ATM;Pool=1;PURPOSE=CDS;CNV_ID=ATM;CNV_HS=1
chr11	108202693	108202782	OCP1_ATM_121	.	GENE_ID=ATM;Pool=2;PURPOSE=CDS;CNV_ID=ATM;CNV_HS=1;TRIM_LEFT=6
chr11	108203458	108203556	OCP1_ATM_122	.	GENE_ID=ATM;Pool=1;PURPOSE=CDS;CNV_ID=ATM;CNV_HS=1
chr11	108203545	108203656	OCP1_ATM_123	.	GENE_ID=ATM;Pool=2;PURPOSE=CDS;CNV_ID=ATM;CNV_HS=1;TRIM_LEFT=5
chr11	108204550	108204669	OCP1_ATM_124	.	GENE_ID=ATM;Pool=1;PURPOSE=CDS;CNV_ID=ATM;CNV_HS=1
chr11	108204634	108204684	CHP2_ATM_11	.	GENE_ID=ATM;Pool=2;PURPOSE=CDS;CNV_ID=ATM;CNV_HS=1;TRIM_LEFT=3
chr11	108205665	108205736	OCP1_ATM_125	.	GENE_ID=ATM;Pool=1;PURPOSE=CDS;CNV_ID=ATM;CNV_HS=1
chr11	108205731	108205816	CHP2_ATM_12	.	GENE_ID=ATM;Pool=2;PURPOSE=CDS;CNV_ID=ATM;CNV_HS=1
chr11	108206523	108206628	CHP2_ATM_13	.	GENE_ID=ATM;Pool=1;PURPOSE=CDS;CNV_ID=ATM;CNV_HS=1
chr11	108206629	108206720	OCP1_ATM_126	.	GENE_ID=ATM;Pool=2;PURPOSE=CDS;CNV_ID=ATM;CNV_HS=1
chr11	108213881	108213965	OCP1_ATM_127	.	GENE_ID=ATM;Pool=1;PURPOSE=CDS;CNV_ID=ATM;CNV_HS=1
chr11	108213956	108214055	OCP1_ATM_128	.	GENE_ID=ATM;Pool=2;PURPOSE=CDS;CNV_ID=ATM;CNV_HS=1
chr11	108214045	108214138	OCP1_ATM_129	.	GENE_ID=ATM;Pool=1;PURPOSE=CDS;CNV_ID=ATM;CNV_HS=1;TRIM_LEFT=4
chr11	108216391	108216537	ATM_4.34438	.	GENE_ID=ATM;Pool=2;PURPOSE=CDS;CNV_ID=ATM;CNV_HS=1
chr11	108216520	108216601	OCP1_ATM_131	.	GENE_ID=ATM;Pool=1;PURPOSE=CDS;CNV_ID=ATM;CNV_HS=1;TRIM_LEFT=5
chr11	108216590	108216664	OCP1_ATM_132	.	GENE_ID=ATM;Pool=2;PURPOSE=CDS;CNV_ID=ATM;CNV_HS=1;TRIM_LEFT=5
chr11	108217945	108218058	OCP1_ATM_133	.	GENE_ID=ATM;Pool=1;PURPOSE=CDS;CNV_ID=ATM;CNV_HS=1
chr11	108218015	108218144	CHP2_ATM_14	.	GENE_ID=ATM;Pool=2;PURPOSE=CDS;CNV_ID=ATM;CNV_HS=1;TRIM_LEFT=13
chr11	108224425	108224519	OCP1_ATM_134	.	GENE_ID=ATM;Pool=1;PURPOSE=CDS;CNV_ID=ATM;CNV_HS=1
chr11	108224508	108224617	OCP1_ATM_135	.	GENE_ID=ATM;Pool=2;PURPOSE=CDS;CNV_ID=ATM;CNV_HS=1;TRIM_LEFT=4
chr11	108225512	108225578	OCP1_ATM_136	.	GENE_ID=ATM;Pool=1;PURPOSE=CDS;CNV_ID=ATM;CNV_HS=1
chr11	108225574	108225665	ATM_20.983	.	GENE_ID=ATM;Pool=2;PURPOSE=CDS;CNV_ID=ATM;CNV_HS=1
chr11	108235764	108235847	OCP1_ATM_137	.	GENE_ID=ATM;Pool=1;PURPOSE=CDS;CNV_ID=ATM;CNV_HS=1
chr11	108235835	108235932	OCP1_ATM_138	.	GENE_ID=ATM;Pool=2;PURPOSE=CDS;CNV_ID=ATM;CNV_HS=1;TRIM_LEFT=4
chr11	108235921	108236003	OCP1_ATM_139	.	GENE_ID=ATM;Pool=1;PURPOSE=CDS;CNV_ID=ATM;CNV_HS=1;TRIM_LEFT=5
chr11	108236042	108236140	CHP2_ATM_16	.	GENE_ID=ATM;Pool=2;PURPOSE=CDS;CNV_ID=ATM;CNV_HS=1
chr11	108236053	108236146	OCP1_ATM_140	.	GENE_ID=ATM;Pool=1;PURPOSE=CDS;CNV_ID=ATM;CNV_HS=1;TRIM_LEFT=6
chr11	108236186	108236285	CHP2_ATM_17	.	GENE_ID=ATM;Pool=2;PURPOSE=CDS;CNV_ID=ATM;CNV_HS=1
chr11	119148830	119148946	SP_53.102873	.	GENE_ID=CBL;Pool=1;PURPOSE=Hotspot;CNV_ID=CBL;CNV_HS=0
chr11	119148926	119149044	SP_53.93291	.	GENE_ID=CBL;Pool=2;PURPOSE=Hotspot;CNV_ID=CBL;CNV_HS=0;TRIM_LEFT=8
chr11	119149205	119149295	SP_53.108384	.	GENE_ID=CBL;Pool=1;PURPOSE=Hotspot;CNV_ID=CBL;CNV_HS=0
chr11	119149328	119149458	SP_53.89401	.	GENE_ID=CBL;Pool=2;PURPOSE=Hotspot;CNV_ID=CBL;CNV_HS=0
chr11	125496643	125496746	CHEK1_1.34302	.	GENE_ID=CHEK1;Pool=1;PURPOSE=CDS;CNV_ID=CHEK1;CNV_HS=1
chr11	125497439	125497552	CHEK1_2.69355	.	GENE_ID=CHEK1;Pool=2;PURPOSE=CDS;CNV_ID=CHEK1;CNV_HS=1
chr11	125497552	125497639	CHEK1_2.53978	.	GENE_ID=CHEK1;Pool=1;PURPOSE=CDS;CNV_ID=CHEK1;CNV_HS=1
chr11	125497588	125497708	CHEK1_2.75131	.	GENE_ID=CHEK1;Pool=2;PURPOSE=CDS;CNV_ID=CHEK1;CNV_HS=1;TRIM_LEFT=5
chr11	125497707	125497808	CHEK1_2.35908	.	GENE_ID=CHEK1;Pool=1;PURPOSE=CDS;CNV_ID=CHEK1;CNV_HS=1
chr11	125499090	125499202	CHEK1_3.3526	.	GENE_ID=CHEK1;Pool=2;PURPOSE=CDS;CNV_ID=CHEK1;CNV_HS=1
chr11	125499278	125499348	CHEK1_4.1992	.	GENE_ID=CHEK1;Pool=1;PURPOSE=CDS;CNV_ID=CHEK1;CNV_HS=1
chr11	125499323	125499435	CHEK1_4.11988	.	GENE_ID=CHEK1;Pool=2;PURPOSE=CDS;CNV_ID=CHEK1;CNV_HS=1;TRIM_LEFT=5
chr11	125502973	125503089	CHEK1_5.70042	.	GENE_ID=CHEK1;Pool=1;PURPOSE=CDS;CNV_ID=CHEK1;CNV_HS=1
chr11	125503082	125503149	CHEK1_5.58567	.	GENE_ID=CHEK1;Pool=2;PURPOSE=CDS;CNV_ID=CHEK1;CNV_HS=1
chr11	125503132	125503246	CHEK1_5.33297	.	GENE_ID=CHEK1;Pool=1;PURPOSE=CDS;CNV_ID=CHEK1;CNV_HS=1;TRIM_LEFT=7
chr11	125503198	125503262	CHEK1_5.3771	.	GENE_ID=CHEK1;Pool=2;PURPOSE=CDS;CNV_ID=CHEK1;CNV_HS=1;TRIM_LEFT=3
chr11	125505223	125505344	CHEK1_6.39161	.	GENE_ID=CHEK1;Pool=1;PURPOSE=CDS;CNV_ID=CHEK1;CNV_HS=1
chr11	125505326	125505440	CHEK1_6.1990	.	GENE_ID=CHEK1;Pool=2;PURPOSE=CDS;CNV_ID=CHEK1;CNV_HS=1;TRIM_LEFT=5
chr11	125507338	125507429	CHEK1_7.80970	.	GENE_ID=CHEK1;Pool=1;PURPOSE=CDS;CNV_ID=CHEK1;CNV_HS=1
chr11	125507406	125507493	CHEK1_7.46000	.	GENE_ID=CHEK1;Pool=2;PURPOSE=CDS;CNV_ID=CHEK1;CNV_HS=1;TRIM_LEFT=10
chr11	125513681	125513799	CHEK1_8.2176	.	GENE_ID=CHEK1;Pool=1;PURPOSE=CDS;CNV_ID=CHEK1;CNV_HS=1
chr11	125513935	125514062	CHEK1_9.2043	.	GENE_ID=CHEK1;Pool=2;PURPOSE=CDS;CNV_ID=CHEK1;CNV_HS=1
chr11	125514051	125514153	CHEK1_9.31937	.	GENE_ID=CHEK1;Pool=1;PURPOSE=CDS;CNV_ID=CHEK1;CNV_HS=1;TRIM_LEFT=8
chr11	125514150	125514296	CHEK1_9.12574	.	GENE_ID=CHEK1;Pool=2;PURPOSE=CDS;CNV_ID=CHEK1;CNV_HS=1
chr11	125514397	125514462	CHEK1_10.57014	.	GENE_ID=CHEK1;Pool=1;PURPOSE=CDS;CNV_ID=CHEK1;CNV_HS=1
chr11	125514412	125514540	CHEK1_10.57504	.	GENE_ID=CHEK1;Pool=2;PURPOSE=CDS;CNV_ID=CHEK1;CNV_HS=1;TRIM_LEFT=4
chr11	125523633	125523727	CHEK1_11.14784	.	GENE_ID=CHEK1;Pool=1;PURPOSE=CDS;CNV_ID=CHEK1;CNV_HS=1
chr11	125523727	125523821	CHEK1_1.27848	.	GENE_ID=CHEK1;Pool=2;PURPOSE=CDS;CNV_ID=CHEK1;CNV_HS=1
chr11	125525038	125525138	CHEK1_12.12717	.	GENE_ID=CHEK1;Pool=1;PURPOSE=CDS;CNV_ID=CHEK1;CNV_HS=1
chr11	125525137	125525228	CHEK1_12.96287	.	GENE_ID=CHEK1;Pool=2;PURPOSE=CDS;CNV_ID=CHEK1;CNV_HS=1
chr12	4383095	4383228	CCND2_1.14215	.	GENE_ID=CCND2;Pool=1;PURPOSE=CNV;CNV_ID=CCND2;CNV_HS=1
chr12	4383226	4383344	CCND2_1.41533	.	GENE_ID=CCND2;Pool=2;PURPOSE=CNV;CNV_ID=CCND2;CNV_HS=1
chr12	4383333	4383468	CCND2_1.45758	.	GENE_ID=CCND2;Pool=1;PURPOSE=CNV;CNV_ID=CCND2;CNV_HS=1;TRIM_LEFT=5
chr12	4385129	4385214	CCND2_2.46464	.	GENE_ID=CCND2;Pool=2;PURPOSE=CNV;CNV_ID=CCND2;CNV_HS=1
chr12	4385322	4385438	CCND2_2.56014	.	GENE_ID=CCND2;Pool=1;PURPOSE=CNV;CNV_ID=CCND2;CNV_HS=1
chr12	4387907	4388033	CCND2_3.58600	.	GENE_ID=CCND2;Pool=2;PURPOSE=CNV;CNV_ID=CCND2;CNV_HS=1
chr12	4388004	4388085	CCND2_3.99371	.	GENE_ID=CCND2;Pool=1;PURPOSE=CNV;CNV_ID=CCND2;CNV_HS=1;TRIM_LEFT=6
chr12	4398021	4398133	CCND2_4.33045	.	GENE_ID=CCND2;Pool=2;PURPOSE=CNV;CNV_ID=CCND2;CNV_HS=1
chr12	4398122	4398208	CCND2_4.86279	.	GENE_ID=CCND2;Pool=1;PURPOSE=CNV;CNV_ID=CCND2;CNV_HS=1
chr12	4409018	4409149	CCND2_5.43049	.	GENE_ID=CCND2;Pool=2;PURPOSE=CNV;CNV_ID=CCND2;CNV_HS=1
chr12	12870762	12870859	CDKN1B_1.76442	.	GENE_ID=CDKN1B;Pool=2;PURPOSE=CDS;CNV_ID=CDKN1B;CNV_HS=1
chr12	12870799	12870886	CDKN1B_1.476	.	GENE_ID=CDKN1B;Pool=1;PURPOSE=CDS;CNV_ID=CDKN1B;CNV_HS=1;TRIM_LEFT=7
chr12	12870886	12870994	CDKN1B_1.137469	.	GENE_ID=CDKN1B;Pool=2;PURPOSE=CDS;CNV_ID=CDKN1B;CNV_HS=1
chr12	12870980	12871058	CDKN1B_1.69508	.	GENE_ID=CDKN1B;Pool=1;PURPOSE=CDS;CNV_ID=CDKN1B;CNV_HS=1;TRIM_LEFT=7
chr12	12871026	12871139	CDKN1B_1.116374	.	GENE_ID=CDKN1B;Pool=2;PURPOSE=CDS;CNV_ID=CDKN1B;CNV_HS=1;TRIM_LEFT=3
chr12	12871133	12871219	CDKN1B_1.88876	.	GENE_ID=CDKN1B;Pool=1;PURPOSE=CDS;CNV_ID=CDKN1B;CNV_HS=1
chr12	12871168	12871254	CDKN1B_1.93376	.	GENE_ID=CDKN1B;Pool=2;PURPOSE=CDS;CNV_ID=CDKN1B;CNV_HS=1;TRIM_LEFT=7
chr12	12871752	12871886	CDKN1B_2.81787	.	GENE_ID=CDKN1B;Pool=1;PURPOSE=CDS;CNV_ID=CDKN1B;CNV_HS=1
chr12	25362714	25362814	KRAS_1.7331	.	GENE_ID=KRAS;Pool=2;PURPOSE=CNV,Hotspot;CNV_ID=KRAS;CNV_HS=1
chr12	25362768	25362885	KRAS_1.6067	.	GENE_ID=KRAS;Pool=1;PURPOSE=CNV,Hotspot;CNV_ID=KRAS;CNV_HS=1;TRIM_LEFT=6
chr12	25368368	25368488	KRAS_2.49910	.	GENE_ID=KRAS;Pool=2;PURPOSE=CNV,Hotspot;CNV_ID=KRAS;CNV_HS=1
chr12	25368418	25368538	KRAS_2.92354	.	GENE_ID=KRAS;Pool=1;PURPOSE=CNV,Hotspot;CNV_ID=KRAS;CNV_HS=1;TRIM_LEFT=10
chr12	25378540	25378612	SP_54.48340	.	GENE_ID=KRAS;Pool=2;PURPOSE=CNV,Hotspot;CNV_ID=KRAS;CNV_HS=1
chr12	25378562	25378680	SP_54.36055	.	GENE_ID=KRAS;Pool=1;PURPOSE=CNV,Hotspot;CNV_ID=KRAS;CNV_HS=1
chr12	25378671	25378753	KRAS_3.78423	.	GENE_ID=KRAS;Pool=2;PURPOSE=CNV,Hotspot;CNV_ID=KRAS;CNV_HS=1
chr12	25380180	25380282	KRAS_4.20337	.	GENE_ID=KRAS;Pool=1;PURPOSE=CNV,Hotspot;CNV_ID=KRAS;CNV_HS=1
chr12	25380260	25380364	SP_55.23899	.	GENE_ID=KRAS;Pool=2;PURPOSE=CNV,Hotspot;CNV_ID=KRAS;CNV_HS=1
chr12	25398187	25398310	SP_56.7628	.	GENE_ID=KRAS;Pool=1;PURPOSE=CNV,Hotspot;CNV_ID=KRAS;CNV_HS=1
chr12	25398271	25398388	KRAS_5.23567	.	GENE_ID=KRAS;Pool=2;PURPOSE=CNV,Hotspot;CNV_ID=KRAS;CNV_HS=1;TRIM_LEFT=6
chr12	56360667	56360795	CDK2_1.9175	.	GENE_ID=CDK2;Pool=1;PURPOSE=CNV;CNV_ID=CDK2;CNV_HS=1
chr12	56360794	56360917	CDK2_1.37025	.	GENE_ID=CDK2;Pool=2;PURPOSE=CNV;CNV_ID=CDK2;CNV_HS=1
chr12	56361539	56361657	CDK2_2.40350	.	GENE_ID=CDK2;Pool=1;PURPOSE=CNV;CNV_ID=CDK2;CNV_HS=1
chr12	56362535	56362625	CDK2_4.38018	.	GENE_ID=CDK2;Pool=2;PURPOSE=CNV;CNV_ID=CDK2;CNV_HS=1
chr12	56362611	56362703	CDK2_4.47998	.	GENE_ID=CDK2;Pool=1;PURPOSE=CNV;CNV_ID=CDK2;CNV_HS=1;TRIM_LEFT=9
chr12	56363185	56363302	CDK2_5.78092	.	GENE_ID=CDK2;Pool=2;PURPOSE=CNV;CNV_ID=CDK2;CNV_HS=1
chr12	56363290	56363407	CDK2_5.94679	.	GENE_ID=CDK2;Pool=1;PURPOSE=CNV;CNV_ID=CDK2;CNV_HS=1;TRIM_LEFT=7
chr12	56364823	56364921	CDK2_6.83273	.	GENE_ID=CDK2;Pool=2;PURPOSE=CNV;CNV_ID=CDK2;CNV_HS=1
chr12	56364993	56365079	CDK2_6.63838	.	GENE_ID=CDK2;Pool=1;PURPOSE=CNV;CNV_ID=CDK2;CNV_HS=1
chr12	56365293	56365402	CDK2_7.75644	.	GENE_ID=CDK2;Pool=2;PURPOSE=CNV;CNV_ID=CDK2;CNV_HS=1
chr12	56477595	56477705	SP_57.13984	.	GENE_ID=ERBB3;Pool=1;PURPOSE=Hotspot;CNV_ID=ERBB3;CNV_HS=0
chr12	56478777	56478897	SP_58.46654	.	GENE_ID=ERBB3;Pool=2;PURPOSE=Hotspot;CNV_ID=ERBB3;CNV_HS=0
chr12	56481585	56481692	SP_59.205662	.	GENE_ID=ERBB3;Pool=1;PURPOSE=Hotspot;CNV_ID=ERBB3;CNV_HS=0
chr12	56481882	56482003	SP_59.165315	.	GENE_ID=ERBB3;Pool=2;PURPOSE=Hotspot;CNV_ID=ERBB3;CNV_HS=0
chr12	56482305	56482428	SP_59.369047	.	GENE_ID=ERBB3;Pool=1;PURPOSE=Hotspot;CNV_ID=ERBB3;CNV_HS=0
chr12	56482471	56482591	SP_59.280762	.	GENE_ID=ERBB3;Pool=2;PURPOSE=Hotspot;CNV_ID=ERBB3;CNV_HS=0
chr12	56492527	56492651	SP_60.1910	.	GENE_ID=ERBB3;Pool=1;PURPOSE=Hotspot;CNV_ID=ERBB3;CNV_HS=0
chr12	58142244	58142367	CDK4_1.87343	.	GENE_ID=CDK4;Pool=2;PURPOSE=CNV,Hotspot;CNV_ID=CDK4;CNV_HS=1
chr12	58142320	58142425	CDK4_1.8899	.	GENE_ID=CDK4;Pool=1;PURPOSE=CNV,Hotspot;CNV_ID=CDK4;CNV_HS=1;TRIM_LEFT=5
chr12	58142873	58142981	CDK4_2.20577	.	GENE_ID=CDK4;Pool=2;PURPOSE=CNV,Hotspot;CNV_ID=CDK4;CNV_HS=1
chr12	58143232	58143354	CDK4_3.297	.	GENE_ID=CDK4;Pool=1;PURPOSE=CNV,Hotspot;CNV_ID=CDK4;CNV_HS=1
chr12	58144425	58144549	CDK4_4.76903	.	GENE_ID=CDK4;Pool=2;PURPOSE=CNV,Hotspot;CNV_ID=CDK4;CNV_HS=1
chr12	58144739	58144867	CDK4_5.107924	.	GENE_ID=CDK4;Pool=1;PURPOSE=CNV,Hotspot;CNV_ID=CDK4;CNV_HS=1
chr12	58144862	58144943	CDK4_5.29585	.	GENE_ID=CDK4;Pool=2;PURPOSE=CNV,Hotspot;CNV_ID=CDK4;CNV_HS=1
chr12	58144997	58145126	CDK4_6.2375	.	GENE_ID=CDK4;Pool=1;PURPOSE=CNV,Hotspot;CNV_ID=CDK4;CNV_HS=1
chr12	58145252	58145376	CDK4_7.15006	.	GENE_ID=CDK4;Pool=2;PURPOSE=CNV,Hotspot;CNV_ID=CDK4;CNV_HS=1
chr12	58145343	58145450	SP_61.9539	.	GENE_ID=CDK4;Pool=1;PURPOSE=CNV,Hotspot;CNV_ID=CDK4;CNV_HS=1;TRIM_LEFT=3
chr12	69202190	69202328	MDM2_1.2017	.	GENE_ID=MDM2;Pool=2;PURPOSE=CNV;CNV_ID=MDM2;CNV_HS=1
chr12	69203037	69203133	MDM2_2.60679	.	GENE_ID=MDM2;Pool=1;PURPOSE=CNV;CNV_ID=MDM2;CNV_HS=1
chr12	69207385	69207464	MDM2_3.4787	.	GENE_ID=MDM2;Pool=2;PURPOSE=CNV;CNV_ID=MDM2;CNV_HS=1
chr12	69210654	69210735	MDM2_4.1344	.	GENE_ID=MDM2;Pool=1;PURPOSE=CNV;CNV_ID=MDM2;CNV_HS=1
chr12	69218386	69218454	MDM2_7.11168	.	GENE_ID=MDM2;Pool=2;PURPOSE=CNV;CNV_ID=MDM2;CNV_HS=1
chr12	69222620	69222730	MDM2_8.66012	.	GENE_ID=MDM2;Pool=1;PURPOSE=CNV;CNV_ID=MDM2;CNV_HS=1
chr12	69229630	69229723	MDM2_9.77494	.	GENE_ID=MDM2;Pool=2;PURPOSE=CNV;CNV_ID=MDM2;CNV_HS=1
chr12	69230478	69230570	MDM2_10.22434	.	GENE_ID=MDM2;Pool=1;PURPOSE=CNV;CNV_ID=MDM2;CNV_HS=1
chr12	69233153	69233254	MDM2_11.135018	.	GENE_ID=MDM2;Pool=2;PURPOSE=CNV;CNV_ID=MDM2;CNV_HS=1
chr12	69233352	69233452	MDM2_11.214584	.	GENE_ID=MDM2;Pool=1;PURPOSE=CNV;CNV_ID=MDM2;CNV_HS=1
chr12	112888140	112888256	SP_62.37525	.	GENE_ID=PTPN11;Pool=2;PURPOSE=Hotspot;CNV_ID=PTPN11;CNV_HS=0
chr12	112926834	112926960	SP_63.12349	.	GENE_ID=PTPN11;Pool=1;PURPOSE=Hotspot;CNV_ID=PTPN11;CNV_HS=0
chr12	121426532	121426657	SP_64.17357	.	GENE_ID=HNF1A;Pool=2;PURPOSE=Hotspot;CNV_ID=HNF1A;CNV_HS=0
chr12	121431383	121431480	SP_65.19677	.	GENE_ID=HNF1A;Pool=1;PURPOSE=Hotspot;CNV_ID=HNF1A;CNV_HS=0
chr12	121431453	121431580	SP_65.5450	.	GENE_ID=HNF1A;Pool=2;PURPOSE=Hotspot;CNV_ID=HNF1A;CNV_HS=0;TRIM_LEFT=4
chr12	133201216	133201333	POLE_1.56814	.	GENE_ID=POLE;Pool=1;PURPOSE=CDS;CNV_ID=POLE;CNV_HS=1
chr12	133201298	133201401	POLE_1.71197	.	GENE_ID=POLE;Pool=2;PURPOSE=CDS;CNV_ID=POLE;CNV_HS=1;TRIM_LEFT=11
chr12	133201479	133201577	POLE_2.26431	.	GENE_ID=POLE;Pool=1;PURPOSE=CDS;CNV_ID=POLE;CNV_HS=1
chr12	133201560	133201647	POLE_2.33584	.	GENE_ID=POLE;Pool=2;PURPOSE=CDS;CNV_ID=POLE;CNV_HS=1;TRIM_LEFT=6
chr12	133202105	133202237	POLE_3.12510	.	GENE_ID=POLE;Pool=1;PURPOSE=CDS;CNV_ID=POLE;CNV_HS=1
chr12	133202236	133202361	POLE_3.78319	.	GENE_ID=POLE;Pool=2;PURPOSE=CDS;CNV_ID=POLE;CNV_HS=1
chr12	133202644	133202746	POLE_4.46735	.	GENE_ID=POLE;Pool=1;PURPOSE=CDS;CNV_ID=POLE;CNV_HS=1
chr12	133202735	133202844	POLE_4.67040	.	GENE_ID=POLE;Pool=2;PURPOSE=CDS;CNV_ID=POLE;CNV_HS=1;TRIM_LEFT=7
chr12	133202777	133202908	POLE_4.38762	.	GENE_ID=POLE;Pool=1;PURPOSE=CDS;CNV_ID=POLE;CNV_HS=1
chr12	133208803	133208930	POLE_5.45848	.	GENE_ID=POLE;Pool=2;PURPOSE=CDS;CNV_ID=POLE;CNV_HS=1
chr12	133208910	133209033	POLE_5.105170	.	GENE_ID=POLE;Pool=1;PURPOSE=CDS;CNV_ID=POLE;CNV_HS=1;TRIM_LEFT=11
chr12	133209003	133209079	POLE_5.25285	.	GENE_ID=POLE;Pool=2;PURPOSE=CDS;CNV_ID=POLE;CNV_HS=1;TRIM_LEFT=7
chr12	133209069	133209187	POLE_5.153195	.	GENE_ID=POLE;Pool=1;PURPOSE=CDS;CNV_ID=POLE;CNV_HS=1;TRIM_LEFT=4
chr12	133209244	133209373	POLE_6.51328	.	GENE_ID=POLE;Pool=2;PURPOSE=CDS;CNV_ID=POLE;CNV_HS=1
chr12	133209367	133209470	POLE_6.27893	.	GENE_ID=POLE;Pool=1;PURPOSE=CDS;CNV_ID=POLE;CNV_HS=1
chr12	133210741	133210825	POLE_7.8254	.	GENE_ID=POLE;Pool=2;PURPOSE=CDS;CNV_ID=POLE;CNV_HS=1
chr12	133210825	133210947	POLE_7.74987	.	GENE_ID=POLE;Pool=1;PURPOSE=CDS;CNV_ID=POLE;CNV_HS=1
[truncated: 1,782 more rows]
